# Supplementary material for: Systematic evaluation of multifactorial causal associations for Alzheimer’s disease and an interactive platform MRAD developed based on Mendelian randomization analysis
Source: eLife. 2024 Oct 11;13:RP96224. doi: 10.7554/eLife.96224 (PMC11469671; doi:10.7554/eLife.96224)
Supplement: Supplementary file 2. [file elife-96224-supp2.xlsx]

## Sheet: Supplementary file 2
Supplementary file 2. Basic information of exposure traits in MRC IEU OpenGWAS
GWAS ID	Trait	Consortium	Population	Sex	Year	Number of SNPs	Sample size	ncase	ncontrol	Category	Sub category	Author	PMID	Ontology	Unit	sd	Note
ieu-b-5089	LDL cholesterol	UK Biobank	European	Males	2022	12321875	201678	NA	NA	Continuous	Biomarker	Si Fang	NA	EFO:0004195	SD	NA	NA
ieu-b-5088	Sepsis (under 75)	UK Biobank	European	Males and Females	2021	12243540	462869	11568	451301	Disease	NA	Hamilton F	NA	HP:0100806	logOR	NA	HES + primary care coded under 75. Performed using regenie v2.2.4, adjusted for age, sex, chip, and the first 10 PCAs
ieu-b-5086	Sepsis (28 day death)	UK Biobank	European	Males and Females	2021	12243487	486484	1896	484588	Disease	NA	Hamilton F	NA	HP:0100806	logOR	NA	HES coded only (secondary care). Performed using regenie v2.2.4, adjusted for age, sex, chip, and the first 10 PCAs
ukb-b-1489	Cheese intake	MRC-IEU	European	Males and Females	2018	9851867	451486	NA	NA	Categorical Ordered	NA	Ben Elsworth	NA	NA	SD	NA	1408: Output from GWAS pipeline using Phesant derived variables from UKBiobank
ukb-b-8727	Age at last live birth	MRC-IEU	European	Males and Females	2018	9851867	170248	NA	NA	Continuous	NA	Ben Elsworth	NA	NA	SD	NA	2764: Output from GWAS pipeline using Phesant derived variables from UKBiobank
ukb-a-583	Diagnoses - main ICD10: R11 Nausea and vomiting	Neale Lab	European	Males and Females	2017	10894596	337199	1365	335834	NA	NA	Neale	NA	NA	SD	NA	NA
ukb-b-12466	Treatment/medication code: vitamin c product	MRC-IEU	European	Males and Females	2018	9851867	462933	1222	461711	Binary	NA	Ben Elsworth	NA	NA	SD	NA	20003#1195: Output from GWAS pipeline using Phesant derived variables from UKBiobank
finn-b-REAC_ARTHRO_NOS	Other/unspecified reactive arthropathies	NA	European	Males and Females	2021	16380465	NA	971	217683	Binary	NA	NA	NA	NA	NA	NA	REAC_ARTHRO_NOS
ukb-b-5326	Operative procedures - main OPCS: X33.9 Unspecified other blood transfusion	MRC-IEU	European	Males and Females	2018	9851867	463010	1549	461461	Binary	NA	Ben Elsworth	NA	NA	SD	NA	41200#X339: Output from GWAS pipeline using Phesant derived variables from UKBiobank
prot-c-2889_37_2	Cardiotrophin-1	NA	European	Males and Females	2019	501428	NA	NA	NA	Continuous	NA	Suhre K	28240269	EFO_0007937	NA	NA	name=Cardiotrophin-1; chr=16; start=30896607; end=30903560; entrez=1489; uniprot=Q16619
ukb-d-22608_2	Workplace very hot: Often	NA	European	Males and Females	2018	13296638	90165	10169	79996	Binary	NA	Neale lab	NA	NA	NA	NA	NA
ebi-a-GCST90011362	OTU97_11 (Parabacteroides) abundance	NA	European	NA	2021	5471931	8956	NA	NA	NA	NA	R<U+00FC>hlemann MC	33462482	NA	NA	NA	NA
prot-a-1482	Interleukin-17A	NA	European	Males and Females	2018	10534735	3301	NA	NA	Immune system	Protein	Sun BB	29875488	NA	NA	NA	NA
ebi-a-GCST009541	Heart failure	NA	European	NA	2020	7773021	977323	47309	930014	NA	NA	Shah S	31919418	NA	NA	NA	NA
finn-b-O15_POSTPART_DEPR	Postpartum depression	NA	European	Males and Females	2021	16376275	NA	7604	59601	Binary	NA	NA	NA	NA	NA	NA	O15_POSTPART_DEPR
ukb-d-5610_3	Which eye(s) affected by presbyopia: Both eyes	NA	European	Males and Females	2018	13535065	31494	28009	3485	Binary	NA	Neale lab	NA	NA	NA	NA	NA
prot-c-5068_54_3	CRTAM	NA	European	Males and Females	2019	501428	NA	NA	NA	Continuous	NA	Suhre K	28240269	EFO_0007937	NA	NA	name=Cytotoxic and regulatory T-cell molecule; chr=11; start=122838500; end=122872639; entrez=56253; uniprot=O95727
ebi-a-GCST90011381	OTU97_2 (Bacteroides) abundance	NA	European	NA	2021	5457404	8956	NA	NA	NA	NA	R<U+00FC>hlemann MC	33462482	NA	NA	NA	NA
prot-a-2537	Regulator of G-protein signaling 3	NA	European	Males and Females	2018	10534735	3301	NA	NA	Immune system	Protein	Sun BB	29875488	NA	NA	NA	NA
prot-a-2921	Tachykinin-3	NA	European	Males and Females	2018	10534735	3301	NA	NA	Immune system	Protein	Sun BB	29875488	NA	NA	NA	NA
prot-a-1406	ICOS ligand	NA	European	Males and Females	2018	10534735	3301	NA	NA	Immune system	Protein	Sun BB	29875488	NA	NA	NA	NA
ubm-a-2278	NET100 1122	NA	European	Males	2018	11734354	7916	NA	NA	Continuous	Psychiatric / neurological	Elliott LT	30305740	NA	NA	NA	NA
finn-b-H7_GLOBEDEGENERATED	Degenerated conditions of globe	NA	European	Males and Females	2021	16380461	NA	82	211720	Binary	NA	NA	NA	NA	NA	NA	H7_GLOBEDEGENERATED
ukb-b-20382	PCT responsible for patient data: DERBYSHIRE COUNTY PCT	MRC-IEU	European	Males and Females	2018	9851867	463010	5288	457722	Binary	NA	Ben Elsworth	NA	NA	SD	NA	41229#5N6: Output from GWAS pipeline using Phesant derived variables from UKBiobank
finn-b-MIGRAINE_TRIPTAN	Migraine, single triptan purchase ok & required. ICD-code if available is included	NA	European	Males and Females	2021	16380466	NA	19676	199116	Binary	NA	NA	NA	NA	NA	NA	MIGRAINE_TRIPTAN
finn-b-CD2_BENIGN_TRANSVERSE_COLON_EXALLC	Benign neoplasm: Transverse colon (all cancers excluded)	NA	European	Males and Females	2021	16380338	NA	992	180105	Binary	NA	NA	NA	NA	NA	NA	CD2_BENIGN_TRANSVERSE_COLON_EXALLC
ubm-a-2346	NET100 1190	NA	European	Males	2018	11734354	7916	NA	NA	Continuous	Psychiatric / neurological	Elliott LT	30305740	NA	NA	NA	NA
finn-b-KRA_PSY_AUTISM_EXMORE	Autism spe (more controls excluded)	NA	European	Males and Females	2021	16380156	NA	283	166584	Binary	NA	NA	NA	NA	NA	NA	KRA_PSY_AUTISM_EXMORE
ebi-a-GCST003401	Glomerular filtration rate in non diabetics (creatinine)	NA	European	NA	2016	2118555	118448	NA	NA	NA	NA	Pattaro C	26831199	NA	NA	NA	NA
ubm-a-459	IDP dMRI TBSS L3 Anterior corona radiata L	NA	European	Males	2018	11734354	7532	NA	NA	Continuous	Psychiatric / neurological	Elliott LT	30305740	NA	NA	NA	NA
prot-a-1898	MHC class I polypeptide-related sequence B	NA	European	Males and Females	2018	10534735	3301	NA	NA	Immune system	Protein	Sun BB	29875488	NA	NA	NA	NA
ubm-a-90	IDP T1 FAST ROIs L front orb cortex	NA	European	Males	2018	11734354	8427	NA	NA	Continuous	Psychiatric / neurological	Elliott LT	30305740	NA	NA	NA	NA
met-a-332	Oleate (18:1n9)	NA	European	Males and Females	2014	2545670	7768	NA	NA	Metabolites	Fatty acid	Shin	24816252	NA	log10 units	0.133493	NA
finn-b-N14_VAGINITIS	Vaginitis/vulvovaginitis/vulvitis/abscess of vulva	NA	European	Males and Females	2021	16379540	NA	2003	111858	Binary	NA	NA	NA	NA	NA	NA	N14_VAGINITIS
prot-a-1942	39S ribosomal protein L33, mitochondrial	NA	European	Males and Females	2018	10534735	3301	NA	NA	Immune system	Protein	Sun BB	29875488	NA	NA	NA	NA
ubm-a-2506	NET100 1350	NA	European	Males	2018	11734354	7916	NA	NA	Continuous	Psychiatric / neurological	Elliott LT	30305740	NA	NA	NA	NA
prot-a-1583	Integrin alpha-L	NA	European	Males and Females	2018	10534735	3301	NA	NA	Immune system	Protein	Sun BB	29875488	NA	NA	NA	NA
ukb-b-19277	Intra-ocular pressure, corneal-compensated (right)	MRC-IEU	European	Males and Females	2018	9851867	97653	NA	NA	Continuous	NA	Ben Elsworth	NA	NA	SD	NA	5254: Output from GWAS pipeline using Phesant derived variables from UKBiobank
ubm-a-1506	NET100 0350	NA	European	Males	2018	11734354	7916	NA	NA	Continuous	Psychiatric / neurological	Elliott LT	30305740	NA	NA	NA	NA
finn-b-L12_PYOGENGRANUL	Pyogenic granuloma	NA	European	Males and Females	2021	16380442	NA	197	207482	Binary	NA	NA	NA	NA	NA	NA	L12_PYOGENGRANUL
ukb-b-17772	6mm cylindrical power angle (right)	MRC-IEU	European	Males and Females	2018	9851867	84278	NA	NA	Continuous	NA	Ben Elsworth	NA	NA	SD	NA	5114: Output from GWAS pipeline using Phesant derived variables from UKBiobank
finn-b-D3_COAGDEF_PURPUR_HAEMORRHAGIC	Coagulation defects, purpura and other haemorrhagic conditions	NA	European	Males and Females	2021	16380466	NA	2693	216099	Binary	NA	NA	NA	NA	NA	NA	D3_COAGDEF_PURPUR_HAEMORRHAGIC
met-b-212	CD4mem:%cFTH (2)	NA	European	Females	2015	1624585	497	NA	NA	Immune system	Immune cell subset frequency	Roederer	25772697	NA	%	0.476155	Female twins
ukb-d-22660_107	Gap coding: Unemployed	NA	European	Males and Females	2018	11471563	68042	3610	64432	Binary	NA	Neale lab	NA	NA	NA	NA	NA
ukb-b-5863	Skin removed from poultry	MRC-IEU	European	Males and Females	2018	9851867	14205	13953	252	Binary	NA	Ben Elsworth	NA	NA	SD	NA	103130: Output from GWAS pipeline using Phesant derived variables from UKBiobank
finn-b-O15_ABORT_FAILED	Failed attempted abortion	NA	European	Males and Females	2021	16378794	NA	181	89340	Binary	NA	NA	NA	NA	NA	NA	O15_ABORT_FAILED
ukb-d-22601_31113033	Job coding: laboratory technician, scientific assistant, cytology screener; hospital, medical or health technician	NA	European	Males and Females	2018	10582924	89866	2162	87704	Binary	NA	Neale lab	NA	NA	NA	NA	NA
prot-a-748	C-X-C motif chemokine 5	NA	European	Males and Females	2018	10534735	3301	NA	NA	Immune system	Protein	Sun BB	29875488	NA	NA	NA	NA
ebi-a-GCST90012077	C-C motif chemokine 20 levels	NA	European	NA	2020	12718425	21758	NA	NA	NA	NA	Folkersen L	33067605	NA	NA	NA	NA
prot-a-1604	Protein JTB	NA	European	Males and Females	2018	10534735	3301	NA	NA	Immune system	Protein	Sun BB	29875488	NA	NA	NA	NA
ubm-a-83	IDP T1 FAST ROIs R cing gyrus ant	NA	European	Males	2018	11734354	8427	NA	NA	Continuous	Psychiatric / neurological	Elliott LT	30305740	NA	NA	NA	NA
ukb-b-10309	Operation code: myomectomy/fibroids removed	MRC-IEU	European	Males and Females	2018	9851867	462933	2559	460374	Binary	NA	Ben Elsworth	NA	NA	SD	NA	20004#1509: Output from GWAS pipeline using Phesant derived variables from UKBiobank
ebi-a-GCST90001852	CD3 on CD39+ resting CD4 regulatory T cell	NA	European	NA	2020	14779400	2649	NA	NA	NA	NA	Orr<U+00F9> V	32929287	NA	NA	NA	NA
finn-b-CD2_BENIGN_EAR_RESP_EXALLC	Benign neoplasm of middle ear and respiratory system (all cancers excluded)	NA	European	Males and Females	2021	16380338	NA	1045	179982	Binary	NA	NA	NA	NA	NA	NA	CD2_BENIGN_EAR_RESP_EXALLC
ubm-a-1134	NET25 0188	NA	European	Males	2018	11734354	7916	NA	NA	Continuous	Psychiatric / neurological	Elliott LT	30305740	NA	NA	NA	NA
prot-a-2153	Osteoclast-associated immunoglobulin-like receptor	NA	European	Males and Females	2018	10534735	3301	NA	NA	Immune system	Protein	Sun BB	29875488	NA	NA	NA	NA
ebi-a-GCST90001946	CD33 on CD14+ monocyte	NA	European	NA	2020	14155757	1634	NA	NA	NA	NA	Orr<U+00F9> V	32929287	NA	NA	NA	NA
ukb-b-2703	PCT responsible for patient data: HALTON AND ST HELENS PCT	MRC-IEU	European	Males and Females	2018	9851867	463010	2167	460843	Binary	NA	Ben Elsworth	NA	NA	SD	NA	41229#5NM: Output from GWAS pipeline using Phesant derived variables from UKBiobank
ubm-a-1867	NET100 0711	NA	European	Males	2018	11734354	7916	NA	NA	Continuous	Psychiatric / neurological	Elliott LT	30305740	NA	NA	NA	NA
prot-c-2992_59_2	IL-17 sR	NA	European	Males and Females	2019	501428	NA	NA	NA	Continuous	NA	Suhre K	28240269	EFO_0007937	NA	NA	name=Interleukin-17 receptor A; chr=22; start=17084954; end=17115694; entrez=23765; uniprot=Q96F46
ubm-a-2500	NET100 1344	NA	European	Males	2018	11734354	7916	NA	NA	Continuous	Psychiatric / neurological	Elliott LT	30305740	NA	NA	NA	NA
ubm-a-2432	NET100 1276	NA	European	Males	2018	11734354	7916	NA	NA	Continuous	Psychiatric / neurological	Elliott LT	30305740	NA	NA	NA	NA
ubm-a-2289	NET100 1133	NA	European	Males	2018	11734354	7916	NA	NA	Continuous	Psychiatric / neurological	Elliott LT	30305740	NA	NA	NA	NA
ukb-b-3258	Number of attempts	MRC-IEU	European	Males and Females	2018	9851867	152605	NA	NA	Categorical Ordered	NA	Ben Elsworth	NA	NA	SD	NA	4291: Output from GWAS pipeline using Phesant derived variables from UKBiobank
prot-a-535	Coiled-coil-helix-coiled-coil-helix domain-containing protein 2	NA	European	Males and Females	2018	10534735	3301	NA	NA	Immune system	Protein	Sun BB	29875488	NA	NA	NA	NA
prot-a-2013	Natural cytotoxicity triggering receptor 1	NA	European	Males and Females	2018	10534735	3301	NA	NA	Immune system	Protein	Sun BB	29875488	NA	NA	NA	NA
ukb-b-4921	Diagnoses - main ICD10: M75.0 Adhesive capsulitis of shoulder	MRC-IEU	European	Males and Females	2018	9851867	463010	1083	461927	Binary	NA	Ben Elsworth	NA	NA	SD	NA	41202#M750: Output from GWAS pipeline using Phesant derived variables from UKBiobank
ebi-a-GCST90010171	SLAM family member 7 levels	NA	European	NA	2020	18142274	1299	NA	NA	NA	NA	Gilly A	33303764	NA	NA	NA	NA
ebi-a-GCST90000458	CXCL1 levels	NA	European	NA	2020	7883855	982	NA	NA	NA	NA	Hillary RF	32641083	NA	NA	NA	NA
ukb-a-166	Treatment/medication code: flax oil tablet	Neale Lab	European	Males and Females	2017	10894596	337159	552	336607	NA	NA	Neale	NA	NA	SD	NA	NA
ukb-b-15175	Vitamin and mineral supplements: Vitamin C	MRC-IEU	European	Males and Females	2018	9851867	460351	39880	420471	Binary	NA	Ben Elsworth	NA	NA	SD	NA	6155#3: Output from GWAS pipeline using Phesant derived variables from UKBiobank
ubm-a-313	IDP dMRI TBSS MO Retrolenticular part of internal capsule L	NA	European	Males	2018	11734354	7532	NA	NA	Continuous	Psychiatric / neurological	Elliott LT	30305740	NA	NA	NA	NA
ubm-a-2308	NET100 1152	NA	European	Males	2018	11734354	7916	NA	NA	Continuous	Psychiatric / neurological	Elliott LT	30305740	NA	NA	NA	NA
prot-a-2331	Periostin	NA	European	Males and Females	2018	10534735	3301	NA	NA	Immune system	Protein	Sun BB	29875488	NA	NA	NA	NA
finn-b-E4_PANCSECNAS	Disorder of pancreatic internal secretion, other and/or unspecified	NA	European	Males and Females	2021	16380465	NA	103	217509	Binary	NA	NA	NA	NA	NA	NA	E4_PANCSECNAS
prot-a-3200	Selenoprotein S	NA	European	Males and Females	2018	10534735	3301	NA	NA	Immune system	Protein	Sun BB	29875488	NA	NA	NA	NA
prot-a-805	Protein DEPP	NA	European	Males and Females	2018	10534735	3301	NA	NA	Immune system	Protein	Sun BB	29875488	NA	NA	NA	NA
finn-b-I9_AORTDIS	Dissection of aorta	NA	European	Males and Females	2021	16380411	NA	470	206541	Binary	NA	NA	NA	NA	NA	NA	I9_AORTDIS
ukb-b-11748	Diagnoses - main ICD10: I47.1 Supraventricular tachycardia	MRC-IEU	European	Males and Females	2018	9851867	463010	1306	461704	Binary	NA	Ben Elsworth	NA	NA	SD	NA	41202#I471: Output from GWAS pipeline using Phesant derived variables from UKBiobank
ubm-a-1649	NET100 0493	NA	European	Males	2018	11734354	7916	NA	NA	Continuous	Psychiatric / neurological	Elliott LT	30305740	NA	NA	NA	NA
prot-c-3766_51_4	STX1a	NA	European	Males and Females	2019	501428	NA	NA	NA	Continuous	NA	Suhre K	28240269	EFO_0007937	NA	NA	name=Syntaxin-1A; chr=7; start=73699206; end=73719672; entrez=6804; uniprot=Q16623
ubm-a-53	IDP T1 FAST ROIs R inf temp gyrus ant	NA	European	Males	2018	11734354	8427	NA	NA	Continuous	Psychiatric / neurological	Elliott LT	30305740	NA	NA	NA	NA
ubm-a-2329	NET100 1173	NA	European	Males	2018	11734354	7916	NA	NA	Continuous	Psychiatric / neurological	Elliott LT	30305740	NA	NA	NA	NA
finn-b-CHARCOT	Charcot foot	NA	European	Males and Females	2021	16380187	NA	137	162201	Binary	NA	NA	NA	NA	NA	NA	CHARCOT
ukb-a-214	Illnesses of mother: Chronic bronchitis/emphysema	Neale Lab	European	Males and Females	2017	10894596	308780	18252	291541	NA	NA	Neale	NA	NA	SD	NA	NA
finn-b-N14_OTHNONINFVAG	Other noninflammatory disorders of vagina	NA	European	Males and Females	2021	16376363	NA	1252	68969	Binary	NA	NA	NA	NA	NA	NA	N14_OTHNONINFVAG
ukb-b-8072	Diagnoses - secondary ICD10: N40 Hyperplasia of prostate	MRC-IEU	European	Males and Females	2018	9851867	463010	4133	458877	Binary	NA	Ben Elsworth	NA	NA	SD	NA	41204#N40: Output from GWAS pipeline using Phesant derived variables from UKBiobank
ubm-a-853	IDP dMRI ProbtrackX ISOVF cst r	NA	European	Males	2018	11734354	7532	NA	NA	Continuous	Psychiatric / neurological	Elliott LT	30305740	NA	NA	NA	NA
ebi-a-GCST90001957	CD33 on CD33+ HLA DR+ CD14-	NA	European	NA	2020	14129762	1578	NA	NA	NA	NA	Orr<U+00F9> V	32929287	NA	NA	NA	NA
ubm-a-957	NET25 0011	NA	European	Males	2018	11734354	7916	NA	NA	Continuous	Psychiatric / neurological	Elliott LT	30305740	NA	NA	NA	NA
prot-a-3203	Vacuolar protein sorting-associated protein 29	NA	European	Males and Females	2018	10534735	3301	NA	NA	Immune system	Protein	Sun BB	29875488	NA	NA	NA	NA
ukb-d-L12_ACTINKERA	Actinic keratosis	NA	European	Males and Females	2018	9790362	361194	1349	359845	Binary	NA	Neale lab	NA	NA	NA	NA	NA
ukb-b-4740	Feta intake	MRC-IEU	European	Males and Females	2018	9851867	64945	NA	NA	Categorical Ordered	NA	Ben Elsworth	NA	NA	SD	NA	102880: Output from GWAS pipeline using Phesant derived variables from UKBiobank
finn-b-Z21_FIT_ADJ_OTH_DEVICES	Fitting and adjustment of other devices	NA	European	Males and Females	2021	16380387	NA	4609	193570	Binary	NA	NA	NA	NA	NA	NA	Z21_FIT_ADJ_OTH_DEVICES
prot-a-603	2',3'-cyclic-nucleotide 3'-phosphodiesterase	NA	European	Males and Females	2018	10534735	3301	NA	NA	Immune system	Protein	Sun BB	29875488	NA	NA	NA	NA
ukb-b-185	Frequency of travelling from home to job workplace	MRC-IEU	European	Males and Females	2018	9851867	263534	NA	NA	Categorical Ordered	NA	Ben Elsworth	NA	NA	SD	NA	777: Output from GWAS pipeline using Phesant derived variables from UKBiobank
ubm-a-2919	a2009s rh S postcentral area	NA	European	Males	2018	11734354	8411	NA	NA	Continuous	Psychiatric / neurological	Elliott LT	30305740	NA	NA	NA	NA
finn-b-J10_NECROTIC	Suppurative and necrotic conditions of lower respiratory tract	NA	European	Males and Females	2021	16380466	NA	667	218125	Binary	NA	NA	NA	NA	NA	NA	J10_NECROTIC
ukb-d-LUNG_CANCER_MESOT	Lung cancer and mesothelioma	NA	European	Males and Females	2018	10455414	361194	2007	359187	Binary	NA	Neale lab	NA	NA	NA	NA	NA
ebi-a-GCST90001897	CD28 on CD39+ CD8+ T cell	NA	European	NA	2020	14847481	2914	NA	NA	NA	NA	Orr<U+00F9> V	32929287	NA	NA	NA	NA
ubm-a-2513	NET100 1357	NA	European	Males	2018	11734354	7916	NA	NA	Continuous	Psychiatric / neurological	Elliott LT	30305740	NA	NA	NA	NA
ubm-a-2195	NET100 1039	NA	European	Males	2018	11734354	7916	NA	NA	Continuous	Psychiatric / neurological	Elliott LT	30305740	NA	NA	NA	NA
prot-a-1835	Epididymis-specific alpha-mannosidase	NA	European	Males and Females	2018	10534735	3301	NA	NA	Immune system	Protein	Sun BB	29875488	NA	NA	NA	NA
prot-a-21	2-phosphoxylose phosphatase 1	NA	European	Males and Females	2018	10534735	3301	NA	NA	Immune system	Protein	Sun BB	29875488	NA	NA	NA	NA
ukb-d-H7_EYELIDDIS	Other disorders of eyelid	NA	European	Males and Females	2018	11866341	361194	4529	356665	Binary	NA	Neale lab	NA	NA	NA	NA	NA
met-a-444	X-10510	NA	European	Males and Females	2014	2545516	7792	NA	NA	Metabolites	Unknown metabolite	Shin	24816252	NA	log10 units	0.143172	NA
prot-a-905	Ephrin-B2	NA	European	Males and Females	2018	10534735	3301	NA	NA	Immune system	Protein	Sun BB	29875488	NA	NA	NA	NA
met-b-140	Lymph:%NK	NA	European	Females	2015	1623131	497	NA	NA	Immune system	Immune cell subset frequency	Roederer	25772697	NA	%	15.8938	Female twins
ukb-b-16652	Non-cancer illness code, self-reported: pleurisy	MRC-IEU	European	Males and Females	2018	9851867	462933	1562	461371	Binary	NA	Ben Elsworth	NA	NA	SD	NA	20002#1125: Output from GWAS pipeline using Phesant derived variables from UKBiobank
ieu-a-834	Rheumatoid arthritis	NA	European	Males and Females	2010	2556272	25708	5539	20169	Disease	Autoimmune / inflammatory	Stahl EA	20453842	NA	log odds	NA	Effect allele frequencies are missing
prot-a-964	Ephrin type-B receptor 4	NA	European	Males and Females	2018	10534735	3301	NA	NA	Immune system	Protein	Sun BB	29875488	NA	NA	NA	NA
ebi-a-GCST90006890	Chlamydia trachomatis PorB antibody levels	NA	European	NA	2020	9138738	273	NA	NA	NA	NA	Butler-Laporte G	33204752	NA	NA	NA	NA
ubm-a-1234	NET100 0078	NA	European	Males	2018	11734354	7916	NA	NA	Continuous	Psychiatric / neurological	Elliott LT	30305740	NA	NA	NA	NA
prot-a-2938	Transcobalamin-1	NA	European	Males and Females	2018	10534735	3301	NA	NA	Immune system	Protein	Sun BB	29875488	NA	NA	NA	NA
finn-b-I9_CHD	Major coronary heart disease event	NA	European	Males and Females	2021	16380466	NA	21012	197780	Binary	NA	NA	NA	NA	NA	NA	I9_CHD
ukb-d-22617_4131	Job SOC coding: Filing and other records assistants/clerks	NA	European	Males and Females	2018	10008745	91149	1537	89612	Binary	NA	Neale lab	NA	NA	NA	NA	NA
ubm-a-1677	NET100 0521	NA	European	Males	2018	11734354	7916	NA	NA	Continuous	Psychiatric / neurological	Elliott LT	30305740	NA	NA	NA	NA
prot-a-3178	Vesicle transport protein USE1	NA	European	Males and Females	2018	10534735	3301	NA	NA	Immune system	Protein	Sun BB	29875488	NA	NA	NA	NA
ieu-a-1002	Leptin	NA	European	Males and Females	2016	2474010	32161	NA	NA	Risk factor	Hormone	Kilpelainen	26833098	NA	log ng/ml	NA	Adjusted for BMI; effect allele frequencies are missing
ukb-b-10783	Illnesses of siblings: None of the above (group 2)	MRC-IEU	European	Males and Females	2018	9851867	368679	309513	59166	Binary	NA	Ben Elsworth	NA	NA	SD	NA	20111#101: Output from GWAS pipeline using Phesant derived variables from UKBiobank
finn-b-CD2_BENIGN_THYROID	Benign neoplasm of thyroid gland	NA	European	Males and Females	2021	16380466	NA	455	218337	Binary	NA	NA	NA	NA	NA	NA	CD2_BENIGN_THYROID
finn-b-L12_CHRONICULCEROFSKIN	Chronic ulcer of skin, not elsewhere classified	NA	European	Males and Females	2021	16380442	NA	822	207482	Binary	NA	NA	NA	NA	NA	NA	L12_CHRONICULCEROFSKIN
ebi-a-GCST004607	Plateletcrit	NA	European	NA	2016	29147151	164339	NA	NA	NA	NA	Astle WJ	27863252	NA	NA	NA	NA
finn-b-E4_DELPUB	Delayed puberty	NA	European	Males and Females	2021	16380447	NA	113	211123	Binary	NA	NA	NA	NA	NA	NA	E4_DELPUB
prot-b-36	renin	NA	European	Males and Females	2018	5270646	3394	NA	NA	Immune system	Protein	Folkersen L	28369058	NA	NA	NA	NA
ebi-a-GCST006943	Feeling miserable	NA	European	NA	2018	10824771	376097	NA	NA	NA	NA	Nagel M	29500382	NA	NA	NA	NA
prot-a-4	Multidrug resistance-associated protein 6	NA	European	Males and Females	2018	10534735	3301	NA	NA	Immune system	Protein	Sun BB	29875488	NA	NA	NA	NA
finn-b-HYPOTHY_REIMB	Hypothyroidism, drug reimbursement	NA	European	Males and Females	2021	16375729	NA	7183	59893	Binary	NA	NA	NA	NA	NA	NA	HYPOTHY_REIMB
ukb-b-1306	Diagnoses - main ICD10: K29.6 Other gastritis	MRC-IEU	European	Males and Females	2018	9851867	463010	1830	461180	Binary	NA	Ben Elsworth	NA	NA	SD	NA	41202#K296: Output from GWAS pipeline using Phesant derived variables from UKBiobank
finn-b-ST19_OTHER_UNSPE_INJURI_WRIST_HAND	Other and unspecified injuries of wrist and hand	NA	European	Males and Females	2021	16380376	NA	416	199036	Binary	NA	NA	NA	NA	NA	NA	ST19_OTHER_UNSPE_INJURI_WRIST_HAND
met-a-417	Myo-inositol	NA	European	Males and Females	2014	2545559	7803	NA	NA	Metabolites	Lipid	Shin	24816252	NA	log10 units	0.112848	NA
ukb-b-8699	PCT where patients GP was registered: CENTRAL MANCHESTER PCT	MRC-IEU	European	Males and Females	2018	9851867	463010	1225	461785	Binary	NA	Ben Elsworth	NA	NA	SD	NA	41230#5CL: Output from GWAS pipeline using Phesant derived variables from UKBiobank
ukb-b-872	Operation code: transurethral resection of prostate (turp)	MRC-IEU	European	Males and Females	2018	9851867	462933	2359	460574	Binary	NA	Ben Elsworth	NA	NA	SD	NA	20004#1209: Output from GWAS pipeline using Phesant derived variables from UKBiobank
ukb-b-12646	Treatment speciality of consultant (recoded): General medicine	MRC-IEU	European	Males and Females	2018	9851867	448935	87031	361904	Binary	NA	Ben Elsworth	NA	NA	SD	NA	41246#1490: Output from GWAS pipeline using Phesant derived variables from UKBiobank
ukb-b-8800	Interpolated Year when cancer first diagnosed	MRC-IEU	European	Males and Females	2018	9851867	39107	NA	NA	Continuous	NA	Ben Elsworth	NA	NA	SD	NA	20006: Output from GWAS pipeline using Phesant derived variables from UKBiobank
ukb-d-C79	Diagnoses - main ICD10: C79 Secondary malignant neoplasm of other sites	NA	European	Males and Females	2018	9696317	361194	1099	360095	Binary	NA	Neale lab	NA	NA	NA	NA	NA
met-a-719	X-14189--leucylalanine	NA	European	Males and Females	2014	2545768	2745	NA	NA	Metabolites	Peptide	Shin	24816252	NA	log10 units	0.218576	NA
ubm-a-3129	a2009s rh S parieto occipital thickness	NA	European	Males	2018	11734354	8411	NA	NA	Continuous	Psychiatric / neurological	Elliott LT	30305740	NA	NA	NA	NA
prot-a-137	Apolipoprotein M	NA	European	Males and Females	2018	10534735	3301	NA	NA	Immune system	Protein	Sun BB	29875488	NA	NA	NA	NA
prot-c-3397_7_4	SHP-2	NA	European	Males and Females	2019	501428	NA	NA	NA	Continuous	NA	Suhre K	28240269	EFO_0007937	NA	NA	name=Tyrosine-protein phosphatase non-receptor type 11; chr=12; start=112418351; end=112509913; entrez=5781; uniprot=Q06124
prot-a-3078	Torsin-1A-interacting protein 2	NA	European	Males and Females	2018	10534735	3301	NA	NA	Immune system	Protein	Sun BB	29875488	NA	NA	NA	NA
ubm-a-1096	NET25 0150	NA	European	Males	2018	11734354	7916	NA	NA	Continuous	Psychiatric / neurological	Elliott LT	30305740	NA	NA	NA	NA
ebi-a-GCST90011534	C_Negativicutes prevalence	NA	European	NA	2021	5356641	8956	NA	NA	NA	NA	R<U+00FC>hlemann MC	33462482	NA	NA	NA	NA
ukb-d-K11_OTHGASTR	Other gastritis (incl. Duodenitis)	NA	European	Males and Females	2018	13356120	361194	10518	350676	Binary	NA	Neale lab	NA	NA	NA	NA	NA
prot-a-691	CUB and sushi domain-containing protein 2	NA	European	Males and Females	2018	10534735	3301	NA	NA	Immune system	Protein	Sun BB	29875488	NA	NA	NA	NA
met-b-237	NKeff:%Act(314+)	NA	European	Females	2015	1627500	497	NA	NA	Immune system	Immune cell subset frequency	Roederer	25772697	NA	%	11.5353	Female twins
prot-a-1311	Hepatitis A virus cellular receptor 2	NA	European	Males and Females	2018	10534735	3301	NA	NA	Immune system	Protein	Sun BB	29875488	NA	NA	NA	NA
prot-a-18	Low molecular weight phosphotyrosine protein phosphatase	NA	European	Males and Females	2018	10534735	3301	NA	NA	Immune system	Protein	Sun BB	29875488	NA	NA	NA	NA
finn-b-H8_EXT_ABSC	Abscess of external ear	NA	European	Males and Females	2021	16380437	NA	209	214100	Binary	NA	NA	NA	NA	NA	NA	H8_EXT_ABSC
prot-a-2796	Sorting nexin-8	NA	European	Males and Females	2018	10534735	3301	NA	NA	Immune system	Protein	Sun BB	29875488	NA	NA	NA	NA
ebi-a-GCST90001538	Central Memory CD4+ T cell %CD4+ T cell	NA	European	NA	2020	15141588	3427	NA	NA	NA	NA	Orr<U+00F9> V	32929287	NA	NA	NA	NA
prot-a-2021	Bifunctional heparan sulfate N-deacetylase/N-sulfotransferase 1	NA	European	Males and Females	2018	10534735	3301	NA	NA	Immune system	Protein	Sun BB	29875488	NA	NA	NA	NA
prot-c-5260_80_3	TYK2	NA	European	Males and Females	2019	501428	NA	NA	NA	Continuous	NA	Suhre K	28240269	EFO_0007937	NA	NA	name=Non-receptor tyrosine-protein kinase TYK2; chr=19; start=10350529; end=10380676; entrez=7297; uniprot=P29597
prot-a-1542	Interleukin-6 receptor subunit beta	NA	European	Males and Females	2018	10534735	3301	NA	NA	Immune system	Protein	Sun BB	29875488	NA	NA	NA	NA
met-c-958	Concentration of chylomicrons and largest VLDL particles	NA	European	Males and Females	2016	11598671	18960	NA	NA	Metabolites	Lipid	Kettunen	27005778	NA	SD	NA	XXL.VLDL.P
ieu-a-1137	ER- Breast cancer (GWAS)	BCAC	European	Females	2017	10680257	22068	4480	17588	Disease	Cancer	Michailidou K	29059683	NA	log odds	NA	NA
ukb-b-8241	Treatment/medication code: prednisolone	MRC-IEU	European	Males and Females	2018	9851867	462933	2626	460307	Binary	NA	Ben Elsworth	NA	NA	SD	NA	20003#1140874930: Output from GWAS pipeline using Phesant derived variables from UKBiobank
ubm-a-2371	NET100 1215	NA	European	Males	2018	11734354	7916	NA	NA	Continuous	Psychiatric / neurological	Elliott LT	30305740	NA	NA	NA	NA
ubm-a-1289	NET100 0133	NA	European	Males	2018	11734354	7916	NA	NA	Continuous	Psychiatric / neurological	Elliott LT	30305740	NA	NA	NA	NA
ubm-a-1624	NET100 0468	NA	European	Males	2018	11734354	7916	NA	NA	Continuous	Psychiatric / neurological	Elliott LT	30305740	NA	NA	NA	NA
ebi-a-GCST90011311	F_Coriobacteriaceae abundance	NA	European	NA	2021	5403738	8956	NA	NA	NA	NA	R<U+00FC>hlemann MC	33462482	NA	NA	NA	NA
finn-b-AB1_ZOSTER	Zoster [herpes zoster]	NA	European	Males and Females	2021	16380433	NA	2080	211856	Binary	NA	NA	NA	NA	NA	NA	AB1_ZOSTER
prot-a-68	Aldose reductase	NA	European	Males and Females	2018	10534735	3301	NA	NA	Immune system	Protein	Sun BB	29875488	NA	NA	NA	NA
prot-a-2100	Neuropilin-2	NA	European	Males and Females	2018	10534735	3301	NA	NA	Immune system	Protein	Sun BB	29875488	NA	NA	NA	NA
ebi-a-GCST004455	Interleukin-2 levels	NA	European	NA	2016	9512914	3475	NA	NA	NA	NA	Ahola-Olli AV	27989323	NA	NA	NA	NA
finn-b-MUCOPROCT	Mucosal proctocolitis	NA	European	Males and Females	2021	16380454	NA	1973	210300	Binary	NA	NA	NA	NA	NA	NA	MUCOPROCT
ukb-b-13998	Diagnoses - secondary ICD10: N84.0 Polyp of corpus uteri	MRC-IEU	European	Males and Females	2018	9851867	463010	2252	460758	Binary	NA	Ben Elsworth	NA	NA	SD	NA	41204#N840: Output from GWAS pipeline using Phesant derived variables from UKBiobank
ubm-a-532	IDP dMRI TBSS OD Middle cerebellar peduncle	NA	European	Males	2018	11734354	7532	NA	NA	Continuous	Psychiatric / neurological	Elliott LT	30305740	NA	NA	NA	NA
prot-a-920	Eukaryotic translation initiation factor 3 subunit J	NA	European	Males and Females	2018	10534735	3301	NA	NA	Immune system	Protein	Sun BB	29875488	NA	NA	NA	NA
ebi-a-GCST90012041	Kidney injury molecule 1 levels	NA	European	NA	2020	13103458	21758	NA	NA	NA	NA	Folkersen L	33067605	NA	NA	NA	NA
prot-a-1298	Granzyme B	NA	European	Males and Females	2018	10534735	3301	NA	NA	Immune system	Protein	Sun BB	29875488	NA	NA	NA	NA
ukb-d-22614_1	Worked with pesticides: Sometimes	NA	European	Males and Females	2018	11359743	88141	3385	84756	Binary	NA	Neale lab	NA	NA	NA	NA	NA
ubm-a-1544	NET100 0388	NA	European	Males	2018	11734354	7916	NA	NA	Continuous	Psychiatric / neurological	Elliott LT	30305740	NA	NA	NA	NA
ukb-b-13978	Average monthly intake of other alcoholic drinks	MRC-IEU	European	Males and Females	2018	9851867	34317	NA	NA	Categorical Ordered	NA	Ben Elsworth	NA	NA	SD	NA	4462: Output from GWAS pipeline using Phesant derived variables from UKBiobank
prot-a-2502	Probable RNA-binding protein 23	NA	European	Males and Females	2018	10534735	3301	NA	NA	Immune system	Protein	Sun BB	29875488	NA	NA	NA	NA
ukb-d-M13_GANGLION	Ganglion	NA	European	Males and Females	2018	10642236	361194	2239	358955	Binary	NA	Neale lab	NA	NA	NA	NA	NA
ukb-b-2285	Diagnoses - main ICD10: H25.0 Senile incipient cataract	MRC-IEU	European	Males and Females	2018	9851867	463010	1061	461949	Binary	NA	Ben Elsworth	NA	NA	SD	NA	41202#H250: Output from GWAS pipeline using Phesant derived variables from UKBiobank
ubm-a-2472	NET100 1316	NA	European	Males	2018	11734354	7916	NA	NA	Continuous	Psychiatric / neurological	Elliott LT	30305740	NA	NA	NA	NA
prot-c-2768_56_2	Hemopexin	NA	European	Males and Females	2019	501428	NA	NA	NA	Continuous	NA	Suhre K	28240269	EFO_0007937	NA	NA	name=Hemopexin; chr=11; start=6431049; end=6442617; entrez=3263; uniprot=P02790
ebi-a-GCST90017108	Gut microbiota abundance (order Verrucomicrobiales id.4030)	NA	European	NA	2021	5518011	14306	NA	NA	NA	NA	Kurilshikov A	33462485	NA	NA	NA	NA
finn-b-L12_INTERNALSUBSTANCEDERM	Dermatitis due to substances taken internally	NA	European	Males and Females	2021	16380429	NA	1181	198740	Binary	NA	NA	NA	NA	NA	NA	L12_INTERNALSUBSTANCEDERM
finn-b-H7_BLINDANDVISIMPAIRMENT	Visual impairment including blindness (binocular or monocular)	NA	European	Males and Females	2021	16380453	NA	903	210866	Binary	NA	NA	NA	NA	NA	NA	H7_BLINDANDVISIMPAIRMENT
finn-b-ASTHMA_NAS	Asthma, unspecified (mode)	NA	European	Males and Females	2021	16379960	NA	9443	135449	Binary	NA	NA	NA	NA	NA	NA	ASTHMA_NAS
ukb-b-1707	Average weekly spirits intake	MRC-IEU	European	Males and Females	2018	9851867	326565	NA	NA	Categorical Ordered	NA	Ben Elsworth	NA	NA	SD	NA	1598: Output from GWAS pipeline using Phesant derived variables from UKBiobank
prot-a-1629	Uncharacterized family 31 glucosidase KIAA1161	NA	European	Males and Females	2018	10534735	3301	NA	NA	Immune system	Protein	Sun BB	29875488	NA	NA	NA	NA
met-b-205	CD4mem:%Th1* (2)	NA	European	Females	2015	1625300	497	NA	NA	Immune system	Immune cell subset frequency	Roederer	25772697	NA	%	1.71344	Female twins
prot-a-1518	Interleukin-2 receptor subunit alpha	NA	European	Males and Females	2018	10534735	3301	NA	NA	Immune system	Protein	Sun BB	29875488	NA	NA	NA	NA
prot-a-1214	Gap junction alpha-8 protein	NA	European	Males and Females	2018	10534735	3301	NA	NA	Immune system	Protein	Sun BB	29875488	NA	NA	NA	NA
prot-a-1902	MICOS complex subunit MIC10	NA	European	Males and Females	2018	10534735	3301	NA	NA	Immune system	Protein	Sun BB	29875488	NA	NA	NA	NA
met-d-TG_by_PG	Ratio of triglycerides to phosphoglycerides	NA	European	Males and Females	2020	12321875	114999	NA	NA	Continuous	NA	Borges CM	NA	NA	NA	NA	NA
ubm-a-1052	NET25 0106	NA	European	Males	2018	11734354	7916	NA	NA	Continuous	Psychiatric / neurological	Elliott LT	30305740	NA	NA	NA	NA
finn-b-Z21_DEPENDENCE_ENABL_MACHINES_DEVICES_NOT_ELSEW_CLASSIFIED	Dependence on enabling machines and devices, not elsewhere classified	NA	European	Males and Females	2021	16380402	NA	168	195047	Binary	NA	NA	NA	NA	NA	NA	Z21_DEPENDENCE_ENABL_MACHINES_DEVICES_NOT_ELSEW_CLASSIFIED
finn-b-G6_NEUINFL	Inflammatory diseases of the central nervous system	NA	European	Males and Females	2021	16380466	NA	1307	217485	Binary	NA	NA	NA	NA	NA	NA	G6_NEUINFL
ukb-b-16066	Spreads/sauces consumers	MRC-IEU	European	Males and Females	2018	9851867	64949	32699	32250	Binary	NA	Ben Elsworth	NA	NA	SD	NA	103310: Output from GWAS pipeline using Phesant derived variables from UKBiobank
ebi-a-GCST90016666	Liver volume	NA	European	NA	2021	9275407	32860	NA	NA	NA	NA	Liu Y	34128465	NA	NA	NA	NA
prot-c-2708_54_2	TNFSF18	NA	European	Males and Females	2019	501428	NA	NA	NA	Continuous	NA	Suhre K	28240269	EFO_0007937	NA	NA	name=Tumor necrosis factor ligand superfamily member 18; chr=1; start=173039960; end=173050963; entrez=8995; uniprot=Q9UNG2
finn-b-I9_PAROXTAC_EXNONE	Paroxysmal tachycardia (no controls excluded)	NA	European	Males and Females	2021	16380466	NA	4787	214005	Binary	NA	NA	NA	NA	NA	NA	I9_PAROXTAC_EXNONE
ukb-a-113	Non-cancer illness code self-reported: arthritis (nos)	Neale Lab	European	Males and Females	2017	10894596	337159	2599	334560	NA	NA	Neale	NA	NA	SD	NA	NA
prot-a-413	G2/mitotic-specific cyclin-B1	NA	European	Males and Females	2018	10534735	3301	NA	NA	Immune system	Protein	Sun BB	29875488	NA	NA	NA	NA
ebi-a-GCST90000514	Gastroesophageal reflux disease	NA	European	NA	2021	2320781	602604	129080	473524	NA	NA	Ong JS	34187846	NA	NA	NA	NA
finn-b-CD2_BENIGN_SKIN_LIP_EXALLC	Benign neoplasm: Skin of lip (all cancers excluded)	NA	European	Males and Females	2021	16380337	NA	216	180608	Binary	NA	NA	NA	NA	NA	NA	CD2_BENIGN_SKIN_LIP_EXALLC
ukb-a-426	Eye problems/disorders: Cataract	Neale Lab	European	Males and Females	2017	10894596	108817	10475	98342	NA	NA	Neale	NA	NA	SD	NA	NA
ubm-a-2420	NET100 1264	NA	European	Males	2018	11734354	7916	NA	NA	Continuous	Psychiatric / neurological	Elliott LT	30305740	NA	NA	NA	NA
ubm-a-2198	NET100 1042	NA	European	Males	2018	11734354	7916	NA	NA	Continuous	Psychiatric / neurological	Elliott LT	30305740	NA	NA	NA	NA
prot-a-1709	Neutrophil gelatinase-associated lipocalin	NA	European	Males and Females	2018	10534735	3301	NA	NA	Immune system	Protein	Sun BB	29875488	NA	NA	NA	NA
ebi-a-GCST90001721	CD19 on CD20- B cell	NA	European	NA	2020	15048785	3656	NA	NA	NA	NA	Orr<U+00F9> V	32929287	NA	NA	NA	NA
ukb-b-12060	PCT where patients GP was registered: NORTH HAMPSHIRE PCT	MRC-IEU	European	Males and Females	2018	9851867	463010	1008	462002	Binary	NA	Ben Elsworth	NA	NA	SD	NA	41230#5DF: Output from GWAS pipeline using Phesant derived variables from UKBiobank
ukb-b-18138	Operation code: coronary angiogram	MRC-IEU	European	Males and Females	2018	9851867	462933	3071	459862	Binary	NA	Ben Elsworth	NA	NA	SD	NA	20004#1514: Output from GWAS pipeline using Phesant derived variables from UKBiobank
ukb-a-303	Hair/balding pattern: Pattern 4	Neale Lab	European	Males and Females	2017	10894596	154988	28389	126599	NA	NA	Neale	NA	NA	SD	NA	NA
ebi-a-GCST90010142	Interleukin-1-receptor antagonist levels	NA	European	NA	2020	18166693	1301	NA	NA	NA	NA	Gilly A	33303764	NA	NA	NA	NA
ukb-b-13932	Duration of vigorous activity	MRC-IEU	European	Males and Females	2018	9851867	251501	NA	NA	Continuous	NA	Ben Elsworth	NA	NA	SD	NA	914: Output from GWAS pipeline using Phesant derived variables from UKBiobank
finn-b-C3_UNCERTAIN_SECONDARY	Secondary uncertain malignant neoplasm	NA	European	Males and Females	2021	16380466	NA	1600	217192	Binary	NA	NA	NA	NA	NA	NA	C3_UNCERTAIN_SECONDARY
ukb-b-4094	Length of mobile phone use	MRC-IEU	European	Males and Females	2018	9851867	456972	NA	NA	Categorical Ordered	NA	Ben Elsworth	NA	NA	SD	NA	1110: Output from GWAS pipeline using Phesant derived variables from UKBiobank
prot-a-637	Cytochrome c oxidase subunit 4 isoform 2, mitochondrial	NA	European	Males and Females	2018	10534735	3301	NA	NA	Immune system	Protein	Sun BB	29875488	NA	NA	NA	NA
met-b-172	DPT:%Exhausted	NA	European	Females	2015	1624114	497	NA	NA	Immune system	Immune cell subset frequency	Roederer	25772697	NA	%	15.9304	Female twins
ukb-b-9708	Diagnoses - main ICD10: M79.66 Pain in limb (Lower leg)	MRC-IEU	European	Males and Females	2018	9851867	463010	1689	461321	Binary	NA	Ben Elsworth	NA	NA	SD	NA	41202#M7966: Output from GWAS pipeline using Phesant derived variables from UKBiobank
ukb-b-2557	Smoked cigarette or pipe within last hour	MRC-IEU	European	Males and Females	2018	9851867	43496	5587	37909	Binary	NA	Ben Elsworth	NA	NA	SD	NA	3159: Output from GWAS pipeline using Phesant derived variables from UKBiobank
finn-b-AB1_VIRAL_ENCEPHALITIS_NOS	Viral encephalitis, not elsewhere classified/unspecified	NA	European	Males and Females	2021	16380460	NA	268	217637	Binary	NA	NA	NA	NA	NA	NA	AB1_VIRAL_ENCEPHALITIS_NOS
ebi-a-GCST006099	Accelerometer-based physical activity measurement (average acceleration)	NA	European	NA	2018	11796201	91084	NA	NA	NA	NA	Klimentidis YC	29899525	NA	NA	NA	NA
finn-b-ST19_DISLO_SPRAIN_STRAIN_JOINTS_LIGAM_HEAD	Dislocation, sprain and strain of joints and ligaments of head	NA	European	Males and Females	2021	16380358	NA	564	196254	Binary	NA	NA	NA	NA	NA	NA	ST19_DISLO_SPRAIN_STRAIN_JOINTS_LIGAM_HEAD
prot-c-2524_56_3	HMG-1	NA	European	Males and Females	2019	501428	NA	NA	NA	Continuous	NA	Suhre K	28240269	EFO_0007937	NA	NA	name=High mobility group protein B1; chr=13; start=30456704; end=30617597; entrez=3146; uniprot=P09429
ukb-b-4106	Chest pain or discomfort when walking uphill or hurrying	MRC-IEU	European	Males and Females	2018	9851867	57944	15422	42522	Binary	NA	Ben Elsworth	NA	NA	SD	NA	3751: Output from GWAS pipeline using Phesant derived variables from UKBiobank
ebi-a-GCST010779	COVID-19 (hospitalized vs population) RELEASE 4	NA	European	NA	2020	11272365	908494	6406	902088	NA	NA	COVID-19 Host Genetics Initiative	32404885	NA	NA	NA	NA
ebi-a-GCST90011505	TestASV_28 (Holdemanella) abundance	NA	European	NA	2021	5518386	8956	NA	NA	NA	NA	R<U+00FC>hlemann MC	33462482	NA	NA	NA	NA
ubm-a-1745	NET100 0589	NA	European	Males	2018	11734354	7916	NA	NA	Continuous	Psychiatric / neurological	Elliott LT	30305740	NA	NA	NA	NA
ubm-a-2688	volume Optic-Chiasm	NA	European	Males	2018	11734354	8411	NA	NA	Continuous	Psychiatric / neurological	Elliott LT	30305740	NA	NA	NA	NA
ukb-a-484	Types of physical activity in last 4 weeks: Other exercises (eg: swimming cycling keep fit bowling)	Neale Lab	European	Males and Females	2017	10894596	335599	162803	172796	NA	NA	Neale	NA	NA	SD	NA	NA
ukb-d-COLITNONINFNAS	Noninfectious colitis NAS	NA	European	Males and Females	2018	13071028	361194	8945	352249	Binary	NA	Neale lab	NA	NA	NA	NA	NA
ubm-a-2092	NET100 0936	NA	European	Males	2018	11734354	7916	NA	NA	Continuous	Psychiatric / neurological	Elliott LT	30305740	NA	NA	NA	NA
finn-b-CD2_BENIGN_MENINGES_SPINAL	Benign neoplasm: Spinal meninges	NA	European	Males and Females	2021	16380466	NA	118	218674	Binary	NA	NA	NA	NA	NA	NA	CD2_BENIGN_MENINGES_SPINAL
prot-a-1006	Coagulation Factor X	NA	European	Males and Females	2018	10534735	3301	NA	NA	Immune system	Protein	Sun BB	29875488	NA	NA	NA	NA
ukb-b-3475	Operative procedures - secondary OPCS: M45.9 Unspecified diagnostic endoscopic examination of bladder	MRC-IEU	European	Males and Females	2018	9851867	463010	4336	458674	Binary	NA	Ben Elsworth	NA	NA	SD	NA	41210#M459: Output from GWAS pipeline using Phesant derived variables from UKBiobank
prot-a-132	Apolipoprotein E (isoform E2)	NA	European	Males and Females	2018	10534735	3301	NA	NA	Immune system	Protein	Sun BB	29875488	NA	NA	NA	NA
ukb-b-13773	Operative procedures - secondary OPCS: Y84.8 Other specified other anaesthetic	MRC-IEU	European	Males and Females	2018	9851867	463010	1909	461101	Binary	NA	Ben Elsworth	NA	NA	SD	NA	41210#Y848: Output from GWAS pipeline using Phesant derived variables from UKBiobank
ebi-a-GCST90001686	CD28- CD8+ T cell %CD8+ T cell	NA	European	NA	2020	15147619	3440	NA	NA	NA	NA	Orr<U+00F9> V	32929287	NA	NA	NA	NA
ukb-a-9	Sleep duration	Neale Lab	European	Males and Females	2017	10894596	335410	NA	NA	NA	NA	Neale	NA	NA	SD	NA	NA
ukb-b-12234	Operation code: cystectomy	MRC-IEU	European	Males and Females	2018	9851867	462933	2447	460486	Binary	NA	Ben Elsworth	NA	NA	SD	NA	20004#1429: Output from GWAS pipeline using Phesant derived variables from UKBiobank
prot-a-894	Elongation factor 1-beta	NA	European	Males and Females	2018	10534735	3301	NA	NA	Immune system	Protein	Sun BB	29875488	NA	NA	NA	NA
prot-a-430	T-cell surface antigen CD2	NA	European	Males and Females	2018	10534735	3301	NA	NA	Immune system	Protein	Sun BB	29875488	NA	NA	NA	NA
prot-a-795	Beta-defensin 119	NA	European	Males and Females	2018	10534735	3301	NA	NA	Immune system	Protein	Sun BB	29875488	NA	NA	NA	NA
prot-a-3168	Netrin receptor UNC5C	NA	European	Males and Females	2018	10534735	3301	NA	NA	Immune system	Protein	Sun BB	29875488	NA	NA	NA	NA
ebi-a-GCST90010327	Meteorin-like protein levels	NA	European	NA	2020	18197903	1313	NA	NA	NA	NA	Gilly A	33303764	NA	NA	NA	NA
ukb-b-14162	PCT where patients GP was registered: KIRKLEES PCT	MRC-IEU	European	Males and Females	2018	9851867	463010	2290	460720	Binary	NA	Ben Elsworth	NA	NA	SD	NA	41230#5N2: Output from GWAS pipeline using Phesant derived variables from UKBiobank
finn-b-F5_DEMENTIA	Dementia	NA	European	Males and Females	2021	16380463	NA	7284	209487	Binary	NA	NA	NA	NA	NA	NA	F5_DEMENTIA
ubm-a-2109	NET100 0953	NA	European	Males	2018	11734354	7916	NA	NA	Continuous	Psychiatric / neurological	Elliott LT	30305740	NA	NA	NA	NA
prot-a-1841	Dual specificity mitogen-activated protein kinase kinase 3	NA	European	Males and Females	2018	10534735	3301	NA	NA	Immune system	Protein	Sun BB	29875488	NA	NA	NA	NA
ieu-a-966	Lung cancer	ILCCO	European	Males and Females	2014	8945893	27209	11348	15861	Disease	Cancer	Wang Y	24880342	NA	log odds	NA	NA
finn-b-M13_DERMATOPOLY	Dermatopolymyositis	NA	European	Males and Females	2021	16380451	NA	208	213145	Binary	NA	NA	NA	NA	NA	NA	M13_DERMATOPOLY
ebi-a-GCST90017113	Gut microbiota abundance (phylum Euryarchaeota id.55)	NA	European	NA	2021	5165248	14306	NA	NA	NA	NA	Kurilshikov A	33462485	NA	NA	NA	NA
ukb-b-4725	Non-cancer illness code, self-reported: duodenal ulcer	MRC-IEU	European	Males and Females	2018	9851867	462933	1908	461025	Binary	NA	Ben Elsworth	NA	NA	SD	NA	20002#1457: Output from GWAS pipeline using Phesant derived variables from UKBiobank
ebi-a-GCST90006899	Epstein-Barr virus EBNA-1 antibody levels	NA	European	NA	2020	9170056	7972	NA	NA	NA	NA	Butler-Laporte G	33204752	NA	NA	NA	NA
ukb-b-14801	Treatment speciality of consultant (recoded): Rheumatology	MRC-IEU	European	Males and Females	2018	9851867	444199	3553	440646	Binary	NA	Ben Elsworth	NA	NA	SD	NA	41246#2510: Output from GWAS pipeline using Phesant derived variables from UKBiobank
ubm-a-2704	volume TotalGrayVol	NA	European	Males	2018	11734354	8411	NA	NA	Continuous	Psychiatric / neurological	Elliott LT	30305740	NA	NA	NA	NA
ubm-a-1754	NET100 0598	NA	European	Males	2018	11734354	7916	NA	NA	Continuous	Psychiatric / neurological	Elliott LT	30305740	NA	NA	NA	NA
ubm-a-2054	NET100 0898	NA	European	Males	2018	11734354	7916	NA	NA	Continuous	Psychiatric / neurological	Elliott LT	30305740	NA	NA	NA	NA
prot-a-3198	Vascular endothelial growth factor A	NA	European	Males and Females	2018	10534735	3301	NA	NA	Immune system	Protein	Sun BB	29875488	NA	NA	NA	NA
ubm-a-2998	a2009s lh Lat Fis-ant-Vertical thickness	NA	European	Males	2018	11734354	8411	NA	NA	Continuous	Psychiatric / neurological	Elliott LT	30305740	NA	NA	NA	NA
prot-a-809	Integral membrane protein DGCR2/IDD	NA	European	Males and Females	2018	10534735	3301	NA	NA	Immune system	Protein	Sun BB	29875488	NA	NA	NA	NA
prot-c-5231_79_3	PCSK9	NA	European	Males and Females	2019	501428	NA	NA	NA	Continuous	NA	Suhre K	28240269	EFO_0007937	NA	NA	name=Proprotein convertase subtilisin/kexin type 9; chr=1; start=55039548; end=55064852; entrez=255738; uniprot=Q8NBP7
finn-b-D3_COAGDEF	Chronic Coagulation defects	NA	European	Males and Females	2021	16380466	NA	281	218511	Binary	NA	NA	NA	NA	NA	NA	D3_COAGDEF
prot-a-2463	Peptide YY	NA	European	Males and Females	2018	10534735	3301	NA	NA	Immune system	Protein	Sun BB	29875488	NA	NA	NA	NA
ukb-b-4745	Diagnoses - secondary ICD10: Y43.3 Other antineoplastic drugs	MRC-IEU	European	Males and Females	2018	9851867	463010	1101	461909	Binary	NA	Ben Elsworth	NA	NA	SD	NA	41204#Y433: Output from GWAS pipeline using Phesant derived variables from UKBiobank
ubm-a-1047	NET25 0101	NA	European	Males	2018	11734354	7916	NA	NA	Continuous	Psychiatric / neurological	Elliott LT	30305740	NA	NA	NA	NA
finn-b-CD2_BENIGN_TRANSVERSE_COLON	Benign neoplasm: Transverse colon	NA	European	Males and Females	2021	16380466	NA	992	217800	Binary	NA	NA	NA	NA	NA	NA	CD2_BENIGN_TRANSVERSE_COLON
ubm-a-655	IDP dMRI ProbtrackX MD ar l	NA	European	Males	2018	11734354	7532	NA	NA	Continuous	Psychiatric / neurological	Elliott LT	30305740	NA	NA	NA	NA
ebi-a-GCST90001682	CD127- CD8+ T cell %T cell	NA	European	NA	2020	15134952	3403	NA	NA	NA	NA	Orr<U+00F9> V	32929287	NA	NA	NA	NA
finn-b-AB1_HEPATITIS_OTHER_VIRAL	Other viral hepatitis	NA	European	Males and Females	2021	16380466	NA	1007	217566	Binary	NA	NA	NA	NA	NA	NA	AB1_HEPATITIS_OTHER_VIRAL
prot-a-2540	Rho-related GTP-binding protein RhoD	NA	European	Males and Females	2018	10534735	3301	NA	NA	Immune system	Protein	Sun BB	29875488	NA	NA	NA	NA
ubm-a-1283	NET100 0127	NA	European	Males	2018	11734354	7916	NA	NA	Continuous	Psychiatric / neurological	Elliott LT	30305740	NA	NA	NA	NA
ebi-a-GCST90017011	Gut microbiota abundance (genus Fusicatenibacter id.11305)	NA	European	NA	2021	5697232	14306	NA	NA	NA	NA	Kurilshikov A	33462485	NA	NA	NA	NA
ubm-a-2005	NET100 0849	NA	European	Males	2018	11734354	7916	NA	NA	Continuous	Psychiatric / neurological	Elliott LT	30305740	NA	NA	NA	NA
prot-a-1610	Potassium voltage-gated channel subfamily E member 2	NA	European	Males and Females	2018	10534735	3301	NA	NA	Immune system	Protein	Sun BB	29875488	NA	NA	NA	NA
ukb-b-10769	PCT where patients GP was registered: BIRMINGHAM EAST AND NORTH PCT	MRC-IEU	European	Males and Females	2018	9851867	463010	2459	460551	Binary	NA	Ben Elsworth	NA	NA	SD	NA	41230#5PG: Output from GWAS pipeline using Phesant derived variables from UKBiobank
ukb-b-19236	Treatment/medication code: fluticasone	MRC-IEU	European	Males and Females	2018	9851867	462933	2024	460909	Binary	NA	Ben Elsworth	NA	NA	SD	NA	20003#1140888098: Output from GWAS pipeline using Phesant derived variables from UKBiobank
prot-a-1353	High mobility group protein B3	NA	European	Males and Females	2018	10534735	3301	NA	NA	Immune system	Protein	Sun BB	29875488	NA	NA	NA	NA
ubm-a-1492	NET100 0336	NA	European	Males	2018	11734354	7916	NA	NA	Continuous	Psychiatric / neurological	Elliott LT	30305740	NA	NA	NA	NA
ukb-b-11064	Diagnoses - secondary ICD10: Z95.1 Presence of aortocoronary bypass graft	MRC-IEU	European	Males and Females	2018	9851867	463010	3358	459652	Binary	NA	Ben Elsworth	NA	NA	SD	NA	41204#Z951: Output from GWAS pipeline using Phesant derived variables from UKBiobank
ukb-a-130	Treatment/medication code: senna	Neale Lab	European	Males and Females	2017	10894596	337159	634	336525	NA	NA	Neale	NA	NA	SD	NA	NA
ukb-d-30620_raw	Alanine aminotransferase	NA	European	Males and Females	2018	13586000	NA	NA	NA	Metabolites	NA	Neale lab	NA	NA	NA	NA	NA
ubm-a-1086	NET25 0140	NA	European	Males	2018	11734354	7916	NA	NA	Continuous	Psychiatric / neurological	Elliott LT	30305740	NA	NA	NA	NA
ubm-a-2383	NET100 1227	NA	European	Males	2018	11734354	7916	NA	NA	Continuous	Psychiatric / neurological	Elliott LT	30305740	NA	NA	NA	NA
ebi-a-GCST90011377	OTU97_165 (Porphyromonadaceae) abundance	NA	European	NA	2021	5580286	8956	NA	NA	NA	NA	R<U+00FC>hlemann MC	33462482	NA	NA	NA	NA
prot-a-2497	Retinoblastoma-binding protein 5	NA	European	Males and Females	2018	10534735	3301	NA	NA	Immune system	Protein	Sun BB	29875488	NA	NA	NA	NA
ukb-b-4616	Nap during day	MRC-IEU	European	Males and Females	2018	9851867	462400	NA	NA	Categorical Ordered	NA	Ben Elsworth	NA	NA	SD	NA	1190: Output from GWAS pipeline using Phesant derived variables from UKBiobank
ebi-a-GCST90011429	OTU99_124 (Paraprevotella) abundance	NA	European	NA	2021	5568407	8956	NA	NA	NA	NA	R<U+00FC>hlemann MC	33462482	NA	NA	NA	NA
ukb-d-20422	More irritable than usual during worst period of anxiety	NA	European	Males and Females	2018	13541047	33425	24014	9411	Binary	NA	Neale lab	NA	NA	NA	NA	NA
prot-a-1859	Matrilin-4	NA	European	Males and Females	2018	10534735	3301	NA	NA	Immune system	Protein	Sun BB	29875488	NA	NA	NA	NA
ubm-a-584	IDP dMRI TBSS ISOVF Splenium of corpus callosum	NA	European	Males	2018	11734354	7532	NA	NA	Continuous	Psychiatric / neurological	Elliott LT	30305740	NA	NA	NA	NA
ubm-a-2369	NET100 1213	NA	European	Males	2018	11734354	7916	NA	NA	Continuous	Psychiatric / neurological	Elliott LT	30305740	NA	NA	NA	NA
ukb-b-2634	Duration of heavy DIY	MRC-IEU	European	Males and Females	2018	9851867	182778	NA	NA	Categorical Ordered	NA	Ben Elsworth	NA	NA	SD	NA	2634: Output from GWAS pipeline using Phesant derived variables from UKBiobank
met-a-453	Threonate	NA	European	Males and Females	2014	2545583	7782	NA	NA	Metabolites	Cofactors and vitamins	Shin	24816252	NA	log10 units	0.191768	NA
ukb-a-145	Treatment/medication code: ranitidine	Neale Lab	European	Males and Females	2017	10894596	337159	5481	331678	NA	NA	Neale	NA	NA	SD	NA	NA
met-a-697	2-methylbutyroylcarnitine	NA	European	Males and Females	2014	2545908	7420	NA	NA	Metabolites	Amino acid	Shin	24816252	NA	log10 units	0.13514	NA
ukb-d-20554_1	Actions taken following self-harm: See anyone from psychiatric or mental health services, including liaison services	NA	European	Males and Females	2018	10169094	117733	1693	116040	Binary	NA	Neale lab	NA	NA	NA	NA	NA
finn-b-CD2_BENIGN_SALIVARY_EXALLC	Benign neoplasm of major salivary glands (all cancers excluded)	NA	European	Males and Females	2021	16380337	NA	1298	179859	Binary	NA	NA	NA	NA	NA	NA	CD2_BENIGN_SALIVARY_EXALLC
ukb-b-4655	Frequency of walking for pleasure in last 4 weeks	MRC-IEU	European	Males and Females	2018	9851867	328320	NA	NA	Categorical Ordered	NA	Ben Elsworth	NA	NA	SD	NA	971: Output from GWAS pipeline using Phesant derived variables from UKBiobank
ukb-d-22601_35423237	Job coding: sales or marketing representative, manufacturer's agent or representative or salesman/woman	NA	European	Males and Females	2018	9483797	89866	1121	88745	Binary	NA	Neale lab	NA	NA	NA	NA	NA
ukb-b-5617	Operation code: pilonidal sinus surgery (anal)	MRC-IEU	European	Males and Females	2018	9851867	462933	2665	460268	Binary	NA	Ben Elsworth	NA	NA	SD	NA	20004#1484: Output from GWAS pipeline using Phesant derived variables from UKBiobank
ubm-a-2208	NET100 1052	NA	European	Males	2018	11734354	7916	NA	NA	Continuous	Psychiatric / neurological	Elliott LT	30305740	NA	NA	NA	NA
prot-a-2000	Beta-soluble NSF attachment protein	NA	European	Males and Females	2018	10534735	3301	NA	NA	Immune system	Protein	Sun BB	29875488	NA	NA	NA	NA
finn-b-G6_ALCOPOLY	Alcohol induced polyneuropathy (G6_ALCOPOLY)	NA	European	Males and Females	2021	16380464	NA	125	215718	Binary	NA	NA	NA	NA	NA	NA	G6_ALCOPOLY
ubm-a-2764	a2009s lh G insular short area	NA	European	Males	2018	11734354	8411	NA	NA	Continuous	Psychiatric / neurological	Elliott LT	30305740	NA	NA	NA	NA
finn-b-E4_HYPEROSMHNAT	Hyperosmolality and hypernatraemia	NA	European	Males and Females	2021	16380377	NA	149	197259	Binary	NA	NA	NA	NA	NA	NA	E4_HYPEROSMHNAT
ebi-a-GCST90001445	IgD- CD38- B cell %B cell	NA	European	NA	2020	15048951	3657	NA	NA	NA	NA	Orr<U+00F9> V	32929287	NA	NA	NA	NA
finn-b-ST19_FOCAL_BRAIN_INJURY	Focal brain injury	NA	European	Males and Females	2021	16379970	NA	1065	136576	Binary	NA	NA	NA	NA	NA	NA	ST19_FOCAL_BRAIN_INJURY
prot-a-1742	Leukocyte immunoglobulin-like receptor subfamily B member 1	NA	European	Males and Females	2018	10534735	3301	NA	NA	Immune system	Protein	Sun BB	29875488	NA	NA	NA	NA
ebi-a-GCST90002041	CD45 on lymphocyte	NA	European	NA	2020	14155839	1635	NA	NA	NA	NA	Orr<U+00F9> V	32929287	NA	NA	NA	NA
ukb-d-30600_raw	Albumin	NA	European	Males and Females	2018	13585334	NA	NA	NA	Metabolites	NA	Neale lab	NA	NA	NA	NA	NA
ukb-a-520	Diagnoses - main ICD10: C61 Malignant neoplasm of prostate	Neale Lab	European	Males and Females	2017	10894596	337199	2273	334926	NA	NA	Neale	NA	NA	SD	NA	NA
finn-b-L12_OTHERCONTACT	Other contact dermatitis	NA	European	Males and Females	2021	16380425	NA	1303	198740	Binary	NA	NA	NA	NA	NA	NA	L12_OTHERCONTACT
ieu-a-90	Obesity class 1	GIANT	European	Males and Females	2013	2380428	98697	32858	65839	Risk factor	Anthropometric	Berndt SI	23563607	NA	log odds	NA	NA
ukb-b-8236	Treatment/medication code: evening primrose oil product	MRC-IEU	European	Males and Females	2018	9851867	462933	1027	461906	Binary	NA	Ben Elsworth	NA	NA	SD	NA	20003#1197: Output from GWAS pipeline using Phesant derived variables from UKBiobank
prot-a-2469	Sulfhydryl oxidase 1	NA	European	Males and Females	2018	10534735	3301	NA	NA	Immune system	Protein	Sun BB	29875488	NA	NA	NA	NA
ebi-a-GCST90011607	OTU97_6 (Sutterella) prevalence	NA	European	NA	2021	5408519	8956	NA	NA	NA	NA	R<U+00FC>hlemann MC	33462482	NA	NA	NA	NA
ubm-a-3132	a2009s rh S precentral-inf-part thickness	NA	European	Males	2018	11734354	8411	NA	NA	Continuous	Psychiatric / neurological	Elliott LT	30305740	NA	NA	NA	NA
ebi-a-GCST90002093	CD11b on CD66b++ myeloid cell	NA	European	NA	2020	14033866	1465	NA	NA	NA	NA	Orr<U+00F9> V	32929287	NA	NA	NA	NA
prot-a-2203	Protocadherin beta-1	NA	European	Males and Females	2018	10534735	3301	NA	NA	Immune system	Protein	Sun BB	29875488	NA	NA	NA	NA
finn-b-I9_AORTANEUR	Aortic aneurysm	NA	European	Males and Females	2021	16380417	NA	2825	206541	Binary	NA	NA	NA	NA	NA	NA	I9_AORTANEUR
finn-b-O15_RETAINED_PLAC_MEMB_NO_HEAMORRH	Retained placenta and membranes, without haemorrhage	NA	European	Males and Females	2021	16379224	NA	2029	98626	Binary	NA	NA	NA	NA	NA	NA	O15_RETAINED_PLAC_MEMB_NO_HEAMORRH
finn-b-K11_ANOMALI_JAW_C_BASE_RELATIONS	Anomalies of jaw-cranial base relationship	NA	European	Males and Females	2021	16380466	NA	1237	217555	Binary	NA	NA	NA	NA	NA	NA	K11_ANOMALI_JAW_C_BASE_RELATIONS
prot-a-798	Beta-defensin 123	NA	European	Males and Females	2018	10534735	3301	NA	NA	Immune system	Protein	Sun BB	29875488	NA	NA	NA	NA
ubm-a-2286	NET100 1130	NA	European	Males	2018	11734354	7916	NA	NA	Continuous	Psychiatric / neurological	Elliott LT	30305740	NA	NA	NA	NA
prot-a-3253	Tyrosine-protein kinase ZAP-70	NA	European	Males and Females	2018	10534735	3301	NA	NA	Immune system	Protein	Sun BB	29875488	NA	NA	NA	NA
prot-a-631	Procollagen galactosyltransferase 1	NA	European	Males and Females	2018	10534735	3301	NA	NA	Immune system	Protein	Sun BB	29875488	NA	NA	NA	NA
met-d-L_VLDL_FC	Free cholesterol in large VLDL	NA	European	Males and Females	2020	12321875	115078	NA	NA	Continuous	NA	Borges CM	NA	NA	NA	NA	NA
prot-a-2098	Neuritin	NA	European	Males and Females	2018	10534735	3301	NA	NA	Immune system	Protein	Sun BB	29875488	NA	NA	NA	NA
finn-b-I9_INTRACRA_EXNONE	Nontraumatic intracranial haemmorrhage (no controls excluded)	NA	European	Males and Females	2021	16380466	NA	2794	215998	Binary	NA	NA	NA	NA	NA	NA	I9_INTRACRA_EXNONE
ukb-b-698	How are people in household related to participant: Husband, wife or partner	MRC-IEU	European	Males and Females	2018	9851867	459600	338180	121420	Binary	NA	Ben Elsworth	NA	NA	SD	NA	6141#1: Output from GWAS pipeline using Phesant derived variables from UKBiobank
finn-b-LOCALIZED_SKIN_ERUPT_DRUGS_MEDICAM	Localized skin eruption due to drugs and medicaments	NA	European	Males and Females	2021	16380466	NA	113	218679	Binary	NA	NA	NA	NA	NA	NA	LOCALIZED_SKIN_ERUPT_DRUGS_MEDICAM
ubm-a-687	IDP dMRI ProbtrackX MO cgc r	NA	European	Males	2018	11734354	7532	NA	NA	Continuous	Psychiatric / neurological	Elliott LT	30305740	NA	NA	NA	NA
prot-a-1333	Homogentisate 1,2-dioxygenase	NA	European	Males and Females	2018	10534735	3301	NA	NA	Immune system	Protein	Sun BB	29875488	NA	NA	NA	NA
prot-c-2953_31_2	Luteinizing hormone	NA	European	Males and Females	2019	501428	NA	NA	NA	Continuous	NA	Suhre K	28240269	EFO_0007937	NA	NA	name=Luteinizing hormone; chr=19|6; start=49015980|87085498; end=49017090|87095406; entrez=1081|3972; uniprot=P01215|P01229
ukb-b-5620	Nitrogen dioxide air pollution; 2006	MRC-IEU	European	Males and Females	2018	9851867	456380	NA	NA	Continuous	NA	Ben Elsworth	NA	NA	SD	NA	24017: Output from GWAS pipeline using Phesant derived variables from UKBiobank
ukb-b-3855	Attendance/disability/mobility allowance: None of the above	MRC-IEU	European	Males and Females	2018	9851867	459354	432343	27011	Binary	NA	Ben Elsworth	NA	NA	SD	NA	6146#100: Output from GWAS pipeline using Phesant derived variables from UKBiobank
ubm-a-529	IDP dMRI TBSS ICVF Uncinate fasciculus L	NA	European	Males	2018	11734354	7532	NA	NA	Continuous	Psychiatric / neurological	Elliott LT	30305740	NA	NA	NA	NA
ukb-b-1888	Operation code: abdominal/pelvic adhesion surgery	MRC-IEU	European	Males and Females	2018	9851867	462933	1457	461476	Binary	NA	Ben Elsworth	NA	NA	SD	NA	20004#1485: Output from GWAS pipeline using Phesant derived variables from UKBiobank
ukb-b-11189	Type of special diet followed: Gluten-free	MRC-IEU	European	Males and Females	2018	9851867	64949	1376	63573	Binary	NA	Ben Elsworth	NA	NA	SD	NA	20086#8: Output from GWAS pipeline using Phesant derived variables from UKBiobank
prot-a-1951	Macrophage scavenger receptor types I and II	NA	European	Males and Females	2018	10534735	3301	NA	NA	Immune system	Protein	Sun BB	29875488	NA	NA	NA	NA
prot-a-2693	Corticosteroid-binding globulin	NA	European	Males and Females	2018	10534735	3301	NA	NA	Immune system	Protein	Sun BB	29875488	NA	NA	NA	NA
ukb-b-12620	Diagnoses - main ICD10: M79.86 Other specified soft tissue disorders (Lower leg)	MRC-IEU	European	Males and Females	2018	9851867	463010	1592	461418	Binary	NA	Ben Elsworth	NA	NA	SD	NA	41202#M7986: Output from GWAS pipeline using Phesant derived variables from UKBiobank
finn-b-CD2_BENIGN_BREAST_EXALLC	Benign neoplasm of breast (all cancers excluded)	NA	European	Males and Females	2021	16378990	NA	2079	101074	Binary	NA	NA	NA	NA	NA	NA	CD2_BENIGN_BREAST_EXALLC
prot-a-3126	Thioredoxin reductase 1, cytoplasmic	NA	European	Males and Females	2018	10534735	3301	NA	NA	Immune system	Protein	Sun BB	29875488	NA	NA	NA	NA
ubm-a-2866	a2009s rh G front inf-Triangul area	NA	European	Males	2018	11734354	8411	NA	NA	Continuous	Psychiatric / neurological	Elliott LT	30305740	NA	NA	NA	NA
ukb-d-N80	Diagnoses - main ICD10: N80 Endometriosis	NA	European	Males and Females	2018	9983671	361194	1496	359698	Binary	NA	Neale lab	NA	NA	NA	NA	NA
prot-a-2359	Peroxiredoxin-1	NA	European	Males and Females	2018	10534735	3301	NA	NA	Immune system	Protein	Sun BB	29875488	NA	NA	NA	NA
prot-a-1448	Insulin-like growth factor-binding protein 2	NA	European	Males and Females	2018	10534735	3301	NA	NA	Immune system	Protein	Sun BB	29875488	NA	NA	NA	NA
prot-a-2564	RING finger protein 148	NA	European	Males and Females	2018	10534735	3301	NA	NA	Immune system	Protein	Sun BB	29875488	NA	NA	NA	NA
met-d-S_VLDL_CE_pct	Cholesteryl esters to total lipids ratio in small VLDL	NA	European	Males and Females	2020	12321875	115078	NA	NA	Continuous	NA	Borges CM	NA	NA	NA	NA	NA
ubm-a-926	NODEamps100 0035	NA	European	Males	2018	11734354	7916	NA	NA	Continuous	Psychiatric / neurological	Elliott LT	30305740	NA	NA	NA	NA
ukb-b-6569	PCT where patients GP was registered: HEYWOOD, MIDDLETON AND ROCHDALE PCT	MRC-IEU	European	Males and Females	2018	9851867	463010	1897	461113	Binary	NA	Ben Elsworth	NA	NA	SD	NA	41230#5NQ: Output from GWAS pipeline using Phesant derived variables from UKBiobank
met-a-421	3-methyl-2-oxobutyrate	NA	European	Males and Females	2014	2545692	7648	NA	NA	Metabolites	Amino acid	Shin	24816252	NA	log10 units	0.114791	NA
met-d-M_VLDL_CE	Cholesteryl esters in medium VLDL	NA	European	Males and Females	2020	12321875	115078	NA	NA	Continuous	NA	Borges CM	NA	NA	NA	NA	NA
finn-b-F5_SEXDYS	Sexual dysfunction	NA	European	Males and Females	2021	16380450	NA	160	213826	Binary	NA	NA	NA	NA	NA	NA	F5_SEXDYS
ubm-a-2033	NET100 0877	NA	European	Males	2018	11734354	7916	NA	NA	Continuous	Psychiatric / neurological	Elliott LT	30305740	NA	NA	NA	NA
finn-b-H7_LAGOPHTALMOS	Lagophthalmos	NA	European	Males and Females	2021	16380434	NA	150	203231	Binary	NA	NA	NA	NA	NA	NA	H7_LAGOPHTALMOS
ukb-b-18297	Operative procedures - main OPCS: J13.2 Percutaneous biopsy of lesion of liver NEC	MRC-IEU	European	Males and Females	2018	9851867	463010	1291	461719	Binary	NA	Ben Elsworth	NA	NA	SD	NA	41200#J132: Output from GWAS pipeline using Phesant derived variables from UKBiobank
ubm-a-1995	NET100 0839	NA	European	Males	2018	11734354	7916	NA	NA	Continuous	Psychiatric / neurological	Elliott LT	30305740	NA	NA	NA	NA
finn-b-C3_SMALL_INTESTINE_EXALLC	Malignant neoplasm of small intestine (all cancers excluded)	NA	European	Males and Females	2021	16380304	NA	252	174006	Binary	NA	NA	NA	NA	NA	NA	C3_SMALL_INTESTINE_EXALLC
ebi-a-GCST90011434	OTU99_150 (Prevotella) abundance	NA	European	NA	2021	5430417	8956	NA	NA	NA	NA	R<U+00FC>hlemann MC	33462482	NA	NA	NA	NA
ubm-a-1079	NET25 0133	NA	European	Males	2018	11734354	7916	NA	NA	Continuous	Psychiatric / neurological	Elliott LT	30305740	NA	NA	NA	NA
met-a-439	X-09706	NA	European	Males and Females	2014	2545584	7697	NA	NA	Metabolites	Unknown metabolite	Shin	24816252	NA	log10 units	0.148712	NA
finn-b-E4_DIABINSIPIDUS	Diabetes insipidus	NA	European	Males and Females	2021	16380447	NA	142	211123	Binary	NA	NA	NA	NA	NA	NA	E4_DIABINSIPIDUS
prot-c-3284_75_1	BGN	NA	European	Males and Females	2019	501428	NA	NA	NA	Continuous	NA	Suhre K	28240269	EFO_0007937	NA	NA	name=Biglycan; chr=X; start=153494939; end=153509554; entrez=633; uniprot=P21810
ebi-a-GCST90000462	CXCL6 levels	NA	European	NA	2020	7883858	982	NA	NA	NA	NA	Hillary RF	32641083	NA	NA	NA	NA
finn-b-ST19_BURNS_CORROSIO_EXTER_BODY_SURFA_SPECIFE_SITE	Burns and corrosions of external body surface, specified by site	NA	European	Males and Females	2021	16380465	NA	1523	216681	Binary	NA	NA	NA	NA	NA	NA	ST19_BURNS_CORROSIO_EXTER_BODY_SURFA_SPECIFE_SITE
met-d-DHA	Docosahexaenoic acid	NA	European	Males and Females	2020	12321875	114999	NA	NA	Continuous	NA	Borges CM	NA	NA	NA	NA	NA
ukb-b-10766	Treatment/medication code: tegretol 100mg tablet	MRC-IEU	European	Males and Females	2018	9851867	462933	1011	461922	Binary	NA	Ben Elsworth	NA	NA	SD	NA	20003#1140872072: Output from GWAS pipeline using Phesant derived variables from UKBiobank
finn-b-G6_HCNP	Normal-pressure hydrocephalus	NA	European	Males and Females	2021	16380465	NA	322	218043	Binary	NA	NA	NA	NA	NA	NA	G6_HCNP
ebi-a-GCST90001923	CD127 on CD45RA- CD4 not regulatory T cell	NA	European	NA	2020	14849646	2920	NA	NA	NA	NA	Orr<U+00F9> V	32929287	NA	NA	NA	NA
met-a-686	X-13477	NA	European	Males and Females	2014	2545812	5952	NA	NA	Metabolites	Unknown metabolite	Shin	24816252	NA	log10 units	0.149679	NA
prot-c-4549_78_2	FUT5	NA	European	Males and Females	2019	501428	NA	NA	NA	Continuous	NA	Suhre K	28240269	EFO_0007937	NA	NA	name=Alpha-(1,3)-fucosyltransferase 5; chr=19; start=5865826; end=5870540; entrez=2527; uniprot=Q11128
prot-a-3185	Vesicle-associated membrane protein 3	NA	European	Males and Females	2018	10534735	3301	NA	NA	Immune system	Protein	Sun BB	29875488	NA	NA	NA	NA
ebi-a-GCST90016929	Gut microbiota abundance (family Bifidobacteriaceae id.433)	NA	European	NA	2021	5668532	14306	NA	NA	NA	NA	Kurilshikov A	33462485	NA	NA	NA	NA
ebi-a-GCST90001968	FSC-A on B cell	NA	European	NA	2020	14903706	3112	NA	NA	NA	NA	Orr<U+00F9> V	32929287	NA	NA	NA	NA
ukb-b-12171	Treatment/medication code: ferrous sulphate	MRC-IEU	European	Males and Females	2018	9851867	462933	2294	460639	Binary	NA	Ben Elsworth	NA	NA	SD	NA	20003#1140870390: Output from GWAS pipeline using Phesant derived variables from UKBiobank
ebi-a-GCST90017042	Gut microbiota abundance (genus Peptococcus id.2037)	NA	European	NA	2021	5350051	14306	NA	NA	NA	NA	Kurilshikov A	33462485	NA	NA	NA	NA
ubm-a-2408	NET100 1252	NA	European	Males	2018	11734354	7916	NA	NA	Continuous	Psychiatric / neurological	Elliott LT	30305740	NA	NA	NA	NA
ubm-a-1682	NET100 0526	NA	European	Males	2018	11734354	7916	NA	NA	Continuous	Psychiatric / neurological	Elliott LT	30305740	NA	NA	NA	NA
ukb-a-95	Non-cancer illness code self-reported: enlarged prostate	Neale Lab	European	Males and Females	2017	10894596	337159	4609	332550	NA	NA	Neale	NA	NA	SD	NA	NA
ubm-a-261	IDP dMRI TBSS MD Anterior limb of internal capsule L	NA	European	Males	2018	11734354	7532	NA	NA	Continuous	Psychiatric / neurological	Elliott LT	30305740	NA	NA	NA	NA
finn-b-M13_BURSELBOWOTH	Other bursitis of elbow	NA	European	Males and Females	2021	16380305	NA	82	167641	Binary	NA	NA	NA	NA	NA	NA	M13_BURSELBOWOTH
prot-a-2394	Probable inactive serine protease 37	NA	European	Males and Females	2018	10534735	3301	NA	NA	Immune system	Protein	Sun BB	29875488	NA	NA	NA	NA
ubm-a-340	IDP dMRI TBSS L1 Middle cerebellar peduncle	NA	European	Males	2018	11734354	7532	NA	NA	Continuous	Psychiatric / neurological	Elliott LT	30305740	NA	NA	NA	NA
prot-c-3040_59_1	MIP-1a	NA	European	Males and Females	2019	501428	NA	NA	NA	Continuous	NA	Suhre K	28240269	EFO_0007937	NA	NA	name=C-C motif chemokine 3; chr=17; start=36088256; end=36090502; entrez=6348; uniprot=P10147
ukb-b-19086	Diagnoses - secondary ICD10: R50.9 Fever, unspecified	MRC-IEU	European	Males and Females	2018	9851867	463010	1794	461216	Binary	NA	Ben Elsworth	NA	NA	SD	NA	41204#R509: Output from GWAS pipeline using Phesant derived variables from UKBiobank
ubm-a-1185	NET100 0029	NA	European	Males	2018	11734354	7916	NA	NA	Continuous	Psychiatric / neurological	Elliott LT	30305740	NA	NA	NA	NA
ubm-a-2174	NET100 1018	NA	European	Males	2018	11734354	7916	NA	NA	Continuous	Psychiatric / neurological	Elliott LT	30305740	NA	NA	NA	NA
met-a-449	N-acetylglycine	NA	European	Males and Females	2014	2545572	7135	NA	NA	Metabolites	Amino acid	Shin	24816252	NA	log10 units	0.247303	NA
finn-b-CD2_BENIGN_SKIN_LOWERLIMB	Benign neoplasm: Skin of lower limb, including hip	NA	European	Males and Females	2021	16380466	NA	349	218443	Binary	NA	NA	NA	NA	NA	NA	CD2_BENIGN_SKIN_LOWERLIMB
prot-a-2696	Plasminogen activator inhibitor 1	NA	European	Males and Females	2018	10534735	3301	NA	NA	Immune system	Protein	Sun BB	29875488	NA	NA	NA	NA
finn-b-KRA_PSY_SPEELING	Speech and linguistic disorders	NA	European	Males and Females	2021	16380466	NA	1312	217480	Binary	NA	NA	NA	NA	NA	NA	KRA_PSY_SPEELING
ukb-b-6740	Current employment status: In paid employment or self-employed	MRC-IEU	European	Males and Females	2018	9851867	461242	263827	197415	Binary	NA	Ben Elsworth	NA	NA	SD	NA	6142#1: Output from GWAS pipeline using Phesant derived variables from UKBiobank
prot-a-1970	Mitochondrial ubiquitin ligase activator of NFKB 1	NA	European	Males and Females	2018	10534735	3301	NA	NA	Immune system	Protein	Sun BB	29875488	NA	NA	NA	NA
prot-a-2385	Phosphoribosyl pyrophosphate synthase-associated protein 1	NA	European	Males and Females	2018	10534735	3301	NA	NA	Immune system	Protein	Sun BB	29875488	NA	NA	NA	NA
finn-b-C3_CONNECTIVE_SOFT_NAS_EXALLC	Malignant neoplasm of other connective and soft tissue (all cancers excluded)	NA	European	Males and Females	2021	16380309	NA	275	174006	Binary	NA	NA	NA	NA	NA	NA	C3_CONNECTIVE_SOFT_NAS_EXALLC
prot-a-1959	S-methyl-5'-thioadenosine phosphorylase	NA	European	Males and Females	2018	10534735	3301	NA	NA	Immune system	Protein	Sun BB	29875488	NA	NA	NA	NA
prot-c-3388_58_2	PAK7	NA	European	Males and Females	2019	501428	NA	NA	NA	Continuous	NA	Suhre K	28240269	EFO_0007937	NA	NA	name=Serine/threonine-protein kinase PAK 7; chr=20; start=9537389; end=9839041; entrez=57144; uniprot=Q9P286
ebi-a-GCST90000480	Interleukin-8 levels	NA	European	NA	2020	7883879	982	NA	NA	NA	NA	Hillary RF	32641083	NA	NA	NA	NA
prot-a-2539	Transforming protein RhoA	NA	European	Males and Females	2018	10534735	3301	NA	NA	Immune system	Protein	Sun BB	29875488	NA	NA	NA	NA
ubm-a-2661	volume Left-Caudate	NA	European	Males	2018	11734354	8411	NA	NA	Continuous	Psychiatric / neurological	Elliott LT	30305740	NA	NA	NA	NA
met-d-Ala	Alanine	NA	European	Males and Females	2020	12321875	115074	NA	NA	Continuous	NA	Borges CM	NA	NA	NA	NA	NA
ubm-a-474	IDP dMRI TBSS L3 Fornix cres+Stria terminalis R	NA	European	Males	2018	11734354	7532	NA	NA	Continuous	Psychiatric / neurological	Elliott LT	30305740	NA	NA	NA	NA
ebi-a-GCST90011422	OTU99_11 (Parabacteroides) abundance	NA	European	NA	2021	5483018	8956	NA	NA	NA	NA	R<U+00FC>hlemann MC	33462482	NA	NA	NA	NA
finn-b-F5_EMOPER	Emotionally unstable personality disorder	NA	European	Males and Females	2021	16380456	NA	2637	212179	Binary	NA	NA	NA	NA	NA	NA	F5_EMOPER
prot-a-2078	N-terminal pro-BNP	NA	European	Males and Females	2018	10534735	3301	NA	NA	Immune system	Protein	Sun BB	29875488	NA	NA	NA	NA
ebi-a-GCST90016959	Gut microbiota abundance (genus Actinomyces id.423)	NA	European	NA	2021	5417207	14306	NA	NA	NA	NA	Kurilshikov A	33462485	NA	NA	NA	NA
ukb-b-6811	Time spent outdoors in winter	MRC-IEU	European	Males and Females	2018	9851867	364465	NA	NA	Categorical Ordered	NA	Ben Elsworth	NA	NA	SD	NA	1060: Output from GWAS pipeline using Phesant derived variables from UKBiobank
ubm-a-62	IDP T1 FAST ROIs L supramarg gyrus ant	NA	European	Males	2018	11734354	8427	NA	NA	Continuous	Psychiatric / neurological	Elliott LT	30305740	NA	NA	NA	NA
finn-b-I9_POSTAMI	Status post-ami	NA	European	Males and Females	2021	16380364	NA	1434	187840	Binary	NA	NA	NA	NA	NA	NA	I9_POSTAMI
prot-c-3414_40_2	BMX	NA	European	Males and Females	2019	501428	NA	NA	NA	Continuous	NA	Suhre K	28240269	EFO_0007937	NA	NA	name=Cytoplasmic tyrosine-protein kinase BMX; chr=X; start=15464246; end=15556529; entrez=660; uniprot=P51813
ubm-a-2486	NET100 1330	NA	European	Males	2018	11734354	7916	NA	NA	Continuous	Psychiatric / neurological	Elliott LT	30305740	NA	NA	NA	NA
ebi-a-GCST005061	Serum alkaline phosphatase levels	NA	European	NA	2017	15163672	9733	NA	NA	NA	NA	Prins BP	28887542	NA	NA	NA	NA
prot-a-2702	Serpin I2	NA	European	Males and Females	2018	10534735	3301	NA	NA	Immune system	Protein	Sun BB	29875488	NA	NA	NA	NA
ukb-d-20417	Tense, sore, or aching muscles during worst period of anxiety	NA	European	Males and Females	2018	13540400	33301	12996	20305	Binary	NA	Neale lab	NA	NA	NA	NA	NA
prot-a-1234	Progonadoliberin-2	NA	European	Males and Females	2018	10534735	3301	NA	NA	Immune system	Protein	Sun BB	29875488	NA	NA	NA	NA
ukb-b-18377	Leg fat percentage (left)	MRC-IEU	European	Males and Females	2018	9851867	454826	NA	NA	Continuous	NA	Ben Elsworth	NA	NA	SD	NA	23115: Output from GWAS pipeline using Phesant derived variables from UKBiobank
ukb-a-514	Frequency of stair climbing in last 4 weeks	Neale Lab	European	Males and Females	2017	10894596	334169	NA	NA	NA	NA	Neale	NA	NA	SD	NA	NA
ebi-a-GCST90001888	CD28 on CD39+ secreting CD4 regulatory T cell	NA	European	NA	2020	14849646	2920	NA	NA	NA	NA	Orr<U+00F9> V	32929287	NA	NA	NA	NA
ukb-d-5843_1	Which eye(s) affected by myopia (short sight): Right eye	NA	European	Males and Females	2018	10084759	29317	1607	27710	Binary	NA	Neale lab	NA	NA	NA	NA	NA
met-d-S_VLDL_P	Concentration of small VLDL particles	NA	European	Males and Females	2020	12321875	115078	NA	NA	Continuous	NA	Borges CM	NA	NA	NA	NA	NA
ebi-a-GCST005531	Multiple sclerosis	NA	European	NA	2013	132089	38582	14498	24091	NA	NA	Beecham AH	24076602	NA	logOR	NA	beta+se converted from OR+CI;
ukb-b-5855	Carer support indicators: No	MRC-IEU	European	Males and Females	2018	9851867	54277	52130	2147	Binary	NA	Ben Elsworth	NA	NA	SD	NA	41214#2: Output from GWAS pipeline using Phesant derived variables from UKBiobank
ubm-a-1469	NET100 0313	NA	European	Males	2018	11734354	7916	NA	NA	Continuous	Psychiatric / neurological	Elliott LT	30305740	NA	NA	NA	NA
ukb-a-508	Number of days/week of moderate physical activity 10+ minutes	Neale Lab	European	Males and Females	2017	10894596	321309	NA	NA	NA	NA	Neale	NA	NA	SD	NA	NA
prot-a-156	Rho guanine nucleotide exchange factor 2	NA	European	Males and Females	2018	10534735	3301	NA	NA	Immune system	Protein	Sun BB	29875488	NA	NA	NA	NA
prot-c-4931_59_1	TF	NA	European	Males and Females	2019	501428	NA	NA	NA	Continuous	NA	Suhre K	28240269	EFO_0007937	NA	NA	name=Tissue Factor; chr=1; start=94529225; end=94541800; entrez=2152; uniprot=P13726
ebi-a-GCST004436	Macrophage colony stimulating factor levels	NA	European	NA	2016	9184521	840	NA	NA	NA	NA	Ahola-Olli AV	27989323	NA	NA	NA	NA
ubm-a-956	NET25 0010	NA	European	Males	2018	11734354	7916	NA	NA	Continuous	Psychiatric / neurological	Elliott LT	30305740	NA	NA	NA	NA
ukb-a-204	Illnesses of father: Prostate cancer	Neale Lab	European	Males and Females	2017	10894596	292053	22534	270176	NA	NA	Neale	NA	NA	SD	NA	NA
finn-b-E4_GILBERT	Gilbert syndrome	NA	European	Males and Females	2021	16380377	NA	88	197259	Binary	NA	NA	NA	NA	NA	NA	E4_GILBERT
ubm-a-2355	NET100 1199	NA	European	Males	2018	11734354	7916	NA	NA	Continuous	Psychiatric / neurological	Elliott LT	30305740	NA	NA	NA	NA
finn-b-R18_MALAI_FATIG	Malaise and fatigue	NA	European	Males and Females	2021	16380305	NA	7363	172999	Binary	NA	NA	NA	NA	NA	NA	R18_MALAI_FATIG
ubm-a-2046	NET100 0890	NA	European	Males	2018	11734354	7916	NA	NA	Continuous	Psychiatric / neurological	Elliott LT	30305740	NA	NA	NA	NA
met-b-127	T:%Vg9+Vd2-low	NA	European	Females	2015	1625291	497	NA	NA	Immune system	Immune cell subset frequency	Roederer	25772697	NA	%	14.7952	Female twins
met-d-L_HDL_TG_pct	Triglycerides to total lipids ratio in large HDL	NA	European	Males and Females	2020	12321875	115078	NA	NA	Continuous	NA	Borges CM	NA	NA	NA	NA	NA
ubm-a-2123	NET100 0967	NA	European	Males	2018	11734354	7916	NA	NA	Continuous	Psychiatric / neurological	Elliott LT	30305740	NA	NA	NA	NA
ukb-b-17733	Operation code: colposcopy +/- biopsy	MRC-IEU	European	Males and Females	2018	9851867	462933	1994	460939	Binary	NA	Ben Elsworth	NA	NA	SD	NA	20004#1522: Output from GWAS pipeline using Phesant derived variables from UKBiobank
met-c-929	Total lipids in small VLDL	NA	European	Males and Females	2016	11817034	19273	NA	NA	Metabolites	Lipid	Kettunen	27005778	NA	SD	NA	S.VLDL.L
met-a-391	X-04495	NA	European	Males and Females	2014	2545543	7490	NA	NA	Metabolites	Unknown metabolite	Shin	24816252	NA	log10 units	0.183515	NA
ebi-a-GCST90001553	Naive CD8+ T cell %T cell	NA	European	NA	2020	15141588	3427	NA	NA	NA	NA	Orr<U+00F9> V	32929287	NA	NA	NA	NA
ubm-a-1172	NET100 0016	NA	European	Males	2018	11734354	7916	NA	NA	Continuous	Psychiatric / neurological	Elliott LT	30305740	NA	NA	NA	NA
finn-b-M13_OSTEOMYELITIS	Osteomyelitis	NA	European	Males and Females	2021	16380449	NA	842	209575	Binary	NA	NA	NA	NA	NA	NA	M13_OSTEOMYELITIS
ukb-b-17579	Why reduced smoking: Doctor's advice	MRC-IEU	European	Males and Females	2018	9851867	14951	2122	12829	Binary	NA	Ben Elsworth	NA	NA	SD	NA	6158#2: Output from GWAS pipeline using Phesant derived variables from UKBiobank
ubm-a-1344	NET100 0188	NA	European	Males	2018	11734354	7916	NA	NA	Continuous	Psychiatric / neurological	Elliott LT	30305740	NA	NA	NA	NA
ebi-a-GCST90016999	Gut microbiota abundance (genus Eubacterium fissicatena group id.14373)	NA	European	NA	2021	5159588	14306	NA	NA	NA	NA	Kurilshikov A	33462485	NA	NA	NA	NA
finn-b-G6_CARPTU	Carpal tunnel syndrome	NA	European	Males and Females	2021	16380439	NA	11208	195047	Binary	NA	NA	NA	NA	NA	NA	G6_CARPTU
prot-a-3100	Trem-like transcript 2 protein	NA	European	Males and Females	2018	10534735	3301	NA	NA	Immune system	Protein	Sun BB	29875488	NA	NA	NA	NA
ukb-d-22609_0	Workplace very dusty: Rarely/never	NA	European	Males and Females	2018	13566662	90543	81462	9081	Binary	NA	Neale lab	NA	NA	NA	NA	NA
prot-a-3006	Transmembrane protein 234	NA	European	Males and Females	2018	10534735	3301	NA	NA	Immune system	Protein	Sun BB	29875488	NA	NA	NA	NA
finn-b-RHEUMA_SEROPOS_OTH	Other/unspecified seropositiverheumatoid arthritis	NA	European	Males and Females	2021	16380466	NA	4539	214196	Binary	NA	NA	NA	NA	NA	NA	RHEUMA_SEROPOS_OTH
prot-a-1355	Hydroxymethylglutaryl-CoA synthase, cytoplasmic	NA	European	Males and Females	2018	10534735	3301	NA	NA	Immune system	Protein	Sun BB	29875488	NA	NA	NA	NA
ubm-a-1201	NET100 0045	NA	European	Males	2018	11734354	7916	NA	NA	Continuous	Psychiatric / neurological	Elliott LT	30305740	NA	NA	NA	NA
met-a-504	X-11381	NA	European	Males and Females	2014	2545628	7753	NA	NA	Metabolites	Unknown metabolite	Shin	24816252	NA	log10 units	0.126268	NA
ebi-a-GCST90001847	CD3 on HLA DR+ T cell	NA	European	NA	2020	14891166	3060	NA	NA	NA	NA	Orr<U+00F9> V	32929287	NA	NA	NA	NA
ukb-b-8517	Non-cancer illness code, self-reported: urinary frequency / incontinence	MRC-IEU	European	Males and Females	2018	9851867	462933	1624	461309	Binary	NA	Ben Elsworth	NA	NA	SD	NA	20002#1202: Output from GWAS pipeline using Phesant derived variables from UKBiobank
prot-a-489	Cadherin-related family member 3	NA	European	Males and Females	2018	10534735	3301	NA	NA	Immune system	Protein	Sun BB	29875488	NA	NA	NA	NA
finn-b-GOUT_KIDNEY	Gout due to impairment of renal function	NA	European	Males and Females	2021	16380463	NA	92	215216	Binary	NA	NA	NA	NA	NA	NA	GOUT_KIDNEY
ukb-b-20379	Medication for cholesterol, blood pressure, diabetes, or take exogenous hormones: None of the above	MRC-IEU	European	Males and Females	2018	9851867	249710	172332	77378	Binary	NA	Ben Elsworth	NA	NA	SD	NA	6153#100: Output from GWAS pipeline using Phesant derived variables from UKBiobank
ubm-a-2742	DKTatlas lh superiortemporal area	NA	European	Males	2018	11734354	8411	NA	NA	Continuous	Psychiatric / neurological	Elliott LT	30305740	NA	NA	NA	NA
ukb-b-4964	Other bread intake	MRC-IEU	European	Males and Females	2018	9851867	64949	NA	NA	Categorical Ordered	NA	Ben Elsworth	NA	NA	SD	NA	101270: Output from GWAS pipeline using Phesant derived variables from UKBiobank
ebi-a-GCST90002097	CD11b on CD33+ HLA DR+ CD14dim	NA	European	NA	2020	14127355	1578	NA	NA	NA	NA	Orr<U+00F9> V	32929287	NA	NA	NA	NA
finn-b-M13_BURSITISHIPOTH	Other bursitis of hip	NA	European	Males and Females	2021	16380306	NA	246	167641	Binary	NA	NA	NA	NA	NA	NA	M13_BURSITISHIPOTH
ukb-b-1511	Operative procedures - main OPCS: H20.1 Fibreoptic endoscopic snare resection of lesion of colon	MRC-IEU	European	Males and Females	2018	9851867	463010	5243	457767	Binary	NA	Ben Elsworth	NA	NA	SD	NA	41200#H201: Output from GWAS pipeline using Phesant derived variables from UKBiobank
prot-a-982	ERO1-like protein alpha	NA	European	Males and Females	2018	10534735	3301	NA	NA	Immune system	Protein	Sun BB	29875488	NA	NA	NA	NA
prot-a-709	Transcriptional repressor CTCF	NA	European	Males and Females	2018	10534735	3301	NA	NA	Immune system	Protein	Sun BB	29875488	NA	NA	NA	NA
finn-b-CD2_BENIGN_INTRATHORACIC	Benign neoplasm of other and unspecified intrathoracic organs	NA	European	Males and Females	2021	16380466	NA	140	218652	Binary	NA	NA	NA	NA	NA	NA	CD2_BENIGN_INTRATHORACIC
prot-a-1605	Transcription factor AP-1	NA	European	Males and Females	2018	10534735	3301	NA	NA	Immune system	Protein	Sun BB	29875488	NA	NA	NA	NA
ebi-a-GCST005921	Family history of Alzheimer's disease	NA	European	NA	2018	7746640	314278	NA	NA	NA	NA	Marioni RE	29777097	NA	NA	NA	NA
finn-b-I9_ARTEMBTHR_EXNONE	Arterial embolism and thrombosis (no controls excluded)	NA	European	Males and Females	2021	16380466	NA	789	218003	Binary	NA	NA	NA	NA	NA	NA	I9_ARTEMBTHR_EXNONE
prot-a-416	Cyclin-H	NA	European	Males and Females	2018	10534735	3301	NA	NA	Immune system	Protein	Sun BB	29875488	NA	NA	NA	NA
ukb-b-3498	Operation code: discectomy	MRC-IEU	European	Males and Females	2018	9851867	462933	1667	461266	Binary	NA	Ben Elsworth	NA	NA	SD	NA	20004#1531: Output from GWAS pipeline using Phesant derived variables from UKBiobank
ukb-b-1234	Doctor diagnosed chronic bronchitis	MRC-IEU	European	Males and Females	2018	9851867	112583	1273	111310	Binary	NA	Ben Elsworth	NA	NA	SD	NA	22129: Output from GWAS pipeline using Phesant derived variables from UKBiobank
finn-b-F5_PERSMOOD	Persistent mood disorders	NA	European	Males and Females	2021	16380365	NA	3901	192220	Binary	NA	NA	NA	NA	NA	NA	F5_PERSMOOD
ukb-b-12617	PCT responsible for patient data: MANCHESTER PCT	MRC-IEU	European	Males and Females	2018	9851867	463010	2506	460504	Binary	NA	Ben Elsworth	NA	NA	SD	NA	41229#5NT: Output from GWAS pipeline using Phesant derived variables from UKBiobank
prot-c-4271_75_2	PFD5	NA	European	Males and Females	2019	501428	NA	NA	NA	Continuous	NA	Suhre K	28240269	EFO_0007937	NA	NA	name=Prefoldin subunit 5; chr=12; start=53295291; end=53299450; entrez=5204; uniprot=Q99471
ubm-a-471	IDP dMRI TBSS L3 Cingulum cingulate gyrus L	NA	European	Males	2018	11734354	7532	NA	NA	Continuous	Psychiatric / neurological	Elliott LT	30305740	NA	NA	NA	NA
ukb-b-1585	Diagnoses - secondary ICD10: Z86.4 Personal history of psychoactive substance abuse	MRC-IEU	European	Males and Females	2018	9851867	463010	11793	451217	Binary	NA	Ben Elsworth	NA	NA	SD	NA	41204#Z864: Output from GWAS pipeline using Phesant derived variables from UKBiobank
prot-a-2144	Olfactomedin-like protein 3	NA	European	Males and Females	2018	10534735	3301	NA	NA	Immune system	Protein	Sun BB	29875488	NA	NA	NA	NA
ebi-a-GCST90002060	CD8 on HLA DR+ CD8+ T cell	NA	European	NA	2020	14891166	3060	NA	NA	NA	NA	Orr<U+00F9> V	32929287	NA	NA	NA	NA
ubm-a-1767	NET100 0611	NA	European	Males	2018	11734354	7916	NA	NA	Continuous	Psychiatric / neurological	Elliott LT	30305740	NA	NA	NA	NA
finn-b-CHOLELITH_BROAD	Cholelithiasis, broad definition with cholecystitis	NA	European	Males and Females	2021	16380454	NA	19883	195144	Binary	NA	NA	NA	NA	NA	NA	CHOLELITH_BROAD
ukb-d-1707_1	Handedness (chirality/laterality): Right-handed	NA	European	Males and Females	2018	13586570	360913	320242	40671	Binary	NA	Neale lab	NA	NA	NA	NA	NA
prot-a-2688	Protein Z-dependent protease inhibitor	NA	European	Males and Females	2018	10534735	3301	NA	NA	Immune system	Protein	Sun BB	29875488	NA	NA	NA	NA
ukb-b-8668	Treatment/medication code: doxazosin	MRC-IEU	European	Males and Females	2018	9851867	462933	5176	457757	Binary	NA	Ben Elsworth	NA	NA	SD	NA	20003#1140879778: Output from GWAS pipeline using Phesant derived variables from UKBiobank
met-a-610	X-12442--5,8-tetradecadienoate	NA	European	Males and Females	2014	2545631	7780	NA	NA	Metabolites	Lipid	Shin	24816252	NA	log10 units	0.225772	NA
prot-b-64	endothelial cell specific molecule 1	NA	European	Males and Females	2018	5270646	3394	NA	NA	Immune system	Protein	Folkersen L	28369058	NA	NA	NA	NA
ubm-a-533	IDP dMRI TBSS OD Pontine crossing tract	NA	European	Males	2018	11734354	7532	NA	NA	Continuous	Psychiatric / neurological	Elliott LT	30305740	NA	NA	NA	NA
prot-a-332	Carbonic anhydrase 5A, mitochondrial	NA	European	Males and Females	2018	10534735	3301	NA	NA	Immune system	Protein	Sun BB	29875488	NA	NA	NA	NA
ubm-a-1232	NET100 0076	NA	European	Males	2018	11734354	7916	NA	NA	Continuous	Psychiatric / neurological	Elliott LT	30305740	NA	NA	NA	NA
prot-a-925	Eukaryotic translation initiation factor 4 gamma 3	NA	European	Males and Females	2018	10534735	3301	NA	NA	Immune system	Protein	Sun BB	29875488	NA	NA	NA	NA
ukb-b-8210	Non-cancer illness code, self-reported: crohns disease	MRC-IEU	European	Males and Females	2018	9851867	462933	1401	461532	Binary	NA	Ben Elsworth	NA	NA	SD	NA	20002#1462: Output from GWAS pipeline using Phesant derived variables from UKBiobank
met-b-187	CD8:%Act(25+38+RO+)	NA	European	Females	2015	1627827	497	NA	NA	Immune system	Immune cell subset frequency	Roederer	25772697	NA	%	0.2072	Female twins
prot-c-3050_7_2	vWF	NA	European	Males and Females	2019	501428	NA	NA	NA	Continuous	NA	Suhre K	28240269	EFO_0007937	NA	NA	name=von Willebrand factor; chr=12; start=5948874; end=6124770; entrez=7450; uniprot=P04275
finn-b-P16_RESPI_DISTR_NEWBO	Respiratory distress of newborn	NA	European	Males and Females	2021	16380461	NA	171	218527	Binary	NA	NA	NA	NA	NA	NA	P16_RESPI_DISTR_NEWBO
ubm-a-854	IDP dMRI ProbtrackX ISOVF fma	NA	European	Males	2018	11734354	7532	NA	NA	Continuous	Psychiatric / neurological	Elliott LT	30305740	NA	NA	NA	NA
prot-a-738	C-X-C motif chemokine 10	NA	European	Males and Females	2018	10534735	3301	NA	NA	Immune system	Protein	Sun BB	29875488	NA	NA	NA	NA
prot-a-2806	Sperm-associated antigen 11A	NA	European	Males and Females	2018	10534735	3301	NA	NA	Immune system	Protein	Sun BB	29875488	NA	NA	NA	NA
finn-b-D3_KELA_IMMUDEF	Kela reimbursement Agammaglobulinemia (D80-84)	NA	European	Males and Females	2021	16380457	NA	113	215712	Binary	NA	NA	NA	NA	NA	NA	D3_KELA_IMMUDEF
finn-b-I9_HYPTENSRD	Hypertensive Renal Disease	NA	European	Males and Females	2021	16380163	NA	468	162837	Binary	NA	NA	NA	NA	NA	NA	I9_HYPTENSRD
finn-b-D3_IMMUDEFANTIBODY	Immunodeficiency with predominantly antibody defects	NA	European	Males and Females	2021	16380457	NA	368	215712	Binary	NA	NA	NA	NA	NA	NA	D3_IMMUDEFANTIBODY
ebi-a-GCST90001851	CD3 on T cell	NA	European	NA	2020	14849624	2919	NA	NA	NA	NA	Orr<U+00F9> V	32929287	NA	NA	NA	NA
prot-a-2219	cGMP-dependent 3',5'-cyclic phosphodiesterase	NA	European	Males and Females	2018	10534735	3301	NA	NA	Immune system	Protein	Sun BB	29875488	NA	NA	NA	NA
ubm-a-2223	NET100 1067	NA	European	Males	2018	11734354	7916	NA	NA	Continuous	Psychiatric / neurological	Elliott LT	30305740	NA	NA	NA	NA
prot-a-1508	Interleukin-22 receptor subunit alpha-1	NA	European	Males and Females	2018	10534735	3301	NA	NA	Immune system	Protein	Sun BB	29875488	NA	NA	NA	NA
ebi-a-GCST90001651	Granulocyte Absolute Count	NA	European	NA	2020	15195758	3653	NA	NA	NA	NA	Orr<U+00F9> V	32929287	NA	NA	NA	NA
ebi-a-GCST90012031	Myeloperoxidase levels	NA	European	NA	2020	13138585	21758	NA	NA	NA	NA	Folkersen L	33067605	NA	NA	NA	NA
finn-b-Z21_PREGNAC_EXAM_TEST	Pregnancy examination and test	NA	European	Males and Females	2021	16378974	NA	5127	90131	Binary	NA	NA	NA	NA	NA	NA	Z21_PREGNAC_EXAM_TEST
ukb-d-20079_6	Day-of-week questionnaire completion requested: Saturday	NA	European	Males and Females	2018	13055796	51427	8844	42583	Binary	NA	Neale lab	NA	NA	NA	NA	NA
prot-a-434	CMRF35-like molecule 6	NA	European	Males and Females	2018	10534735	3301	NA	NA	Immune system	Protein	Sun BB	29875488	NA	NA	NA	NA
finn-b-OSTPOPATFRCTURE_POSTEMENO	Postmenopausal osteoporosis with pathological fracture	NA	European	Males and Females	2021	16379783	NA	621	122861	Binary	NA	NA	NA	NA	NA	NA	OSTPOPATFRCTURE_POSTEMENO
ukb-b-10565	Tinned tomato intake	MRC-IEU	European	Males and Females	2018	9851867	64949	NA	NA	Categorical Ordered	NA	Ben Elsworth	NA	NA	SD	NA	104350: Output from GWAS pipeline using Phesant derived variables from UKBiobank
ukb-d-20114_101	Illnesses of adopted siblings: None of the above (group 2)	NA	European	Males and Females	2018	10051536	1869	1577	292	Binary	NA	Neale lab	NA	NA	NA	NA	NA
ubm-a-1631	NET100 0475	NA	European	Males	2018	11734354	7916	NA	NA	Continuous	Psychiatric / neurological	Elliott LT	30305740	NA	NA	NA	NA
ukb-b-6873	PCT responsible for patient data: WESTERN CHESHIRE PCT	MRC-IEU	European	Males and Females	2018	9851867	463010	1128	461882	Binary	NA	Ben Elsworth	NA	NA	SD	NA	41229#5NN: Output from GWAS pipeline using Phesant derived variables from UKBiobank
finn-b-E4_GOITREMULTINOD	Nontoxic multinodular goitre	NA	European	Males and Females	2021	16380390	NA	3432	187684	Binary	NA	NA	NA	NA	NA	NA	E4_GOITREMULTINOD
ebi-a-GCST90012111	Sex hormone-binding globulin levels	NA	European	NA	2020	16137172	370125	NA	NA	NA	NA	Ruth KS	32042192	NA	NA	NA	NA
prot-a-1497	Interleukin-1 receptor type 2	NA	European	Males and Females	2018	10534735	3301	NA	NA	Immune system	Protein	Sun BB	29875488	NA	NA	NA	NA
ubm-a-1697	NET100 0541	NA	European	Males	2018	11734354	7916	NA	NA	Continuous	Psychiatric / neurological	Elliott LT	30305740	NA	NA	NA	NA
ukb-b-16892	Treatment/medication code: evening primrose oil	MRC-IEU	European	Males and Females	2018	9851867	462933	7307	455626	Binary	NA	Ben Elsworth	NA	NA	SD	NA	20003#1140916682: Output from GWAS pipeline using Phesant derived variables from UKBiobank
ubm-a-2320	NET100 1164	NA	European	Males	2018	11734354	7916	NA	NA	Continuous	Psychiatric / neurological	Elliott LT	30305740	NA	NA	NA	NA
prot-c-4919_56_2	LIF sR	NA	European	Males and Females	2019	501428	NA	NA	NA	Continuous	NA	Suhre K	28240269	EFO_0007937	NA	NA	name=Leukemia inhibitory factor receptor; chr=5; start=38474963; end=38608354; entrez=3977; uniprot=P42702
finn-b-J10_PULMEOS	Pulmonary eosinophilia, not elsewhere classified	NA	European	Males and Females	2021	16380461	NA	175	216363	Binary	NA	NA	NA	NA	NA	NA	J10_PULMEOS
ukb-b-15686	Diagnoses - secondary ICD10: I20.9 Angina pectoris, unspecified	MRC-IEU	European	Males and Females	2018	9851867	463010	10083	452927	Binary	NA	Ben Elsworth	NA	NA	SD	NA	41204#I209: Output from GWAS pipeline using Phesant derived variables from UKBiobank
ubm-a-2597	NET100 1441	NA	European	Males	2018	11734354	7916	NA	NA	Continuous	Psychiatric / neurological	Elliott LT	30305740	NA	NA	NA	NA
ebi-a-GCST90011700	TestASV_26 (Phascolarctobacterium) prevalence	NA	European	NA	2021	5380057	8956	NA	NA	NA	NA	R<U+00FC>hlemann MC	33462482	NA	NA	NA	NA
prot-a-1878	Multiple epidermal growth factor-like domains protein 10	NA	European	Males and Females	2018	10534735	3301	NA	NA	Immune system	Protein	Sun BB	29875488	NA	NA	NA	NA
prot-a-2135	Out at first protein homolog	NA	European	Males and Females	2018	10534735	3301	NA	NA	Immune system	Protein	Sun BB	29875488	NA	NA	NA	NA
ubm-a-2416	NET100 1260	NA	European	Males	2018	11734354	7916	NA	NA	Continuous	Psychiatric / neurological	Elliott LT	30305740	NA	NA	NA	NA
prot-a-747	Gro-beta/gamma	NA	European	Males and Females	2018	10534735	3301	NA	NA	Immune system	Protein	Sun BB	29875488	NA	NA	NA	NA
ukb-d-M48	Diagnoses - main ICD10: M48 Other spondylopathies	NA	European	Males and Females	2018	10484433	361194	1890	359304	Binary	NA	Neale lab	NA	NA	NA	NA	NA
prot-a-337	Cell adhesion molecule 1	NA	European	Males and Females	2018	10534735	3301	NA	NA	Immune system	Protein	Sun BB	29875488	NA	NA	NA	NA
prot-a-2996	Transmembrane protein 119	NA	European	Males and Females	2018	10534735	3301	NA	NA	Immune system	Protein	Sun BB	29875488	NA	NA	NA	NA
ubm-a-2132	NET100 0976	NA	European	Males	2018	11734354	7916	NA	NA	Continuous	Psychiatric / neurological	Elliott LT	30305740	NA	NA	NA	NA
prot-b-53	C-C motif chemokine ligand 3	NA	European	Males and Females	2018	5270646	3394	NA	NA	Immune system	Protein	Folkersen L	28369058	NA	NA	NA	NA
prot-a-2740	S-phase kinase-associated protein 1	NA	European	Males and Females	2018	10534735	3301	NA	NA	Immune system	Protein	Sun BB	29875488	NA	NA	NA	NA
ubm-a-2333	NET100 1177	NA	European	Males	2018	11734354	7916	NA	NA	Continuous	Psychiatric / neurological	Elliott LT	30305740	NA	NA	NA	NA
met-c-838	Acetoacetate	NA	European	Males and Females	2016	11809755	19262	NA	NA	Metabolites	Keto acid	Kettunen	27005778	NA	SD	NA	AcAce
ieu-b-4902	Anti-Feline herpes virus IgG levels	NA	European	Males and Females	2021	7002835	2764	NA	NA	NA	NA	Chong A	NA	NA	NA	NA	ALSPAC clinic - Focus@7
ubm-a-462	IDP dMRI TBSS L3 Posterior corona radiata R	NA	European	Males	2018	11734354	7532	NA	NA	Continuous	Psychiatric / neurological	Elliott LT	30305740	NA	NA	NA	NA
finn-b-Z21_ATTN_ARTIF_OPENI	Attention to artificial openings	NA	European	Males and Females	2021	16380382	NA	386	193570	Binary	NA	NA	NA	NA	NA	NA	Z21_ATTN_ARTIF_OPENI
prot-a-1633	Uncharacterized protein KIAA1467	NA	European	Males and Females	2018	10534735	3301	NA	NA	Immune system	Protein	Sun BB	29875488	NA	NA	NA	NA
ukb-b-18157	Type of cancer: ICD10: C56 Malignant neoplasm of ovary	MRC-IEU	European	Males and Females	2018	9851867	463010	1087	461923	Binary	NA	Ben Elsworth	NA	NA	SD	NA	40006#C56: Output from GWAS pipeline using Phesant derived variables from UKBiobank
prot-a-27	Disintegrin and metalloproteinase domain-containing protein 19	NA	European	Males and Females	2018	10534735	3301	NA	NA	Immune system	Protein	Sun BB	29875488	NA	NA	NA	NA
ubm-a-877	NODEamps25 0007	NA	European	Males	2018	11734354	7916	NA	NA	Continuous	Psychiatric / neurological	Elliott LT	30305740	NA	NA	NA	NA
prot-a-41	Pituitary adenylate cyclase-activating polypeptide 38	NA	European	Males and Females	2018	10534735	3301	NA	NA	Immune system	Protein	Sun BB	29875488	NA	NA	NA	NA
finn-b-D3_EOSINOPHILIA	Eosinophilia	NA	European	Males and Females	2021	16380463	NA	182	215755	Binary	NA	NA	NA	NA	NA	NA	D3_EOSINOPHILIA
prot-a-3228	WAP, Kazal, immunoglobulin, Kunitz and NTR domain-containing protein 2	NA	European	Males and Females	2018	10534735	3301	NA	NA	Immune system	Protein	Sun BB	29875488	NA	NA	NA	NA
ebi-a-GCST90001900	CD28 on resting CD4 regulatory T cell	NA	European	NA	2020	4824972	2919	NA	NA	NA	NA	Orr<U+00F9> V	32929287	NA	NA	NA	NA
prot-a-668	Cytokine receptor-like factor 2	NA	European	Males and Females	2018	10534735	3301	NA	NA	Immune system	Protein	Sun BB	29875488	NA	NA	NA	NA
ebi-a-GCST90001729	CD19 on IgD+ CD38+ B cell	NA	European	NA	2020	15048951	3657	NA	NA	NA	NA	Orr<U+00F9> V	32929287	NA	NA	NA	NA
ukb-b-13447	Non-cancer illness code, self-reported: chronic obstructive airways disease/copd	MRC-IEU	European	Males and Females	2018	9851867	462933	1605	461328	Binary	NA	Ben Elsworth	NA	NA	SD	NA	20002#1112: Output from GWAS pipeline using Phesant derived variables from UKBiobank
ebi-a-GCST90010168	Renin levels	NA	European	NA	2020	18166693	1301	NA	NA	NA	NA	Gilly A	33303764	NA	NA	NA	NA
ebi-a-GCST90011626	OTU99_12 (Bacteroides) prevalence	NA	European	NA	2021	5438111	8956	NA	NA	NA	NA	R<U+00FC>hlemann MC	33462482	NA	NA	NA	NA
ubm-a-1830	NET100 0674	NA	European	Males	2018	11734354	7916	NA	NA	Continuous	Psychiatric / neurological	Elliott LT	30305740	NA	NA	NA	NA
ubm-a-3095	a2009s rh G rectus thickness	NA	European	Males	2018	11734354	8411	NA	NA	Continuous	Psychiatric / neurological	Elliott LT	30305740	NA	NA	NA	NA
ukb-b-18915	PCT responsible for patient data: BROMLEY PCT	MRC-IEU	European	Males and Females	2018	9851867	463010	1657	461353	Binary	NA	Ben Elsworth	NA	NA	SD	NA	41229#5A7: Output from GWAS pipeline using Phesant derived variables from UKBiobank
ukb-b-20023	Plain cereal intake	MRC-IEU	European	Males and Females	2018	9851867	64949	NA	NA	Categorical Ordered	NA	Ben Elsworth	NA	NA	SD	NA	100830: Output from GWAS pipeline using Phesant derived variables from UKBiobank
finn-b-R18_COUGH	Cough	NA	European	Males and Females	2021	16380255	NA	7773	163123	Binary	NA	NA	NA	NA	NA	NA	R18_COUGH
ukb-b-16557	Type of fat/oil used in cooking: Dairy spread	MRC-IEU	European	Males and Females	2018	9851867	64949	1592	63357	Binary	NA	Ben Elsworth	NA	NA	SD	NA	20090#377: Output from GWAS pipeline using Phesant derived variables from UKBiobank
finn-b-L12_PRURITUS	Pruritus	NA	European	Males and Females	2021	16380424	NA	1370	198740	Binary	NA	NA	NA	NA	NA	NA	L12_PRURITUS
prot-c-3057_55_1	WISP-1	NA	European	Males and Females	2019	501428	NA	NA	NA	Continuous	NA	Suhre K	28240269	EFO_0007937	NA	NA	name=WNT1-inducible-signaling pathway protein 1; chr=8; start=133191039; end=133230344; entrez=8840; uniprot=O95388
finn-b-HYPOTHY_LEVOTHY	Hypothyroidism, levothyroxin purchases	NA	European	Males and Females	2021	16378418	NA	26064	59912	Binary	NA	NA	NA	NA	NA	NA	HYPOTHY_LEVOTHY
prot-c-4267_81_3	PESC	NA	European	Males and Females	2019	501428	NA	NA	NA	Continuous	NA	Suhre K	28240269	EFO_0007937	NA	NA	name=Pescadillo homolog; chr=22; start=30576625; end=30607083; entrez=23481; uniprot=O00541
ukb-d-Z42	Diagnoses - main ICD10: Z42 Follow-up care involving plastic surgery	NA	European	Males and Females	2018	10444808	361194	1963	359231	Binary	NA	Neale lab	NA	NA	NA	NA	NA
finn-b-M13_POLYMYO	Polymyositis	NA	European	Males and Females	2021	16380450	NA	119	213145	Binary	NA	NA	NA	NA	NA	NA	M13_POLYMYO
ubm-a-2611	NET100 1455	NA	European	Males	2018	11734354	7916	NA	NA	Continuous	Psychiatric / neurological	Elliott LT	30305740	NA	NA	NA	NA
prot-a-486	Cadherin-7	NA	European	Males and Females	2018	10534735	3301	NA	NA	Immune system	Protein	Sun BB	29875488	NA	NA	NA	NA
prot-a-1565	IQ domain-containing protein F1	NA	European	Males and Females	2018	10534735	3301	NA	NA	Immune system	Protein	Sun BB	29875488	NA	NA	NA	NA
ukb-b-7556	Age hay fever, rhinitis or eczema diagnosed	MRC-IEU	European	Males and Females	2018	9851867	91982	NA	NA	Continuous	NA	Ben Elsworth	NA	NA	SD	NA	3761: Output from GWAS pipeline using Phesant derived variables from UKBiobank
ukb-b-4566	Sliced bread intake	MRC-IEU	European	Males and Females	2018	9851867	64949	NA	NA	Categorical Ordered	NA	Ben Elsworth	NA	NA	SD	NA	100950: Output from GWAS pipeline using Phesant derived variables from UKBiobank
prot-a-1192	Growth/differentiation factor 11	NA	European	Males and Females	2018	10534735	3301	NA	NA	Immune system	Protein	Sun BB	29875488	NA	NA	NA	NA
finn-b-KRA_PSY_MOOD	Mood disorders	NA	European	Males and Females	2021	16380466	NA	26537	192255	Binary	NA	NA	NA	NA	NA	NA	KRA_PSY_MOOD
ubm-a-1258	NET100 0102	NA	European	Males	2018	11734354	7916	NA	NA	Continuous	Psychiatric / neurological	Elliott LT	30305740	NA	NA	NA	NA
finn-b-CD2_BENIGN_SALIVARY_NOS_EXALLC	Benign neoplasm: other/unspecified salivary gland (all cancers excluded)	NA	European	Males and Females	2021	16380337	NA	368	180501	Binary	NA	NA	NA	NA	NA	NA	CD2_BENIGN_SALIVARY_NOS_EXALLC
ubm-a-1450	NET100 0294	NA	European	Males	2018	11734354	7916	NA	NA	Continuous	Psychiatric / neurological	Elliott LT	30305740	NA	NA	NA	NA
ebi-a-GCST90010329	Nectin-2 levels	NA	European	NA	2020	18197903	1313	NA	NA	NA	NA	Gilly A	33303764	NA	NA	NA	NA
prot-c-5122_92_2	Semaphorin-6A	NA	European	Males and Females	2019	501428	NA	NA	NA	Continuous	NA	Suhre K	28240269	EFO_0007937	NA	NA	name=Semaphorin-6A; chr=5; start=116443616; end=116574934; entrez=57556; uniprot=Q9H2E6
finn-b-H7_GLAUCOMA_XFG	Glaucoma, exfoliation	NA	European	Males and Females	2021	16380448	NA	1515	210201	Binary	NA	NA	NA	NA	NA	NA	H7_GLAUCOMA_XFG
ubm-a-2138	NET100 0982	NA	European	Males	2018	11734354	7916	NA	NA	Continuous	Psychiatric / neurological	Elliott LT	30305740	NA	NA	NA	NA
ebi-a-GCST90011579	OTU97_17 (Parabacteroides) prevalence	NA	European	NA	2021	5438111	8956	NA	NA	NA	NA	R<U+00FC>hlemann MC	33462482	NA	NA	NA	NA
ebi-a-GCST006698	Parental longevity (both parents in top 10%)	NA	European	NA	2017	11484376	86949	7182	79767	NA	NA	Pilling LC	29227965	NA	logOR	NA	NA
ubm-a-1084	NET25 0138	NA	European	Males	2018	11734354	7916	NA	NA	Continuous	Psychiatric / neurological	Elliott LT	30305740	NA	NA	NA	NA
prot-a-2986	Tolloid-like protein 1	NA	European	Males and Females	2018	10534735	3301	NA	NA	Immune system	Protein	Sun BB	29875488	NA	NA	NA	NA
prot-a-1287	Glutathione S-transferase Mu 1	NA	European	Males and Females	2018	10534735	3301	NA	NA	Immune system	Protein	Sun BB	29875488	NA	NA	NA	NA
prot-a-923	Eukaryotic translation initiation factor 4E type 2	NA	European	Males and Females	2018	10534735	3301	NA	NA	Immune system	Protein	Sun BB	29875488	NA	NA	NA	NA
ubm-a-3082	a2009s rh G insular short thickness	NA	European	Males	2018	11734354	8411	NA	NA	Continuous	Psychiatric / neurological	Elliott LT	30305740	NA	NA	NA	NA
met-b-154	CD337 on NK early	NA	European	Females	2015	1623350	497	NA	NA	Immune system	Immune cell-surface protein expression levels	Roederer	25772697	NA	arbitrary units	602.445	Female twins
ukb-b-16636	PCT responsible for patient data: SANDWELL PCT	MRC-IEU	European	Males and Females	2018	9851867	463010	1367	461643	Binary	NA	Ben Elsworth	NA	NA	SD	NA	41229#5PF: Output from GWAS pipeline using Phesant derived variables from UKBiobank
met-a-523	X-11485	NA	European	Males and Females	2014	2545895	4544	NA	NA	Metabolites	Unknown metabolite	Shin	24816252	NA	log10 units	0.24004	NA
prot-a-3258	Zinc fingers and homeoboxes protein 3	NA	European	Males and Females	2018	10534735	3301	NA	NA	Immune system	Protein	Sun BB	29875488	NA	NA	NA	NA
prot-a-661	Cysteine-rich secretory protein 2	NA	European	Males and Females	2018	10534735	3301	NA	NA	Immune system	Protein	Sun BB	29875488	NA	NA	NA	NA
ukb-b-7753	Yogurt intake	MRC-IEU	European	Males and Females	2018	9851867	64949	NA	NA	Categorical Ordered	NA	Ben Elsworth	NA	NA	SD	NA	102090: Output from GWAS pipeline using Phesant derived variables from UKBiobank
ebi-a-GCST90001534	CD45RA- CD4+ T cell Absolute Count	NA	European	NA	2020	15129224	3395	NA	NA	NA	NA	Orr<U+00F9> V	32929287	NA	NA	NA	NA
ukb-a-176	Treatment/medication code: atorvastatin	Neale Lab	European	Males and Females	2017	10894596	337159	10167	326992	NA	NA	Neale	NA	NA	SD	NA	NA
finn-b-I9_CARDMSEC_EXNONE	"Cardiomyopathies, Secondary/extrinsic" (no controls excluded)	NA	European	Males and Females	2021	16380466	NA	84	218708	Binary	NA	NA	NA	NA	NA	NA	I9_CARDMSEC_EXNONE
prot-c-3719_2_2	p27Kip1	NA	European	Males and Females	2019	501428	NA	NA	NA	Continuous	NA	Suhre K	28240269	EFO_0007937	NA	NA	name=Cyclin-dependent kinase inhibitor 1B; chr=12; start=12715058; end=12722371; entrez=1027; uniprot=P46527
prot-a-3235	WSC domain-containing protein 2	NA	European	Males and Females	2018	10534735	3301	NA	NA	Immune system	Protein	Sun BB	29875488	NA	NA	NA	NA
finn-b-K11_OTHILEUS	Other or unspecified ileus, impaction or obstruction	NA	European	Males and Females	2021	16380372	NA	2810	182423	Binary	NA	NA	NA	NA	NA	NA	K11_OTHILEUS
ukb-b-16713	Diagnoses - secondary ICD10: C78.7 Secondary malignant neoplasm of liver	MRC-IEU	European	Males and Females	2018	9851867	463010	1139	461871	Binary	NA	Ben Elsworth	NA	NA	SD	NA	41204#C787: Output from GWAS pipeline using Phesant derived variables from UKBiobank
prot-c-2796_62_2	Fibrinogen	NA	European	Males and Females	2019	501428	NA	NA	NA	Continuous	NA	Suhre K	28240269	EFO_0007937	NA	NA	name=Fibrinogen; chr=4; start=154562956; end=154612967; entrez=2243|2244|2266; uniprot=P02671|P02675|P02679
prot-a-1721	Leptin	NA	European	Males and Females	2018	10534735	3301	NA	NA	Immune system	Protein	Sun BB	29875488	NA	NA	NA	NA
ubm-a-2803	a2009s lh S oc middle&Lunatus area	NA	European	Males	2018	11734354	8411	NA	NA	Continuous	Psychiatric / neurological	Elliott LT	30305740	NA	NA	NA	NA
prot-c-4588_1_2	PH	NA	European	Males and Females	2019	501428	NA	NA	NA	Continuous	NA	Suhre K	28240269	EFO_0007937	NA	NA	name=Pancreatic hormone; chr=17; start=43940804; end=43942468; entrez=5539; uniprot=P01298
ubm-a-558	IDP dMRI TBSS OD Posterior corona radiata R	NA	European	Males	2018	11734354	7532	NA	NA	Continuous	Psychiatric / neurological	Elliott LT	30305740	NA	NA	NA	NA
met-b-165	CD8:%TM-like	NA	European	Females	2015	1627105	497	NA	NA	Immune system	Immune cell subset frequency	Roederer	25772697	NA	%	1.35887	Female twins
prot-a-2235	[Pyruvate dehydrogenase (acetyl-transferring)] kinase isozyme 1, mitochondrial	NA	European	Males and Females	2018	10534735	3301	NA	NA	Immune system	Protein	Sun BB	29875488	NA	NA	NA	NA
ubm-a-154	IDP T1 FAST ROIs V cerebellum VIIIa	NA	European	Males	2018	11734354	8427	NA	NA	Continuous	Psychiatric / neurological	Elliott LT	30305740	NA	NA	NA	NA
ebi-a-GCST90001942	CD25 on CD39+ secreting CD4 regulatory T cell	NA	European	NA	2020	15147117	3435	NA	NA	NA	NA	Orr<U+00F9> V	32929287	NA	NA	NA	NA
ubm-a-1764	NET100 0608	NA	European	Males	2018	11734354	7916	NA	NA	Continuous	Psychiatric / neurological	Elliott LT	30305740	NA	NA	NA	NA
met-c-853	Free cholesterol to esterified cholesterol ratio	NA	European	Males and Females	2016	11414918	13497	NA	NA	Metabolites	Lipid	Kettunen	27005778	NA	SD	NA	Est.C
ubm-a-1026	NET25 0080	NA	European	Males	2018	11734354	7916	NA	NA	Continuous	Psychiatric / neurological	Elliott LT	30305740	NA	NA	NA	NA
ukb-b-8906	Knee pain for 3+ months	MRC-IEU	European	Males and Females	2018	9851867	97889	76910	20979	Binary	NA	Ben Elsworth	NA	NA	SD	NA	3773: Output from GWAS pipeline using Phesant derived variables from UKBiobank
ukb-a-557	Diagnoses - main ICD10: K62 Other diseases of anus and rectum	Neale Lab	European	Males and Females	2017	10894596	337199	9853	327346	NA	NA	Neale	NA	NA	SD	NA	NA
finn-b-H7_KERATOCONUS	Hereditary corneal dystrophies	NA	European	Males and Females	2021	16380407	NA	336	209287	Binary	NA	NA	NA	NA	NA	NA	H7_KERATOCONUS
ubm-a-369	IDP dMRI TBSS L1 Posterior thalamic radiation L	NA	European	Males	2018	11734354	7532	NA	NA	Continuous	Psychiatric / neurological	Elliott LT	30305740	NA	NA	NA	NA
prot-a-435	CMRF35-like molecule 2	NA	European	Males and Females	2018	10534735	3301	NA	NA	Immune system	Protein	Sun BB	29875488	NA	NA	NA	NA
prot-c-3419_49_2	CAMK2D	NA	European	Males and Females	2019	501428	NA	NA	NA	Continuous	NA	Suhre K	28240269	EFO_0007937	NA	NA	name=Calcium/calmodulin-dependent protein kinase type II subunit delta; chr=4; start=113451032; end=113761927; entrez=817; uniprot=Q13557
ukb-b-20218	Operative procedures - secondary OPCS: Z50.3 Skin of finger	MRC-IEU	European	Males and Females	2018	9851867	463010	3220	459790	Binary	NA	Ben Elsworth	NA	NA	SD	NA	41210#Z503: Output from GWAS pipeline using Phesant derived variables from UKBiobank
ukb-b-10608	PCT where patients GP was registered: NOTTINGHAMSHIRE COUNTY TEACHING PCT	MRC-IEU	European	Males and Females	2018	9851867	463010	7548	455462	Binary	NA	Ben Elsworth	NA	NA	SD	NA	41230#5N8: Output from GWAS pipeline using Phesant derived variables from UKBiobank
prot-c-2700_56_2	Protein S	NA	European	Males and Females	2019	501428	NA	NA	NA	Continuous	NA	Suhre K	28240269	EFO_0007937	NA	NA	name=Vitamin K-dependent protein S; chr=3; start=93873033; end=93974066; entrez=5627; uniprot=P07225
prot-c-3341_33_4	ABL1	NA	European	Males and Females	2019	501428	NA	NA	NA	Continuous	NA	Suhre K	28240269	EFO_0007937	NA	NA	name=Tyrosine-protein kinase ABL1; chr=9; start=130713946; end=130887675; entrez=25; uniprot=P00519
prot-a-2150	Oligophrenin-1	NA	European	Males and Females	2018	10534735	3301	NA	NA	Immune system	Protein	Sun BB	29875488	NA	NA	NA	NA
ubm-a-1507	NET100 0351	NA	European	Males	2018	11734354	7916	NA	NA	Continuous	Psychiatric / neurological	Elliott LT	30305740	NA	NA	NA	NA
ukb-b-17554	Fruit consumers	MRC-IEU	European	Males and Females	2018	9851867	64949	52989	11960	Binary	NA	Ben Elsworth	NA	NA	SD	NA	104400: Output from GWAS pipeline using Phesant derived variables from UKBiobank
prot-c-3684_78_3	Macrophage scavenger receptor	NA	European	Males and Females	2019	501428	NA	NA	NA	Continuous	NA	Suhre K	28240269	EFO_0007937	NA	NA	name=Macrophage scavenger receptor types I and II; chr=8; start=16107878; end=16567490; entrez=4481; uniprot=P21757
ebi-a-GCST90002010	HLA DR on monocyte	NA	European	NA	2020	15034296	3629	NA	NA	NA	NA	Orr<U+00F9> V	32929287	NA	NA	NA	NA
finn-b-CD2_BENIGN_BONE_SCAPULA_LONG_UPPER	Benign neoplasm: Scapula and long bones of upper limb	NA	European	Males and Females	2021	16380466	NA	125	218667	Binary	NA	NA	NA	NA	NA	NA	CD2_BENIGN_BONE_SCAPULA_LONG_UPPER
ukb-b-11311	Diagnoses - secondary ICD10: F41.9 Anxiety disorder, unspecified	MRC-IEU	European	Males and Females	2018	9851867	463010	1523	461487	Binary	NA	Ben Elsworth	NA	NA	SD	NA	41204#F419: Output from GWAS pipeline using Phesant derived variables from UKBiobank
finn-b-C3_BREAST_HERNEG_EXALLC	"Malignant neoplasm of breast, HER-negative" (all cancers excluded)	NA	European	Males and Females	2021	16379027	NA	3092	99267	Binary	NA	NA	NA	NA	NA	NA	C3_BREAST_HERNEG_EXALLC
prot-a-716	Chymotrypsin-like protease CTRL-1	NA	European	Males and Females	2018	10534735	3301	NA	NA	Immune system	Protein	Sun BB	29875488	NA	NA	NA	NA
ubm-a-2565	NET100 1409	NA	European	Males	2018	11734354	7916	NA	NA	Continuous	Psychiatric / neurological	Elliott LT	30305740	NA	NA	NA	NA
ieu-a-1091	Top 1 % survival	UK Biobank	European	Males and Females	2016	9583643	75244	NA	NA	Risk factor	Aging	Pilling	27015805	NA	log odds	NA	At least one parent in top 1% of parents attained age; Results from interim Biobank release enriched for smokers; could lead to bias through collider issues in MR
ebi-a-GCST90001693	CD28+ CD45RA- CD8+ T cell Absolute Count	NA	European	NA	2020	15135292	3408	NA	NA	NA	NA	Orr<U+00F9> V	32929287	NA	NA	NA	NA
finn-b-O15_LABOUR_OBSTR_OTHER	Other obstructed labour	NA	European	Males and Females	2021	16379216	NA	1158	98626	Binary	NA	NA	NA	NA	NA	NA	O15_LABOUR_OBSTR_OTHER
ubm-a-1034	NET25 0088	NA	European	Males	2018	11734354	7916	NA	NA	Continuous	Psychiatric / neurological	Elliott LT	30305740	NA	NA	NA	NA
ukb-b-4770	Diagnoses - main ICD10: K02.9 Dental caries, unspecified	MRC-IEU	European	Males and Females	2018	9851867	463010	1997	461013	Binary	NA	Ben Elsworth	NA	NA	SD	NA	41202#K029: Output from GWAS pipeline using Phesant derived variables from UKBiobank
finn-b-H8_EXTOTITIS	Otitis externa	NA	European	Males and Females	2021	16380463	NA	3076	214100	Binary	NA	NA	NA	NA	NA	NA	H8_EXTOTITIS
ebi-a-GCST90012079	NF-kappa-B essential modulator levels	NA	European	NA	2020	12939060	21758	NA	NA	NA	NA	Folkersen L	33067605	NA	NA	NA	NA
ieu-a-81	Waist-to-hip ratio	GIANT	European	Females	2015	2467779	116740	NA	NA	Risk factor	Anthropometric	Shungin D	25673412	NA	SD	0.0770398	Adjusted for BMI
finn-b-R18_OTHER_SYMPTOMS_SIGNS_INVOLVI_GENERAL_SENSA_PERCEP	Other symptoms and signs involving general sensations and perceptions	NA	European	Males and Females	2021	16380348	NA	487	196383	Binary	NA	NA	NA	NA	NA	NA	R18_OTHER_SYMPTOMS_SIGNS_INVOLVI_GENERAL_SENSA_PERCEP
prot-a-89	Alpha-amylase 1	NA	European	Males and Females	2018	10534735	3301	NA	NA	Immune system	Protein	Sun BB	29875488	NA	NA	NA	NA
prot-c-4719_58_2	Protein disulfide isomerase A3	NA	European	Males and Females	2019	501428	NA	NA	NA	Continuous	NA	Suhre K	28240269	EFO_0007937	NA	NA	name=Protein disulfide-isomerase A3; chr=15; start=43746392; end=43773279; entrez=2923; uniprot=P30101
finn-b-CD2_BENIGN_BLADDER_EXALLC	Benign neoplasm: Bladder (all cancers excluded)	NA	European	Males and Females	2021	16380337	NA	109	180709	Binary	NA	NA	NA	NA	NA	NA	CD2_BENIGN_BLADDER_EXALLC
finn-b-E4_NUTRIDEF	Other nutritional deficiencies	NA	European	Males and Females	2021	16380466	NA	9185	209607	Binary	NA	NA	NA	NA	NA	NA	E4_NUTRIDEF
prot-a-1751	Gastric triacylglycerol lipase	NA	European	Males and Females	2018	10534735	3301	NA	NA	Immune system	Protein	Sun BB	29875488	NA	NA	NA	NA
ukb-b-998	Soya dessert intake	MRC-IEU	European	Males and Females	2018	9851867	64947	NA	NA	Categorical Ordered	NA	Ben Elsworth	NA	NA	SD	NA	102170: Output from GWAS pipeline using Phesant derived variables from UKBiobank
ebi-a-GCST90002078	SSC-A on granulocyte	NA	European	NA	2020	14903727	3112	NA	NA	NA	NA	Orr<U+00F9> V	32929287	NA	NA	NA	NA
prot-c-2879_9_2	a1-Antichymotrypsin	NA	European	Males and Females	2019	501428	NA	NA	NA	Continuous	NA	Suhre K	28240269	EFO_0007937	NA	NA	name=Alpha-1-antichymotrypsin; chr=14; start=94592058; end=94624646; entrez=12; uniprot=P01011
finn-b-AB1_CMV	Cytomegaloviral disease	NA	European	Males and Females	2021	16380457	NA	270	213666	Binary	NA	NA	NA	NA	NA	NA	AB1_CMV
prot-c-3716_63_2	IFN-g R1	NA	European	Males and Females	2019	501428	NA	NA	NA	Continuous	NA	Suhre K	28240269	EFO_0007937	NA	NA	name=Interferon gamma receptor 1; chr=6; start=137197484; end=137219449; entrez=3459; uniprot=P15260
ukb-b-12945	Average evening sound level of noise pollution	MRC-IEU	European	Males and Females	2018	9851867	456380	NA	NA	Continuous	NA	Ben Elsworth	NA	NA	SD	NA	24021: Output from GWAS pipeline using Phesant derived variables from UKBiobank
ukb-b-2525	Operative procedures - secondary OPCS: Z47.2 Skin of temple	MRC-IEU	European	Males and Females	2018	9851867	463010	1485	461525	Binary	NA	Ben Elsworth	NA	NA	SD	NA	41210#Z472: Output from GWAS pipeline using Phesant derived variables from UKBiobank
prot-a-2419	26S proteasome non-ATPase regulatory subunit 7	NA	European	Males and Females	2018	10534735	3301	NA	NA	Immune system	Protein	Sun BB	29875488	NA	NA	NA	NA
prot-a-2225	Platelet-derived growth factor subunit A	NA	European	Males and Females	2018	10534735	3301	NA	NA	Immune system	Protein	Sun BB	29875488	NA	NA	NA	NA
ukb-d-22617_6115	Job SOC coding: Care assistants and home carers	NA	European	Males and Females	2018	9557574	91149	1172	89977	Binary	NA	Neale lab	NA	NA	NA	NA	NA
ubm-a-1993	NET100 0837	NA	European	Males	2018	11734354	7916	NA	NA	Continuous	Psychiatric / neurological	Elliott LT	30305740	NA	NA	NA	NA
ukb-d-30180_irnt	Lymphocyte percentage	NA	European	Males and Females	2018	13586283	349861	NA	NA	Continuous	NA	Neale lab	NA	NA	NA	NA	NA
ubm-a-2677	volume Right-Cerebellum-Cortex	NA	European	Males	2018	11734354	8411	NA	NA	Continuous	Psychiatric / neurological	Elliott LT	30305740	NA	NA	NA	NA
prot-a-927	Eukaryotic translation initiation factor 5A-1	NA	European	Males and Females	2018	10534735	3301	NA	NA	Immune system	Protein	Sun BB	29875488	NA	NA	NA	NA
finn-b-J10_ACUTEUPPERINFEC	Acute upper respiratory infections of multiple and unspecified sites	NA	European	Males and Females	2021	16380407	NA	17920	182945	Binary	NA	NA	NA	NA	NA	NA	J10_ACUTEUPPERINFEC
prot-c-3685_53_1	MFRP	NA	European	Males and Females	2019	501428	NA	NA	NA	Continuous	NA	Suhre K	28240269	EFO_0007937	NA	NA	name=Membrane frizzled-related protein; chr=11; start=119338934; end=119346673; entrez=83552; uniprot=Q9BY79
ukb-b-14516	FI1 : numeric addition test	MRC-IEU	European	Males and Females	2018	9851867	146831	NA	NA	Categorical Ordered	NA	Ben Elsworth	NA	NA	SD	NA	4935: Output from GWAS pipeline using Phesant derived variables from UKBiobank
finn-b-I9_CARDARR	Cardiac arrest	NA	European	Males and Females	2021	16379486	NA	1129	116926	Binary	NA	NA	NA	NA	NA	NA	I9_CARDARR
met-d-Total_BCAA	Total concentration of branched-chain amino acids (leucine + isoleucine + valine)	NA	European	Males and Females	2020	12321875	115047	NA	NA	Continuous	NA	Borges CM	NA	NA	NA	NA	NA
ukb-b-3114	Operative procedures - secondary OPCS: Y21.8 Other specified cytology of organ NOC	MRC-IEU	European	Males and Females	2018	9851867	463010	1361	461649	Binary	NA	Ben Elsworth	NA	NA	SD	NA	41210#Y218: Output from GWAS pipeline using Phesant derived variables from UKBiobank
ubm-a-1479	NET100 0323	NA	European	Males	2018	11734354	7916	NA	NA	Continuous	Psychiatric / neurological	Elliott LT	30305740	NA	NA	NA	NA
finn-b-HERING_BILATERAL	Inguinal hernia, bilateral	NA	European	Males and Females	2021	16380382	NA	1515	190557	Binary	NA	NA	NA	NA	NA	NA	HERING_BILATERAL
met-a-322	Inosine	NA	European	Males and Females	2014	2545601	2675	NA	NA	Metabolites	Nucleotide	Shin	24816252	NA	log10 units	0.381968	NA
ubm-a-1301	NET100 0145	NA	European	Males	2018	11734354	7916	NA	NA	Continuous	Psychiatric / neurological	Elliott LT	30305740	NA	NA	NA	NA
ukb-b-243	Intake of sugar added to coffee	MRC-IEU	European	Males and Females	2018	9851867	64949	NA	NA	Categorical Ordered	NA	Ben Elsworth	NA	NA	SD	NA	100370: Output from GWAS pipeline using Phesant derived variables from UKBiobank
finn-b-Z21_OTHER_ORTHOPA_FOLLOW__CARE	Other orthopaedic follow-up care	NA	European	Males and Females	2021	16380373	NA	931	193570	Binary	NA	NA	NA	NA	NA	NA	Z21_OTHER_ORTHOPA_FOLLOW__CARE
ukb-b-10433	Treatment/medication code: fexofenadine	MRC-IEU	European	Males and Females	2018	9851867	462933	1437	461496	Binary	NA	Ben Elsworth	NA	NA	SD	NA	20003#1141146428: Output from GWAS pipeline using Phesant derived variables from UKBiobank
ukb-d-1747_3	Hair colour (natural, before greying): Light brown	NA	European	Males and Females	2018	13586531	360270	147560	212710	Binary	NA	Neale lab	NA	NA	NA	NA	NA
ebi-a-GCST90010199	Complement component C1q receptor levels	NA	European	NA	2020	18221903	1323	NA	NA	NA	NA	Gilly A	33303764	NA	NA	NA	NA
ebi-a-GCST90011688	TestASV_15 (Bacteroides) prevalence	NA	European	NA	2021	5438111	8956	NA	NA	NA	NA	R<U+00FC>hlemann MC	33462482	NA	NA	NA	NA
prot-a-1945	Ribosome-recycling factor, mitochondrial	NA	European	Males and Females	2018	10534735	3301	NA	NA	Immune system	Protein	Sun BB	29875488	NA	NA	NA	NA
ukb-b-7879	PCT where patients GP was registered: SOUTH WEST OXFORDSHIRE PCT	MRC-IEU	European	Males and Females	2018	9851867	463010	2273	460737	Binary	NA	Ben Elsworth	NA	NA	SD	NA	41230#5DY: Output from GWAS pipeline using Phesant derived variables from UKBiobank
ubm-a-2996	a2009s lh G temporal middle thickness	NA	European	Males	2018	11734354	8411	NA	NA	Continuous	Psychiatric / neurological	Elliott LT	30305740	NA	NA	NA	NA
finn-b-E4_DM2	Type 2 diabetes	NA	European	Males and Females	2021	16380440	NA	32469	183185	Binary	NA	NA	NA	NA	NA	NA	E4_DM2
prot-a-2529	Riboflavin kinase	NA	European	Males and Females	2018	10534735	3301	NA	NA	Immune system	Protein	Sun BB	29875488	NA	NA	NA	NA
ukb-a-1	Duration of strenuous sports	Neale Lab	European	Males and Females	2017	10894596	34342	NA	NA	NA	NA	Neale	NA	NA	SD	NA	NA
ukb-a-268	Basal metabolic rate	Neale Lab	European	Males and Females	2017	10894596	331307	NA	NA	NA	NA	Neale	NA	NA	SD	NA	NA
prot-a-2783	Submaxillary gland androgen-regulated protein 3B	NA	European	Males and Females	2018	10534735	3301	NA	NA	Immune system	Protein	Sun BB	29875488	NA	NA	NA	NA
ebi-a-GCST004432	Platelet-derived growth factor BB levels	NA	European	NA	2016	9800009	8293	NA	NA	NA	NA	Ahola-Olli AV	27989323	NA	NA	NA	NA
ubm-a-730	IDP dMRI ProbtrackX L1 slf l	NA	European	Males	2018	11734354	7532	NA	NA	Continuous	Psychiatric / neurological	Elliott LT	30305740	NA	NA	NA	NA
prot-a-1574	Ubiquitin-like protein ISG15	NA	European	Males and Females	2018	10534735	3301	NA	NA	Immune system	Protein	Sun BB	29875488	NA	NA	NA	NA
ebi-a-GCST90016943	Gut microbiota abundance (family Oxalobacteraceae id.2966)	NA	European	NA	2021	5323881	14306	NA	NA	NA	NA	Kurilshikov A	33462485	NA	NA	NA	NA
ukb-a-59	Cancer code self-reported: basal cell carcinoma	Neale Lab	European	Males and Females	2017	10894596	337159	3156	334003	NA	NA	Neale	NA	NA	SD	NA	NA
finn-b-H7_RETINOPATHYDIAB_NAS	Other diabetic retinopathy	NA	European	Males and Females	2021	16380403	NA	988	203018	Binary	NA	NA	NA	NA	NA	NA	H7_RETINOPATHYDIAB_NAS
prot-c-2734_49_4	NKp44	NA	European	Males and Females	2019	501428	NA	NA	NA	Continuous	NA	Suhre K	28240269	EFO_0007937	NA	NA	name=Natural cytotoxicity triggering receptor 2; chr=6; start=41335655; end=41350887; entrez=9436; uniprot=O95944
ukb-b-12510	Diagnoses - main ICD10: R69 Unknown and unspecified causes of morbidity	MRC-IEU	European	Males and Females	2018	9851867	463010	9411	453599	Binary	NA	Ben Elsworth	NA	NA	SD	NA	41202#R69: Output from GWAS pipeline using Phesant derived variables from UKBiobank
ukb-b-14182	Plum intake	MRC-IEU	European	Males and Females	2018	9851867	64949	NA	NA	Categorical Ordered	NA	Ben Elsworth	NA	NA	SD	NA	104580: Output from GWAS pipeline using Phesant derived variables from UKBiobank
finn-b-E4_AMYLNAS	Amyloidosis, other/unspecified	NA	European	Males and Females	2021	16380377	NA	180	197259	Binary	NA	NA	NA	NA	NA	NA	E4_AMYLNAS
prot-a-1611	Potassium voltage-gated channel subfamily E member 3	NA	European	Males and Females	2018	10534735	3301	NA	NA	Immune system	Protein	Sun BB	29875488	NA	NA	NA	NA
prot-a-1053	E3 ubiquitin-protein ligase FANCL	NA	European	Males and Females	2018	10534735	3301	NA	NA	Immune system	Protein	Sun BB	29875488	NA	NA	NA	NA
ubm-a-1288	NET100 0132	NA	European	Males	2018	11734354	7916	NA	NA	Continuous	Psychiatric / neurological	Elliott LT	30305740	NA	NA	NA	NA
finn-b-Z21_PROBL_RELATED_HOUSI_ECONO_CIRCUMSTANC	Problems related to housing and economic circumstances	NA	European	Males and Females	2021	16380462	NA	201	213655	Binary	NA	NA	NA	NA	NA	NA	Z21_PROBL_RELATED_HOUSI_ECONO_CIRCUMSTANC
prot-a-1893	Alpha-1,6-mannosyl-glycoprotein 2-beta-N-acetylglucosaminyltransferase	NA	European	Males and Females	2018	10534735	3301	NA	NA	Immune system	Protein	Sun BB	29875488	NA	NA	NA	NA
finn-b-F5_SCHZPHR	Schizophrenia	NA	European	Males and Females	2021	16380456	NA	5562	208674	Binary	NA	NA	NA	NA	NA	NA	F5_SCHZPHR
prot-a-3046	Tumor necrosis factor receptor superfamily member 1A	NA	European	Males and Females	2018	10534735	3301	NA	NA	Immune system	Protein	Sun BB	29875488	NA	NA	NA	NA
ukb-d-M13_SPINSTENOSIS	Spinal stenosis	NA	European	Males and Females	2018	10372237	361194	1910	359284	Binary	NA	Neale lab	NA	NA	NA	NA	NA
prot-a-2030	Protein kinase C-binding protein NELL1	NA	European	Males and Females	2018	10534735	3301	NA	NA	Immune system	Protein	Sun BB	29875488	NA	NA	NA	NA
prot-a-865	Dorsal root ganglia homeobox protein	NA	European	Males and Females	2018	10534735	3301	NA	NA	Immune system	Protein	Sun BB	29875488	NA	NA	NA	NA
ubm-a-1770	NET100 0614	NA	European	Males	2018	11734354	7916	NA	NA	Continuous	Psychiatric / neurological	Elliott LT	30305740	NA	NA	NA	NA
ukb-a-84	Non-cancer illness code self-reported: bone disorder	Neale Lab	European	Males and Females	2017	10894596	337159	762	336397	NA	NA	Neale	NA	NA	SD	NA	NA
met-a-609	X-12441--12-hydroxyeicosatetraenoate (12-HETE)	NA	European	Males and Females	2014	2545695	2761	NA	NA	Metabolites	Lipid	Shin	24816252	NA	log10 units	0.389115	NA
ukb-b-1567	Operative procedures - secondary OPCS: Z94.3 Left sided operation	MRC-IEU	European	Males and Females	2018	9851867	463010	92569	370441	Binary	NA	Ben Elsworth	NA	NA	SD	NA	41210#Z943: Output from GWAS pipeline using Phesant derived variables from UKBiobank
ukb-b-298	Frequency of stair climbing in last 4 weeks	MRC-IEU	European	Males and Females	2018	9851867	458309	NA	NA	Categorical Ordered	NA	Ben Elsworth	NA	NA	SD	NA	943: Output from GWAS pipeline using Phesant derived variables from UKBiobank
prot-a-1510	Interleukin-22 receptor subunit alpha-2	NA	European	Males and Females	2018	10534735	3301	NA	NA	Immune system	Protein	Sun BB	29875488	NA	NA	NA	NA
ebi-a-GCST90001868	CD3 on CD4 regulatory T cell	NA	European	NA	2020	4729351	2919	NA	NA	NA	NA	Orr<U+00F9> V	32929287	NA	NA	NA	NA
ukb-b-17848	Heel quantitative ultrasound index (QUI), manual entry	MRC-IEU	European	Males and Females	2018	9851867	40613	NA	NA	Continuous	NA	Ben Elsworth	NA	NA	SD	NA	3083: Output from GWAS pipeline using Phesant derived variables from UKBiobank
finn-b-C3_DIGESTIVE_ORGANS	Malignant neoplasm of digestive organs	NA	European	Males and Females	2021	16380466	NA	5253	213539	Binary	NA	NA	NA	NA	NA	NA	C3_DIGESTIVE_ORGANS
prot-c-4673_13_2	IL-6	NA	European	Males and Females	2019	501428	NA	NA	NA	Continuous	NA	Suhre K	28240269	EFO_0007937	NA	NA	name=Interleukin-6; chr=7; start=22725884; end=22732002; entrez=3569; uniprot=P05231
prot-a-418	CD109 antigen	NA	European	Males and Females	2018	10534735	3301	NA	NA	Immune system	Protein	Sun BB	29875488	NA	NA	NA	NA
prot-a-541	Chitinase-3-like protein 2	NA	European	Males and Females	2018	10534735	3301	NA	NA	Immune system	Protein	Sun BB	29875488	NA	NA	NA	NA
ukb-a-207	Illnesses of father: High blood pressure	Neale Lab	European	Males and Females	2017	10894596	292053	66341	228609	NA	NA	Neale	NA	NA	SD	NA	NA
ebi-a-GCST90001422	CD20- CD38- B cell %B cell	NA	European	NA	2020	15048978	3659	NA	NA	NA	NA	Orr<U+00F9> V	32929287	NA	NA	NA	NA
finn-b-ANOSMIA	Anosmia	NA	European	Males and Females	2021	16374196	NA	379	59827	Binary	NA	NA	NA	NA	NA	NA	ANOSMIA
ubm-a-215	IDP dMRI TBSS FA Posterior limb of internal capsule L	NA	European	Males	2018	11734354	7532	NA	NA	Continuous	Psychiatric / neurological	Elliott LT	30305740	NA	NA	NA	NA
prot-a-2674	Semaphorin-4C	NA	European	Males and Females	2018	10534735	3301	NA	NA	Immune system	Protein	Sun BB	29875488	NA	NA	NA	NA
ebi-a-GCST90012075	Fatty acid-binding protein, adipocyte levels	NA	European	NA	2020	13138563	21758	NA	NA	NA	NA	Folkersen L	33067605	NA	NA	NA	NA
ubm-a-1123	NET25 0177	NA	European	Males	2018	11734354	7916	NA	NA	Continuous	Psychiatric / neurological	Elliott LT	30305740	NA	NA	NA	NA
ieu-a-1189	Obsessive Compulsive Disorder	PGC	European	Males and Females	2017	8409517	33925	26888	7037	Disease	Psychiatric / neurological	NA	0	NA	\\N	NA	NA
prot-c-2638_12_2	M-CSF R	NA	European	Males and Females	2019	501428	NA	NA	NA	Continuous	NA	Suhre K	28240269	EFO_0007937	NA	NA	name=Macrophage colony-stimulating factor 1 receptor; chr=5; start=150053291; end=150113372; entrez=1436; uniprot=P07333
finn-b-F5_OTHRET	Other and unspecified mental retardation	NA	European	Males and Females	2021	16380466	NA	235	218031	Binary	NA	NA	NA	NA	NA	NA	F5_OTHRET
finn-b-KRA_PSY_DEVWIDE_EXMORE	Wide developmental disorders (more controls excluded)	NA	European	Males and Females	2021	16380158	NA	404	166584	Binary	NA	NA	NA	NA	NA	NA	KRA_PSY_DEVWIDE_EXMORE
ebi-a-GCST90012015	Tumor necrosis factor receptor 1 levels	NA	European	NA	2020	13138129	21758	NA	NA	NA	NA	Folkersen L	33067605	NA	NA	NA	NA
ukb-b-2146	Operative procedures - main OPCS: Q18.1 Diagnostic endoscopic examination of uterus and biopsy of lesion of uterus	MRC-IEU	European	Males and Females	2018	9851867	463010	5719	457291	Binary	NA	Ben Elsworth	NA	NA	SD	NA	41200#Q181: Output from GWAS pipeline using Phesant derived variables from UKBiobank
ubm-a-2089	NET100 0933	NA	European	Males	2018	11734354	7916	NA	NA	Continuous	Psychiatric / neurological	Elliott LT	30305740	NA	NA	NA	NA
prot-c-3314_74_2	GFRa-1	NA	European	Males and Females	2019	501428	NA	NA	NA	Continuous	NA	Suhre K	28240269	EFO_0007937	NA	NA	name=GDNF family receptor alpha-1; chr=10; start=116056925; end=116273467; entrez=2674; uniprot=P56159
ebi-a-GCST90013453	Lack of behavioral control	NA	European	NA	2021	7343635	3268	NA	NA	NA	NA	Heilbronner U	33590662	NA	NA	NA	NA
ukb-b-11531	Diagnoses - main ICD10: R32 Unspecified urinary incontinence	MRC-IEU	European	Males and Females	2018	9851867	463010	1011	461999	Binary	NA	Ben Elsworth	NA	NA	SD	NA	41202#R32: Output from GWAS pipeline using Phesant derived variables from UKBiobank
finn-b-H8_SUP_ACUTE	Acute suppurative otitis media	NA	European	Males and Females	2021	16380429	NA	5232	205939	Binary	NA	NA	NA	NA	NA	NA	H8_SUP_ACUTE
prot-a-42	Pituitary adenylate cyclase-activating polypeptide	NA	European	Males and Females	2018	10534735	3301	NA	NA	Immune system	Protein	Sun BB	29875488	NA	NA	NA	NA
ubm-a-982	NET25 0036	NA	European	Males	2018	11734354	7916	NA	NA	Continuous	Psychiatric / neurological	Elliott LT	30305740	NA	NA	NA	NA
finn-b-E4_GOITREDIFF	Nontoxic diffuse goitre	NA	European	Males and Females	2021	16380360	NA	482	187684	Binary	NA	NA	NA	NA	NA	NA	E4_GOITREDIFF
ukb-b-3035	Operative procedures - main OPCS: E36.9 Unspecified diagnostic endoscopic examination of larynx	MRC-IEU	European	Males and Females	2018	9851867	463010	1231	461779	Binary	NA	Ben Elsworth	NA	NA	SD	NA	41200#E369: Output from GWAS pipeline using Phesant derived variables from UKBiobank
prot-a-1805	Lymphotoxin alpha2:beta1	NA	European	Males and Females	2018	10534735	3301	NA	NA	Immune system	Protein	Sun BB	29875488	NA	NA	NA	NA
ubm-a-2551	NET100 1395	NA	European	Males	2018	11734354	7916	NA	NA	Continuous	Psychiatric / neurological	Elliott LT	30305740	NA	NA	NA	NA
ebi-a-GCST90010205	Carboxypeptidase A1 levels	NA	European	NA	2020	18221903	1323	NA	NA	NA	NA	Gilly A	33303764	NA	NA	NA	NA
ieu-a-796	Urate	GUGC	European	Males	2015	2636827	4613	NA	NA	Risk factor	Other	Huffman JE	25811787	NA	SD (mg/dL)	1.33	Overweight men; effect allele frequencies are missing
ubm-a-259	IDP dMRI TBSS MD Cerebral peduncle L	NA	European	Males	2018	11734354	7532	NA	NA	Continuous	Psychiatric / neurological	Elliott LT	30305740	NA	NA	NA	NA
ubm-a-2215	NET100 1059	NA	European	Males	2018	11734354	7916	NA	NA	Continuous	Psychiatric / neurological	Elliott LT	30305740	NA	NA	NA	NA
ukb-b-2035	Scotch pancake intake	MRC-IEU	European	Males and Females	2018	9851867	64949	NA	NA	Categorical Ordered	NA	Ben Elsworth	NA	NA	SD	NA	102020: Output from GWAS pipeline using Phesant derived variables from UKBiobank
ukb-b-4323	Attempted fluid intelligence (FI) test.	MRC-IEU	European	Males and Females	2018	9851867	151059	2008	149051	Binary	NA	Ben Elsworth	NA	NA	SD	NA	4924: Output from GWAS pipeline using Phesant derived variables from UKBiobank
prot-a-604	Ciliary neurotrophic factor	NA	European	Males and Females	2018	10534735	3301	NA	NA	Immune system	Protein	Sun BB	29875488	NA	NA	NA	NA
prot-a-1484	Interleukin-17D	NA	European	Males and Females	2018	10534735	3301	NA	NA	Immune system	Protein	Sun BB	29875488	NA	NA	NA	NA
ukb-b-10911	Diagnoses - secondary ICD10: Z92.2 Personal history of long-term (current) use of other medicaments	MRC-IEU	European	Males and Females	2018	9851867	463010	7915	455095	Binary	NA	Ben Elsworth	NA	NA	SD	NA	41204#Z922: Output from GWAS pipeline using Phesant derived variables from UKBiobank
ubm-a-2703	volume SubCortGrayVol	NA	European	Males	2018	11734354	8411	NA	NA	Continuous	Psychiatric / neurological	Elliott LT	30305740	NA	NA	NA	NA
ebi-a-GCST90002006	CD64 on monocyte	NA	European	NA	2020	15031257	3622	NA	NA	NA	NA	Orr<U+00F9> V	32929287	NA	NA	NA	NA
ebi-a-GCST90011306	C_Erysipelotrichia abundance	NA	European	NA	2021	5440786	8956	NA	NA	NA	NA	R<U+00FC>hlemann MC	33462482	NA	NA	NA	NA
ebi-a-GCST005845	Heart rate increase in response to exercise	NA	European	NA	2018	14615800	54137	NA	NA	NA	NA	Verweij N	29497042	NA	NA	NA	NA
ebi-a-GCST90017062	Gut microbiota abundance (genus Ruminococcus1 id.11373)	NA	European	NA	2021	5653204	14306	NA	NA	NA	NA	Kurilshikov A	33462485	NA	NA	NA	NA
ukb-a-22	Number of self-reported non-cancer illnesses	Neale Lab	European	Males and Females	2017	10894596	337159	NA	NA	NA	NA	Neale	NA	NA	SD	NA	NA
ieu-b-4906	Anti-Herpes simplex virus 1 IgG levels	NA	European	Males and Females	2021	7002835	683	NA	NA	NA	NA	Chong A	NA	NA	NA	NA	ALSPAC clinic - Focus@7
ebi-a-GCST90001618	HLA DR+ T cell Absolute Count	NA	European	NA	2020	15158016	3580	NA	NA	NA	NA	Orr<U+00F9> V	32929287	NA	NA	NA	NA
met-d-Total_PL	Total phospholipids in lipoprotein particles	NA	European	Males and Females	2020	12321875	115078	NA	NA	Continuous	NA	Borges CM	NA	NA	NA	NA	NA
prot-a-562	CDGSH iron-sulfur domain-containing protein 1	NA	European	Males and Females	2018	10534735	3301	NA	NA	Immune system	Protein	Sun BB	29875488	NA	NA	NA	NA
ubm-a-1862	NET100 0706	NA	European	Males	2018	11734354	7916	NA	NA	Continuous	Psychiatric / neurological	Elliott LT	30305740	NA	NA	NA	NA
ebi-a-GCST90001998	PDL-1 on CD14+ CD16+ monocyte	NA	European	NA	2020	15030660	3618	NA	NA	NA	NA	Orr<U+00F9> V	32929287	NA	NA	NA	NA
ebi-a-GCST005038	Allergic disease (asthma, hay fever or eczema)	NA	European	NA	2017	8133670	360838	180129	180709	NA	NA	Ferreira MA	29083406	NA	logOR	NA	NA
prot-a-1260	Probable G-protein coupled receptor 101	NA	European	Males and Females	2018	10534735	3301	NA	NA	Immune system	Protein	Sun BB	29875488	NA	NA	NA	NA
ubm-a-858	IDP dMRI ProbtrackX ISOVF ilf l	NA	European	Males	2018	11734354	7532	NA	NA	Continuous	Psychiatric / neurological	Elliott LT	30305740	NA	NA	NA	NA
ubm-a-302	IDP dMRI TBSS MO Inferior cerebellar peduncle R	NA	European	Males	2018	11734354	7532	NA	NA	Continuous	Psychiatric / neurological	Elliott LT	30305740	NA	NA	NA	NA
ukb-a-464	Vitamin and mineral supplements: Multivitamins +/- minerals	Neale Lab	European	Males and Females	2017	10894596	335591	71695	263896	NA	NA	Neale	NA	NA	SD	NA	NA
ebi-a-GCST90011400	OTU97_5 (Sutterella) abundance	NA	European	NA	2021	5386902	8956	NA	NA	NA	NA	R<U+00FC>hlemann MC	33462482	NA	NA	NA	NA
ubm-a-487	IDP dMRI TBSS ICVF Body of corpus callosum	NA	European	Males	2018	11734354	7532	NA	NA	Continuous	Psychiatric / neurological	Elliott LT	30305740	NA	NA	NA	NA
ebi-a-GCST90010351	Trefoil factor 2 levels	NA	European	NA	2020	18197903	1313	NA	NA	NA	NA	Gilly A	33303764	NA	NA	NA	NA
ubm-a-2957	DKTatlas lh insula thickness	NA	European	Males	2018	11734354	8411	NA	NA	Continuous	Psychiatric / neurological	Elliott LT	30305740	NA	NA	NA	NA
prot-a-1137	Forkhead box protein J2	NA	European	Males and Females	2018	10534735	3301	NA	NA	Immune system	Protein	Sun BB	29875488	NA	NA	NA	NA
prot-a-3032	Tumor necrosis factor receptor superfamily member 10A	NA	European	Males and Females	2018	10534735	3301	NA	NA	Immune system	Protein	Sun BB	29875488	NA	NA	NA	NA
finn-b-ALLERGIC_CONTACT_DERMA_DRUGS_CONTACT_W_SKIN	Allergic contact dermatitis due to drugs in contact with skin	NA	European	Males and Females	2021	16380466	NA	296	218496	Binary	NA	NA	NA	NA	NA	NA	ALLERGIC_CONTACT_DERMA_DRUGS_CONTACT_W_SKIN
prot-c-2421_7_3	BDNF	NA	European	Males and Females	2019	501428	NA	NA	NA	Continuous	NA	Suhre K	28240269	EFO_0007937	NA	NA	name=Brain-derived neurotrophic factor; chr=11; start=27654893; end=27722058; entrez=627; uniprot=P23560
ukb-d-ILD_DIFF_DG	ILD differential diagnosis	NA	European	Males and Females	2018	13586589	361194	26710	334484	Binary	NA	Neale lab	NA	NA	NA	NA	NA
ubm-a-3108	a2009s rh S calcarine thickness	NA	European	Males	2018	11734354	8411	NA	NA	Continuous	Psychiatric / neurological	Elliott LT	30305740	NA	NA	NA	NA
ukb-d-20450	Feelings of worthlessness during worst period of depression	NA	European	Males and Females	2018	13559197	62128	31593	30535	Binary	NA	Neale lab	NA	NA	NA	NA	NA
ubm-a-3134	a2009s rh S suborbital thickness	NA	European	Males	2018	11734354	8411	NA	NA	Continuous	Psychiatric / neurological	Elliott LT	30305740	NA	NA	NA	NA
finn-b-J10_VOCALLARYNX	Diseases of vocal cords and larynx+other diseases of upper respiratory tract, no elsewhere classified	NA	European	Males and Females	2021	16380297	NA	10142	167849	Binary	NA	NA	NA	NA	NA	NA	J10_VOCALLARYNX
ebi-a-GCST90001663	CD28- CD8dim T cell Absolute Count	NA	European	NA	2020	15135292	3408	NA	NA	NA	NA	Orr<U+00F9> V	32929287	NA	NA	NA	NA
finn-b-ST19_FAILU_REJEC_TRANSPLANTED_ORGANS_TISSU	Failure and rejection of transplanted organs and tissues	NA	European	Males and Females	2021	16380395	NA	124	199271	Binary	NA	NA	NA	NA	NA	NA	ST19_FAILU_REJEC_TRANSPLANTED_ORGANS_TISSU
ubm-a-1817	NET100 0661	NA	European	Males	2018	11734354	7916	NA	NA	Continuous	Psychiatric / neurological	Elliott LT	30305740	NA	NA	NA	NA
prot-a-2587	60S acidic ribosomal protein P2	NA	European	Males and Females	2018	10534735	3301	NA	NA	Immune system	Protein	Sun BB	29875488	NA	NA	NA	NA
met-a-490	X-11261	NA	European	Males and Females	2014	2545582	7771	NA	NA	Metabolites	Unknown metabolite	Shin	24816252	NA	log10 units	0.246954	NA
finn-b-L12_PAPULOSQUAMOUS	Papulosquamous disorders	NA	European	Males and Females	2021	16380466	NA	6550	212242	Binary	NA	NA	NA	NA	NA	NA	L12_PAPULOSQUAMOUS
ubm-a-1306	NET100 0150	NA	European	Males	2018	11734354	7916	NA	NA	Continuous	Psychiatric / neurological	Elliott LT	30305740	NA	NA	NA	NA
ebi-a-GCST90012034	Resistin levels	NA	European	NA	2020	13138697	21758	NA	NA	NA	NA	Folkersen L	33067605	NA	NA	NA	NA
ubm-a-2897	a2009s rh S central area	NA	European	Males	2018	11734354	8411	NA	NA	Continuous	Psychiatric / neurological	Elliott LT	30305740	NA	NA	NA	NA
finn-b-K11_PARALIL	Paralytic ileus	NA	European	Males and Females	2021	16380364	NA	517	182423	Binary	NA	NA	NA	NA	NA	NA	K11_PARALIL
prot-c-3061_61_2	Cathepsin B	NA	European	Males and Females	2019	501428	NA	NA	NA	Continuous	NA	Suhre K	28240269	EFO_0007937	NA	NA	name=Cathepsin B; chr=8; start=11842524; end=11869448; entrez=1508; uniprot=P07858
ukb-b-4955	Dairy smoothie intake	MRC-IEU	European	Males and Females	2018	9851867	64941	NA	NA	Categorical Ordered	NA	Ben Elsworth	NA	NA	SD	NA	100230: Output from GWAS pipeline using Phesant derived variables from UKBiobank
ebi-a-GCST90001908	CCR7 on naive CD8+ T cell	NA	European	NA	2020	14842727	2910	NA	NA	NA	NA	Orr<U+00F9> V	32929287	NA	NA	NA	NA
ubm-a-784	IDP dMRI ProbtrackX L3 slf l	NA	European	Males	2018	11734354	7532	NA	NA	Continuous	Psychiatric / neurological	Elliott LT	30305740	NA	NA	NA	NA
finn-b-K11_HYPO_ONLY	Tooth agenesis EXCLUDE clefts and syndromes	NA	European	Males and Females	2021	16380466	NA	246	218546	Binary	NA	NA	NA	NA	NA	NA	K11_HYPO_ONLY
prot-a-1627	UPF0258 protein KIAA1024	NA	European	Males and Females	2018	10534735	3301	NA	NA	Immune system	Protein	Sun BB	29875488	NA	NA	NA	NA
prot-a-2281	Polycystin-2	NA	European	Males and Females	2018	10534735	3301	NA	NA	Immune system	Protein	Sun BB	29875488	NA	NA	NA	NA
ubm-a-2724	DKTatlas lh lateralorbitofrontal area	NA	European	Males	2018	11734354	8411	NA	NA	Continuous	Psychiatric / neurological	Elliott LT	30305740	NA	NA	NA	NA
finn-b-F5_SCHIZPER	Schizoid personality disorder	NA	European	Males and Females	2021	16380429	NA	424	212179	Binary	NA	NA	NA	NA	NA	NA	F5_SCHIZPER
ukb-d-M70	Diagnoses - main ICD10: M70 Soft tissue disorders related to use, overuse and pressure	NA	European	Males and Females	2018	9498351	361194	1079	360115	Binary	NA	Neale lab	NA	NA	NA	NA	NA
ubm-a-1596	NET100 0440	NA	European	Males	2018	11734354	7916	NA	NA	Continuous	Psychiatric / neurological	Elliott LT	30305740	NA	NA	NA	NA
ukb-b-7859	Impedance of arm (right)	MRC-IEU	European	Males and Females	2018	9851867	454826	NA	NA	Continuous	NA	Ben Elsworth	NA	NA	SD	NA	23109: Output from GWAS pipeline using Phesant derived variables from UKBiobank
prot-c-3394_81_2	PLK-1	NA	European	Males and Females	2019	501428	NA	NA	NA	Continuous	NA	Suhre K	28240269	EFO_0007937	NA	NA	name=Serine/threonine-protein kinase PLK1; chr=16; start=23677656; end=23690367; entrez=5347; uniprot=P53350
finn-b-AB1_BACT_BIR_OTHER_INF_AGENTS	Bacterial, viral and other infectious agents	NA	European	Males and Females	2021	16380466	NA	1427	217365	Binary	NA	NA	NA	NA	NA	NA	AB1_BACT_BIR_OTHER_INF_AGENTS
ebi-a-GCST90020091	Estradiol levels	NA	European	NA	2021	7489424	147690	13367	134323	NA	NA	Schmitz D	34255042	NA	NA	NA	NA
ukb-b-1070	Average weekly fortified wine intake	MRC-IEU	European	Males and Females	2018	9851867	327563	NA	NA	Categorical Ordered	NA	Ben Elsworth	NA	NA	SD	NA	1608: Output from GWAS pipeline using Phesant derived variables from UKBiobank
ebi-a-GCST90000479	Interleukin-7 levels	NA	European	NA	2020	7883872	982	NA	NA	NA	NA	Hillary RF	32641083	NA	NA	NA	NA
prot-a-918	Translation initiation factor eIF-2B subunit alpha	NA	European	Males and Females	2018	10534735	3301	NA	NA	Immune system	Protein	Sun BB	29875488	NA	NA	NA	NA
ebi-a-GCST90001975	FSC-A on HLA DR+ T cell	NA	European	NA	2020	14891166	3060	NA	NA	NA	NA	Orr<U+00F9> V	32929287	NA	NA	NA	NA
prot-a-427	B-cell receptor CD22	NA	European	Males and Females	2018	10534735	3301	NA	NA	Immune system	Protein	Sun BB	29875488	NA	NA	NA	NA
finn-b-L12_DERM_NUMMULAR	Nummular dermatitis	NA	European	Males and Females	2021	16380428	NA	1056	198740	Binary	NA	NA	NA	NA	NA	NA	L12_DERM_NUMMULAR
prot-c-2443_10_4	FGF-8B	NA	European	Males and Females	2019	501428	NA	NA	NA	Continuous	NA	Suhre K	28240269	EFO_0007937	NA	NA	name=Fibroblast growth factor 8 isoform B; chr=10; start=101770130; end=101780369; entrez=2253; uniprot=P55075
ubm-a-1881	NET100 0725	NA	European	Males	2018	11734354	7916	NA	NA	Continuous	Psychiatric / neurological	Elliott LT	30305740	NA	NA	NA	NA
ukb-d-20477	Ever talked to a health professional about unusual or psychotic experiences	NA	European	Males and Females	2018	9630473	5788	1225	4563	Binary	NA	Neale lab	NA	NA	NA	NA	NA
finn-b-N14_OTHINFVAGVULV	Other inflammation of vagina/vulva	NA	European	Males and Females	2021	16379504	NA	513	111858	Binary	NA	NA	NA	NA	NA	NA	N14_OTHINFVAGVULV
ebi-a-GCST90017063	Gut microbiota abundance (genus Ruminococcus2 id.11374)	NA	European	NA	2021	5619774	14306	NA	NA	NA	NA	Kurilshikov A	33462485	NA	NA	NA	NA
prot-c-3879_50_1	CDC37	NA	European	Males and Females	2019	501428	NA	NA	NA	Continuous	NA	Suhre K	28240269	EFO_0007937	NA	NA	name=Hsp90 co-chaperone Cdc37; chr=19; start=10391134; end=10420121; entrez=11140; uniprot=Q16543
prot-a-2422	Proteasome assembly chaperone 3	NA	European	Males and Females	2018	10534735	3301	NA	NA	Immune system	Protein	Sun BB	29875488	NA	NA	NA	NA
ubm-a-1072	NET25 0126	NA	European	Males	2018	11734354	7916	NA	NA	Continuous	Psychiatric / neurological	Elliott LT	30305740	NA	NA	NA	NA
ukb-d-I9_CORATHER	Coronary atherosclerosis	NA	European	Males and Females	2018	13586589	361194	14334	346860	Binary	NA	Neale lab	NA	NA	NA	NA	NA
ukb-b-5379	Frequency of friend/family visits	MRC-IEU	European	Males and Females	2018	9851867	459830	NA	NA	Categorical Ordered	NA	Ben Elsworth	NA	NA	SD	NA	1031: Output from GWAS pipeline using Phesant derived variables from UKBiobank
finn-b-F5_MILDRET	Mild mental retardation	NA	European	Males and Females	2021	16380466	NA	486	218031	Binary	NA	NA	NA	NA	NA	NA	F5_MILDRET
ubm-a-1607	NET100 0451	NA	European	Males	2018	11734354	7916	NA	NA	Continuous	Psychiatric / neurological	Elliott LT	30305740	NA	NA	NA	NA
ebi-a-GCST90014122	Lacunar stroke	NA	European	NA	2021	6909434	225419	6030	248929	NA	NA	Traylor M	33773637	NA	NA	NA	NA
prot-a-1348	Porphobilinogen deaminase	NA	European	Males and Females	2018	10534735	3301	NA	NA	Immune system	Protein	Sun BB	29875488	NA	NA	NA	NA
ubm-a-560	IDP dMRI TBSS OD Posterior thalamic radiation R	NA	European	Males	2018	11734354	7532	NA	NA	Continuous	Psychiatric / neurological	Elliott LT	30305740	NA	NA	NA	NA
ebi-a-GCST90001857	CD3 on activated & secreting CD4 regulatory T cell	NA	European	NA	2020	14849624	2919	NA	NA	NA	NA	Orr<U+00F9> V	32929287	NA	NA	NA	NA
ukb-b-970	Diagnoses - secondary ICD10: E11.9 Without complications	MRC-IEU	European	Males and Females	2018	9851867	463010	12045	450965	Binary	NA	Ben Elsworth	NA	NA	SD	NA	41204#E119: Output from GWAS pipeline using Phesant derived variables from UKBiobank
prot-a-2088	Glucocorticoid receptor	NA	European	Males and Females	2018	10534735	3301	NA	NA	Immune system	Protein	Sun BB	29875488	NA	NA	NA	NA
finn-b-G6_ROOTPLEXOTHUNS	Other and unspecified nerve root and plexus disorders, also in other diseases	NA	European	Males and Females	2021	16380420	NA	2428	195047	Binary	NA	NA	NA	NA	NA	NA	G6_ROOTPLEXOTHUNS
ubm-a-736	IDP dMRI ProbtrackX L2 ar l	NA	European	Males	2018	11734354	7532	NA	NA	Continuous	Psychiatric / neurological	Elliott LT	30305740	NA	NA	NA	NA
ebi-a-GCST90000486	Monocyte chemoattractant protein-4 levels	NA	European	NA	2020	7883880	982	NA	NA	NA	NA	Hillary RF	32641083	NA	NA	NA	NA
ebi-a-GCST90000505	Urokinase-type plasminogen activator levels	NA	European	NA	2020	7883863	982	NA	NA	NA	NA	Hillary RF	32641083	NA	NA	NA	NA
met-a-408	X-05907	NA	European	Males and Females	2014	2545753	7734	NA	NA	Metabolites	Unknown metabolite	Shin	24816252	NA	log10 units	0.129963	NA
prot-c-4993_16_1	GSTA3	NA	European	Males and Females	2019	501428	NA	NA	NA	Continuous	NA	Suhre K	28240269	EFO_0007937	NA	NA	name=Glutathione S-transferase A3; chr=6; start=52847910; end=52909685; entrez=2940; uniprot=Q16772
prot-c-3374_49_2	HCK	NA	European	Males and Females	2019	501428	NA	NA	NA	Continuous	NA	Suhre K	28240269	EFO_0007937	NA	NA	name=Tyrosine-protein kinase HCK; chr=20; start=32052188; end=32101856; entrez=3055; uniprot=P08631
ubm-a-2484	NET100 1328	NA	European	Males	2018	11734354	7916	NA	NA	Continuous	Psychiatric / neurological	Elliott LT	30305740	NA	NA	NA	NA
prot-a-2485	DNA repair protein RAD51 homolog 1	NA	European	Males and Females	2018	10534735	3301	NA	NA	Immune system	Protein	Sun BB	29875488	NA	NA	NA	NA
ukb-b-11650	Corneal hysteresis (left)	MRC-IEU	European	Males and Females	2018	9851867	97465	NA	NA	Continuous	NA	Ben Elsworth	NA	NA	SD	NA	5264: Output from GWAS pipeline using Phesant derived variables from UKBiobank
ubm-a-2999	a2009s lh Lat Fis-post thickness	NA	European	Males	2018	11734354	8411	NA	NA	Continuous	Psychiatric / neurological	Elliott LT	30305740	NA	NA	NA	NA
prot-a-1648	Killer cell immunoglobulin-like receptor 3DS1	NA	European	Males and Females	2018	10534735	3301	NA	NA	Immune system	Protein	Sun BB	29875488	NA	NA	NA	NA
prot-a-2983	Tight junction protein ZO-1	NA	European	Males and Females	2018	10534735	3301	NA	NA	Immune system	Protein	Sun BB	29875488	NA	NA	NA	NA
ukb-b-8124	Onion intake	MRC-IEU	European	Males and Females	2018	9851867	64949	NA	NA	Categorical Ordered	NA	Ben Elsworth	NA	NA	SD	NA	104260: Output from GWAS pipeline using Phesant derived variables from UKBiobank
ubm-a-917	NODEamps100 0026	NA	European	Males	2018	11734354	7916	NA	NA	Continuous	Psychiatric / neurological	Elliott LT	30305740	NA	NA	NA	NA
ubm-a-2480	NET100 1324	NA	European	Males	2018	11734354	7916	NA	NA	Continuous	Psychiatric / neurological	Elliott LT	30305740	NA	NA	NA	NA
prot-a-2054	Neuroligin-4, X-linked	NA	European	Males and Females	2018	10534735	3301	NA	NA	Immune system	Protein	Sun BB	29875488	NA	NA	NA	NA
prot-a-1378	Heparan-sulfate 6-O-sulfotransferase 1	NA	European	Males and Females	2018	10534735	3301	NA	NA	Immune system	Protein	Sun BB	29875488	NA	NA	NA	NA
ukb-b-9038	Main speciality of consultant (recoded): Ophthalmology	MRC-IEU	European	Males and Females	2018	9851867	461230	22306	438924	Binary	NA	Ben Elsworth	NA	NA	SD	NA	41245#1610: Output from GWAS pipeline using Phesant derived variables from UKBiobank
ukb-b-16665	Operative procedures - main OPCS: Q10.3 Dilation of cervix uteri and curettage of uterus NEC	MRC-IEU	European	Males and Females	2018	9851867	463010	4460	458550	Binary	NA	Ben Elsworth	NA	NA	SD	NA	41200#Q103: Output from GWAS pipeline using Phesant derived variables from UKBiobank
ubm-a-2381	NET100 1225	NA	European	Males	2018	11734354	7916	NA	NA	Continuous	Psychiatric / neurological	Elliott LT	30305740	NA	NA	NA	NA
ukb-a-332	Fracture resulting from simple fall	Neale Lab	European	Males and Females	2017	10894596	31762	18864	12898	NA	NA	Neale	NA	NA	SD	NA	NA
ubm-a-946	NODEamps100 0055	NA	European	Males	2018	11734354	7916	NA	NA	Continuous	Psychiatric / neurological	Elliott LT	30305740	NA	NA	NA	NA
finn-b-E4_DMNASNOCOMP	Unspecified diabetes without complications	NA	European	Males and Females	2021	16380336	NA	1219	183185	Binary	NA	NA	NA	NA	NA	NA	E4_DMNASNOCOMP
prot-a-1717	Low-density lipoprotein receptor	NA	European	Males and Females	2018	10534735	3301	NA	NA	Immune system	Protein	Sun BB	29875488	NA	NA	NA	NA
ebi-a-GCST90016931	Gut microbiota abundance (family Clostridiaceae1 id.1869)	NA	European	NA	2021	5598586	14306	NA	NA	NA	NA	Kurilshikov A	33462485	NA	NA	NA	NA
ukb-b-14796	Non-cancer illness code, self-reported: diverticular disease/diverticulitis	MRC-IEU	European	Males and Females	2018	9851867	462933	5193	457740	Binary	NA	Ben Elsworth	NA	NA	SD	NA	20002#1458: Output from GWAS pipeline using Phesant derived variables from UKBiobank
ukb-d-I9_STR_EXH	Ischaemic Stroke, excluding all haemorrhages	NA	European	Males and Females	2018	11321390	361194	3314	357880	Binary	NA	Neale lab	NA	NA	NA	NA	NA
prot-a-2733	Signal-regulatory protein beta-1	NA	European	Males and Females	2018	10534735	3301	NA	NA	Immune system	Protein	Sun BB	29875488	NA	NA	NA	NA
ubm-a-1060	NET25 0114	NA	European	Males	2018	11734354	7916	NA	NA	Continuous	Psychiatric / neurological	Elliott LT	30305740	NA	NA	NA	NA
ubm-a-762	IDP dMRI ProbtrackX L2 unc r	NA	European	Males	2018	11734354	7532	NA	NA	Continuous	Psychiatric / neurological	Elliott LT	30305740	NA	NA	NA	NA
ubm-a-431	IDP dMRI TBSS L2 Superior fronto-occipital fasciculus L	NA	European	Males	2018	11734354	7532	NA	NA	Continuous	Psychiatric / neurological	Elliott LT	30305740	NA	NA	NA	NA
met-a-495	X-11315	NA	European	Males and Females	2014	2545567	7785	NA	NA	Metabolites	Unknown metabolite	Shin	24816252	NA	log10 units	0.166136	NA
ebi-a-GCST006678	Acute insulin response (insulin secretion and BMI adjusted)	NA	European	NA	2017	9629245	2087	NA	NA	NA	NA	Wood AR	28490609	NA	NA	NA	NA
finn-b-ULCERRECT	Ulcerative rectosigmoiditis	NA	European	Males and Females	2021	16380453	NA	1198	210300	Binary	NA	NA	NA	NA	NA	NA	ULCERRECT
prot-a-1008	Tissue Factor	NA	European	Males and Females	2018	10534735	3301	NA	NA	Immune system	Protein	Sun BB	29875488	NA	NA	NA	NA
ebi-a-GCST90016958	Gut microbiota abundance (family Victivallaceae id.2255)	NA	European	NA	2021	5184073	14306	NA	NA	NA	NA	Kurilshikov A	33462485	NA	NA	NA	NA
ebi-a-GCST90001728	CD19 on IgD+ CD38- unswitched memory B cell	NA	European	NA	2020	14184578	1833	NA	NA	NA	NA	Orr<U+00F9> V	32929287	NA	NA	NA	NA
ukb-b-3132	Operation code: eye surgery	MRC-IEU	European	Males and Females	2018	9851867	462933	4337	458596	Binary	NA	Ben Elsworth	NA	NA	SD	NA	20004#1434: Output from GWAS pipeline using Phesant derived variables from UKBiobank
ubm-a-2849	DKTatlas rh supramarginal area	NA	European	Males	2018	11734354	8411	NA	NA	Continuous	Psychiatric / neurological	Elliott LT	30305740	NA	NA	NA	NA
prot-a-2961	Transforming growth factor alpha	NA	European	Males and Females	2018	10534735	3301	NA	NA	Immune system	Protein	Sun BB	29875488	NA	NA	NA	NA
prot-c-4342_10_3	sICAM-1	NA	European	Males and Females	2019	501428	NA	NA	NA	Continuous	NA	Suhre K	28240269	EFO_0007937	NA	NA	name=Intercellular adhesion molecule 1; chr=19; start=10270835; end=10286615; entrez=3383; uniprot=P05362
prot-a-2838	Serine/arginine-rich splicing factor 6	NA	European	Males and Females	2018	10534735	3301	NA	NA	Immune system	Protein	Sun BB	29875488	NA	NA	NA	NA
finn-b-N14_RENFAILNAS	Unspesified kidney failure	NA	European	Males and Females	2021	16380451	NA	963	212841	Binary	NA	NA	NA	NA	NA	NA	N14_RENFAILNAS
ieu-a-1022	Percent emphysema	MESA	European	Males and Females	2014	2390490	2431	NA	NA	Risk factor	Lung disease	Manichaikul A	24383474	NA	log (% emphysema + 1)	0.719	NA
finn-b-N14_ENDOMETRIOSIS	Endometriosis	NA	European	Males and Females	2021	16377306	NA	8288	68969	Binary	NA	NA	NA	NA	NA	NA	N14_ENDOMETRIOSIS
ukb-b-14050	Why reduced smoking: Financial reasons	MRC-IEU	European	Males and Females	2018	9851867	14951	4012	10939	Binary	NA	Ben Elsworth	NA	NA	SD	NA	6158#4: Output from GWAS pipeline using Phesant derived variables from UKBiobank
prot-a-1592	Integral membrane protein 2C	NA	European	Males and Females	2018	10534735	3301	NA	NA	Immune system	Protein	Sun BB	29875488	NA	NA	NA	NA
ukb-b-12089	Treatment/medication code: mebeverine	MRC-IEU	European	Males and Females	2018	9851867	462933	2271	460662	Binary	NA	Ben Elsworth	NA	NA	SD	NA	20003#1140879428: Output from GWAS pipeline using Phesant derived variables from UKBiobank
finn-b-CD2_INSITU_CERVIX_UTERI_NOS_EXALLC	"Carcinoma in situ of uteri, other/unspecified" (all cancers excluded)	NA	European	Males and Females	2021	16378981	NA	109	102506	Binary	NA	NA	NA	NA	NA	NA	CD2_INSITU_CERVIX_UTERI_NOS_EXALLC
ukb-b-17962	Operative procedures - secondary OPCS: E13.3 Intranasal antrostomy	MRC-IEU	European	Males and Females	2018	9851867	463010	1246	461764	Binary	NA	Ben Elsworth	NA	NA	SD	NA	41210#E133: Output from GWAS pipeline using Phesant derived variables from UKBiobank
finn-b-C3_LIP_ORAL_PHARYNX	Malignant neoplasm of lip, oral cavity and pharynx	NA	European	Males and Females	2021	16380466	NA	126	218666	Binary	NA	NA	NA	NA	NA	NA	C3_LIP_ORAL_PHARYNX
met-c-936	Total fatty acids	NA	European	Males and Females	2016	11412092	13505	NA	NA	Metabolites	Fatty acid	Kettunen	27005778	NA	SD	NA	NA
ebi-a-GCST90012115	Age-related hearing impairment (MTAG)	NA	European	NA	2020	10858770	330759	NA	NA	NA	NA	Kalra G	32986727	NA	NA	NA	NA
ukb-b-16482	Yogurt/ice-cream consumers	MRC-IEU	European	Males and Females	2018	9851867	64949	26305	38644	Binary	NA	Ben Elsworth	NA	NA	SD	NA	102080: Output from GWAS pipeline using Phesant derived variables from UKBiobank
met-a-415	X-06350	NA	European	Males and Females	2014	2545553	5161	NA	NA	Metabolites	Unknown metabolite	Shin	24816252	NA	log10 units	0.144889	NA
ubm-a-1250	NET100 0094	NA	European	Males	2018	11734354	7916	NA	NA	Continuous	Psychiatric / neurological	Elliott LT	30305740	NA	NA	NA	NA
finn-b-L12_HIDRADENITISSUP	Hidradenitis suppurativa	NA	European	Males and Females	2021	16380451	NA	409	211139	Binary	NA	NA	NA	NA	NA	NA	L12_HIDRADENITISSUP
ubm-a-1739	NET100 0583	NA	European	Males	2018	11734354	7916	NA	NA	Continuous	Psychiatric / neurological	Elliott LT	30305740	NA	NA	NA	NA
ukb-d-C_URINARY_TRACT	Cancer of urinary tract	NA	European	Males and Females	2018	10309627	361194	1841	359353	Binary	NA	Neale lab	NA	NA	NA	NA	NA
ubm-a-615	IDP dMRI TBSS ISOVF Cingulum cingulate gyrus L	NA	European	Males	2018	11734354	7532	NA	NA	Continuous	Psychiatric / neurological	Elliott LT	30305740	NA	NA	NA	NA
prot-a-1773	Leucine-rich repeat, immunoglobulin-like domain and transmembrane domain-containing protein 3	NA	European	Males and Females	2018	10534735	3301	NA	NA	Immune system	Protein	Sun BB	29875488	NA	NA	NA	NA
prot-a-3106	t-SNARE domain-containing protein 1	NA	European	Males and Females	2018	10534735	3301	NA	NA	Immune system	Protein	Sun BB	29875488	NA	NA	NA	NA
prot-a-869	Desmoglein-1	NA	European	Males and Females	2018	10534735	3301	NA	NA	Immune system	Protein	Sun BB	29875488	NA	NA	NA	NA
prot-b-44	CD40 ligand	NA	European	Males and Females	2018	5270646	3394	NA	NA	Immune system	Protein	Folkersen L	28369058	NA	NA	NA	NA
ubm-a-523	IDP dMRI TBSS ICVF Fornix cres+Stria terminalis L	NA	European	Males	2018	11734354	7532	NA	NA	Continuous	Psychiatric / neurological	Elliott LT	30305740	NA	NA	NA	NA
ukb-a-455	Medication for pain relief constipation heartburn: Paracetamol	Neale Lab	European	Males and Females	2017	10894596	333581	72882	260699	NA	NA	Neale	NA	NA	SD	NA	NA
finn-b-TONGUEABNORMALITY	Tongue abnormality	NA	European	Males and Females	2021	16380466	NA	777	218015	Binary	NA	NA	NA	NA	NA	NA	TONGUEABNORMALITY
prot-a-236	Apoptosis regulator Bcl-2	NA	European	Males and Females	2018	10534735	3301	NA	NA	Immune system	Protein	Sun BB	29875488	NA	NA	NA	NA
ukb-d-5699	FI10 : arithmetic sequence recognition	NA	European	Males and Females	2018	13520623	20880	16721	4159	Binary	NA	Neale lab	NA	NA	NA	NA	NA
ubm-a-1539	NET100 0383	NA	European	Males	2018	11734354	7916	NA	NA	Continuous	Psychiatric / neurological	Elliott LT	30305740	NA	NA	NA	NA
ukb-b-19060	Hearing aid user	MRC-IEU	European	Males and Females	2018	9851867	280546	14048	266498	Binary	NA	Ben Elsworth	NA	NA	SD	NA	3393: Output from GWAS pipeline using Phesant derived variables from UKBiobank
ukb-b-1228	Diagnoses - secondary ICD10: I84.6 Residual haemorrhoidal skin tags	MRC-IEU	European	Males and Females	2018	9851867	463010	1710	461300	Binary	NA	Ben Elsworth	NA	NA	SD	NA	41204#I846: Output from GWAS pipeline using Phesant derived variables from UKBiobank
ukb-d-O70	Diagnoses - main ICD10: O70 Perineal laceration during delivery	NA	European	Males and Females	2018	11192727	361194	3077	358117	Binary	NA	Neale lab	NA	NA	NA	NA	NA
ebi-a-GCST90001437	Naive-mature B cell %lymphocyte	NA	European	NA	2020	15048937	3656	NA	NA	NA	NA	Orr<U+00F9> V	32929287	NA	NA	NA	NA
ukb-b-16207	Blood clot, DVT, bronchitis, emphysema, asthma, rhinitis, eczema, allergy diagnosed by doctor: Emphysema/chronic bronchitis	MRC-IEU	European	Males and Females	2018	9851867	462013	7844	454169	Binary	NA	Ben Elsworth	NA	NA	SD	NA	6152#6: Output from GWAS pipeline using Phesant derived variables from UKBiobank
prot-a-2927	Tapasin-related protein	NA	European	Males and Females	2018	10534735	3301	NA	NA	Immune system	Protein	Sun BB	29875488	NA	NA	NA	NA
prot-a-1905	Histone-lysine N-methyltransferase 2D	NA	European	Males and Females	2018	10534735	3301	NA	NA	Immune system	Protein	Sun BB	29875488	NA	NA	NA	NA
finn-b-M13_DISCINFECTION	Infection of intervertebral disc (pyogenic)	NA	European	Males and Females	2021	16380216	NA	133	164682	Binary	NA	NA	NA	NA	NA	NA	M13_DISCINFECTION
ubm-a-2851	DKTatlas rh insula area	NA	European	Males	2018	11734354	8411	NA	NA	Continuous	Psychiatric / neurological	Elliott LT	30305740	NA	NA	NA	NA
ukb-b-14	Operative procedures - main OPCS: Q17.1 Endoscopic resection of lesion of uterus	MRC-IEU	European	Males and Females	2018	9851867	463010	4910	458100	Binary	NA	Ben Elsworth	NA	NA	SD	NA	41200#Q171: Output from GWAS pipeline using Phesant derived variables from UKBiobank
ebi-a-GCST90001573	Terminally Differentiated CD4-CD8- T cell %CD4-CD8- T cell	NA	European	NA	2020	15141588	3427	NA	NA	NA	NA	Orr<U+00F9> V	32929287	NA	NA	NA	NA
ubm-a-2950	DKTatlas lh rostralanteriorcingulate thickness	NA	European	Males	2018	11734354	8411	NA	NA	Continuous	Psychiatric / neurological	Elliott LT	30305740	NA	NA	NA	NA
ukb-a-595	Diagnoses - main ICD10: Z47 Other orthopaedic follow-up care	Neale Lab	European	Males and Females	2017	10894596	337199	1954	335245	NA	NA	Neale	NA	NA	SD	NA	NA
ukb-b-730	Fresh tomato intake	MRC-IEU	European	Males and Females	2018	9851867	64949	NA	NA	Categorical Ordered	NA	Ben Elsworth	NA	NA	SD	NA	104340: Output from GWAS pipeline using Phesant derived variables from UKBiobank
finn-b-Z21_PROBL_RELATED_LIFESTYLE	Problems related to lifestyle	NA	European	Males and Females	2021	16380417	NA	1408	191362	Binary	NA	NA	NA	NA	NA	NA	Z21_PROBL_RELATED_LIFESTYLE
ebi-a-GCST90016987	Gut microbiota abundance (genus Desulfovibrio id.3173)	NA	European	NA	2021	5459163	14306	NA	NA	NA	NA	Kurilshikov A	33462485	NA	NA	NA	NA
finn-b-CD2_BENIGN_LIPOMATOUS	Benign lipomatous neoplasm	NA	European	Males and Females	2021	16380466	NA	4870	213922	Binary	NA	NA	NA	NA	NA	NA	CD2_BENIGN_LIPOMATOUS
finn-b-E4_OVARDYS	Ovarian dysfunction	NA	European	Males and Females	2021	16379685	NA	942	118228	Binary	NA	NA	NA	NA	NA	NA	E4_OVARDYS
ukb-a-3	Pulse rate automated reading	Neale Lab	European	Males and Females	2017	10894596	317756	NA	NA	NA	NA	Neale	NA	NA	SD	NA	NA
finn-b-H7_EYELIDNAS	Other specified and unspecified disorders of eyelid	NA	European	Males and Females	2021	16380434	NA	125	203231	Binary	NA	NA	NA	NA	NA	NA	H7_EYELIDNAS
ebi-a-GCST90002069	CD4 on CD39+ secreting CD4 regulatory T cell	NA	European	NA	2020	14849646	2920	NA	NA	NA	NA	Orr<U+00F9> V	32929287	NA	NA	NA	NA
finn-b-K11_OESULC	Ulcer of oesophagus	NA	European	Males and Females	2021	16380374	NA	1125	189695	Binary	NA	NA	NA	NA	NA	NA	K11_OESULC
ubm-a-1593	NET100 0437	NA	European	Males	2018	11734354	7916	NA	NA	Continuous	Psychiatric / neurological	Elliott LT	30305740	NA	NA	NA	NA
finn-b-T2D_WIDE	Type 2 diabetes, wide definition	NA	European	Males and Females	2021	16380418	NA	17268	184778	Binary	NA	NA	NA	NA	NA	NA	T2D_WIDE
ubm-a-2797	a2009s lh S collat transv post area	NA	European	Males	2018	11734354	8411	NA	NA	Continuous	Psychiatric / neurological	Elliott LT	30305740	NA	NA	NA	NA
ukb-b-3703	Non-cancer illness code, self-reported: heart arrhythmia	MRC-IEU	European	Males and Females	2018	9851867	462933	2545	460388	Binary	NA	Ben Elsworth	NA	NA	SD	NA	20002#1077: Output from GWAS pipeline using Phesant derived variables from UKBiobank
ukb-b-13864	Operative procedures - secondary OPCS: Z27.6 Ileum	MRC-IEU	European	Males and Females	2018	9851867	463010	4720	458290	Binary	NA	Ben Elsworth	NA	NA	SD	NA	41210#Z276: Output from GWAS pipeline using Phesant derived variables from UKBiobank
prot-a-2448	Receptor-type tyrosine-protein phosphatase S	NA	European	Males and Females	2018	10534735	3301	NA	NA	Immune system	Protein	Sun BB	29875488	NA	NA	NA	NA
ukb-b-17814	Caffeine drink within last hour	MRC-IEU	European	Males and Females	2018	9851867	424873	8991	415882	Binary	NA	Ben Elsworth	NA	NA	SD	NA	3089: Output from GWAS pipeline using Phesant derived variables from UKBiobank
prot-c-3761_4_2	COX-2	NA	European	Males and Females	2019	501428	NA	NA	NA	Continuous	NA	Suhre K	28240269	EFO_0007937	NA	NA	name=Prostaglandin G/H synthase 2; chr=1; start=186671791; end=186680427; entrez=5743; uniprot=P35354
ubm-a-2788	a2009s lh Pole occipital area	NA	European	Males	2018	11734354	8411	NA	NA	Continuous	Psychiatric / neurological	Elliott LT	30305740	NA	NA	NA	NA
met-a-530	X-11537	NA	European	Males and Females	2014	2545623	2719	NA	NA	Metabolites	Unknown metabolite	Shin	24816252	NA	log10 units	0.236	NA
prot-a-164	Armadillo repeat-containing protein 5	NA	European	Males and Females	2018	10534735	3301	NA	NA	Immune system	Protein	Sun BB	29875488	NA	NA	NA	NA
ieu-b-4853	Forced expiratory volume in 1-second	Within family GWAS consortium	European	Males and Females	2022	NA	14444	NA	NA	NA	NA	Howe LJ	NA	EFO:0004314	NA	NA	Sibling estimate
ebi-a-GCST90016965	Gut microbiota abundance (genus Anaerofilum id.2053)	NA	European	NA	2021	5321133	14306	NA	NA	NA	NA	Kurilshikov A	33462485	NA	NA	NA	NA
ubm-a-251	IDP dMRI TBSS MD Corticospinal tract L	NA	European	Males	2018	11734354	7532	NA	NA	Continuous	Psychiatric / neurological	Elliott LT	30305740	NA	NA	NA	NA
finn-b-N14_RENFAIL	Renal failure	NA	European	Males and Females	2021	16380466	NA	5951	212841	Binary	NA	NA	NA	NA	NA	NA	N14_RENFAIL
ukb-a-361	Heel bone mineral density (BMD) T-score automated (left)	Neale Lab	European	Males and Females	2017	10894596	106254	NA	NA	NA	NA	Neale	NA	NA	SD	NA	NA
prot-c-5246_64_3	cGMP-stimulated PDE	NA	European	Males and Females	2019	501428	NA	NA	NA	Continuous	NA	Suhre K	28240269	EFO_0007937	NA	NA	name=cGMP-dependent 3',5'-cyclic phosphodiesterase; chr=11; start=72576141; end=72674591; entrez=5138; uniprot=O00408
prot-a-3092	Protein-tyrosine sulfotransferase 1	NA	European	Males and Females	2018	10534735	3301	NA	NA	Immune system	Protein	Sun BB	29875488	NA	NA	NA	NA
finn-b-H7_GLAUCCLOSEPRIM	Primary angle-closure glaucoma	NA	European	Males and Females	2021	16380446	NA	588	210201	Binary	NA	NA	NA	NA	NA	NA	H7_GLAUCCLOSEPRIM
ubm-a-2313	NET100 1157	NA	European	Males	2018	11734354	7916	NA	NA	Continuous	Psychiatric / neurological	Elliott LT	30305740	NA	NA	NA	NA
prot-a-1825	Mitotic spindle assembly checkpoint protein MAD1	NA	European	Males and Females	2018	10534735	3301	NA	NA	Immune system	Protein	Sun BB	29875488	NA	NA	NA	NA
prot-a-2646	Secretoglobin family 1C member 1	NA	European	Males and Females	2018	10534735	3301	NA	NA	Immune system	Protein	Sun BB	29875488	NA	NA	NA	NA
ukb-d-N13	Diagnoses - main ICD10: N13 Obstructive and reflux uropathy	NA	European	Males and Females	2018	9916449	361194	1359	359835	Binary	NA	Neale lab	NA	NA	NA	NA	NA
ukb-b-4331	6mm weak meridian angle (left)	MRC-IEU	European	Males and Females	2018	9851867	83410	NA	NA	Continuous	NA	Ben Elsworth	NA	NA	SD	NA	5102: Output from GWAS pipeline using Phesant derived variables from UKBiobank
ukb-b-12930	Mouth/teeth dental problems: Dentures	MRC-IEU	European	Males and Females	2018	9851867	461113	77732	383381	Binary	NA	Ben Elsworth	NA	NA	SD	NA	6149#6: Output from GWAS pipeline using Phesant derived variables from UKBiobank
prot-a-2374	cGMP-dependent protein kinase 1, beta isozyme	NA	European	Males and Females	2018	10534735	3301	NA	NA	Immune system	Protein	Sun BB	29875488	NA	NA	NA	NA
finn-b-CD2_BENIGN_MOUTH_PHARYNX	Benign neoplasm of mouth and pharynx	NA	European	Males and Females	2021	16380466	NA	1655	217137	Binary	NA	NA	NA	NA	NA	NA	CD2_BENIGN_MOUTH_PHARYNX
ukb-b-15326	Vitamin and/or mineral supplement use: Multivitamin with iron	MRC-IEU	European	Males and Females	2018	9851867	64949	1628	63321	Binary	NA	Ben Elsworth	NA	NA	SD	NA	20084#469: Output from GWAS pipeline using Phesant derived variables from UKBiobank
ubm-a-1169	NET100 0013	NA	European	Males	2018	11734354	7916	NA	NA	Continuous	Psychiatric / neurological	Elliott LT	30305740	NA	NA	NA	NA
ukb-b-311	White wine intake	MRC-IEU	European	Males and Females	2018	9851867	64949	NA	NA	Categorical Ordered	NA	Ben Elsworth	NA	NA	SD	NA	100670: Output from GWAS pipeline using Phesant derived variables from UKBiobank
ubm-a-2075	NET100 0919	NA	European	Males	2018	11734354	7916	NA	NA	Continuous	Psychiatric / neurological	Elliott LT	30305740	NA	NA	NA	NA
prot-c-2859_69_2	HDAC8	NA	European	Males and Females	2019	501428	NA	NA	NA	Continuous	NA	Suhre K	28240269	EFO_0007937	NA	NA	name=Histone deacetylase 8; chr=X; start=72329516; end=72573103; entrez=55869; uniprot=Q9BY41
ebi-a-GCST90010261	Spondin-1 levels	NA	European	NA	2020	18217568	1314	NA	NA	NA	NA	Gilly A	33303764	NA	NA	NA	NA
prot-a-1659	Kallikrein-14	NA	European	Males and Females	2018	10534735	3301	NA	NA	Immune system	Protein	Sun BB	29875488	NA	NA	NA	NA
ebi-a-GCST90000463	CXCL9 levels	NA	European	NA	2020	7883871	982	NA	NA	NA	NA	Hillary RF	32641083	NA	NA	NA	NA
ubm-a-2582	NET100 1426	NA	European	Males	2018	11734354	7916	NA	NA	Continuous	Psychiatric / neurological	Elliott LT	30305740	NA	NA	NA	NA
prot-a-118	Amyloid beta A4 precursor protein-binding family B member 3	NA	European	Males and Females	2018	10534735	3301	NA	NA	Immune system	Protein	Sun BB	29875488	NA	NA	NA	NA
ebi-a-GCST90011460	OTU99_47 (Prevotella) abundance	NA	European	NA	2021	5576639	8956	NA	NA	NA	NA	R<U+00FC>hlemann MC	33462482	NA	NA	NA	NA
ukb-b-12623	Non-cancer illness code, self-reported: headaches (not migraine)	MRC-IEU	European	Males and Females	2018	9851867	462933	3917	459016	Binary	NA	Ben Elsworth	NA	NA	SD	NA	20002#1436: Output from GWAS pipeline using Phesant derived variables from UKBiobank
ukb-d-22617_3119	Job SOC coding: Science and engineering technicians n.e.c.	NA	European	Males and Females	2018	10465621	91149	2018	89131	Binary	NA	Neale lab	NA	NA	NA	NA	NA
prot-c-3600_2_3	Chitotriosidase-1	NA	European	Males and Females	2019	501428	NA	NA	NA	Continuous	NA	Suhre K	28240269	EFO_0007937	NA	NA	name=Chitotriosidase-1; chr=1; start=203212827; end=203273641; entrez=1118; uniprot=Q13231
prot-a-2317	Podocalyxin	NA	European	Males and Females	2018	10534735	3301	NA	NA	Immune system	Protein	Sun BB	29875488	NA	NA	NA	NA
ukb-b-1939	Operative procedures - main OPCS: F09.1 Surgical removal of impacted wisdom tooth	MRC-IEU	European	Males and Females	2018	9851867	463010	1705	461305	Binary	NA	Ben Elsworth	NA	NA	SD	NA	41200#F091: Output from GWAS pipeline using Phesant derived variables from UKBiobank
finn-b-N14_ACUTENEPHRITIC	Acute nephritic syndrome	NA	European	Males and Females	2021	16380437	NA	335	214619	Binary	NA	NA	NA	NA	NA	NA	N14_ACUTENEPHRITIC
ukb-b-19791	PCT where patients GP was registered: ROTHERHAM PCT	MRC-IEU	European	Males and Females	2018	9851867	463010	3112	459898	Binary	NA	Ben Elsworth	NA	NA	SD	NA	41230#5H8: Output from GWAS pipeline using Phesant derived variables from UKBiobank
ubm-a-868	IDP dMRI ProbtrackX ISOVF str r	NA	European	Males	2018	11734354	7532	NA	NA	Continuous	Psychiatric / neurological	Elliott LT	30305740	NA	NA	NA	NA
finn-b-J10_SINUSITIS	Acute sinusitis	NA	European	Males and Females	2021	16380415	NA	10916	182945	Binary	NA	NA	NA	NA	NA	NA	J10_SINUSITIS
ubm-a-2913	a2009s rh S oc-temp med&Lingual area	NA	European	Males	2018	11734354	8411	NA	NA	Continuous	Psychiatric / neurological	Elliott LT	30305740	NA	NA	NA	NA
prot-a-2461	Pyrin domain-containing protein 1	NA	European	Males and Females	2018	10534735	3301	NA	NA	Immune system	Protein	Sun BB	29875488	NA	NA	NA	NA
ebi-a-GCST90011397	OTU97_39 (Proteobacteria) abundance	NA	European	NA	2021	5451207	8956	NA	NA	NA	NA	R<U+00FC>hlemann MC	33462482	NA	NA	NA	NA
met-a-372	X-03088	NA	European	Males and Females	2014	2545577	7474	NA	NA	Metabolites	Unknown metabolite	Shin	24816252	NA	log10 units	0.157475	NA
ubm-a-275	IDP dMRI TBSS MD Sagittal stratum L	NA	European	Males	2018	11734354	7532	NA	NA	Continuous	Psychiatric / neurological	Elliott LT	30305740	NA	NA	NA	NA
ubm-a-702	IDP dMRI ProbtrackX MO ptr r	NA	European	Males	2018	11734354	7532	NA	NA	Continuous	Psychiatric / neurological	Elliott LT	30305740	NA	NA	NA	NA
ubm-a-2331	NET100 1175	NA	European	Males	2018	11734354	7916	NA	NA	Continuous	Psychiatric / neurological	Elliott LT	30305740	NA	NA	NA	NA
ubm-a-1914	NET100 0758	NA	European	Males	2018	11734354	7916	NA	NA	Continuous	Psychiatric / neurological	Elliott LT	30305740	NA	NA	NA	NA
ukb-a-384	Tinnitus: Yes now some of the time	Neale Lab	European	Males and Females	2017	10894596	109411	9796	99615	NA	NA	Neale	NA	NA	SD	NA	NA
ieu-a-31	Inflammatory bowel disease	IIBDGC	European	Males and Females	2015	12716084	34652	12882	21770	Disease	Autoimmune / inflammatory	Liu	26192919	NA	log odds	NA	NA
prot-a-2120	Netrin-G1	NA	European	Males and Females	2018	10534735	3301	NA	NA	Immune system	Protein	Sun BB	29875488	NA	NA	NA	NA
met-a-447	Hyodeoxycholate	NA	European	Males and Females	2014	2544532	6025	NA	NA	Metabolites	Lipid	Shin	24816252	NA	log10 units	0.343203	NA
ukb-d-22601_41503307	Job coding: general office assistant/clerk, clerical officer, clerk-typist, office supervisor, press/newspaper corrector/reader	NA	European	Males and Females	2018	11631585	89866	3957	85909	Binary	NA	Neale lab	NA	NA	NA	NA	NA
prot-c-5028_59_1	sCD163	NA	European	Males and Females	2019	501428	NA	NA	NA	Continuous	NA	Suhre K	28240269	EFO_0007937	NA	NA	name=Scavenger receptor cysteine-rich type 1 protein M130; chr=12; start=7470813; end=7503893; entrez=9332; uniprot=Q86VB7
prot-a-3052	Tumor necrosis factor receptor superfamily member 6B	NA	European	Males and Females	2018	10534735	3301	NA	NA	Immune system	Protein	Sun BB	29875488	NA	NA	NA	NA
ebi-a-GCST90001969	FSC-A on Natural Killer	NA	European	NA	2020	14903739	3113	NA	NA	NA	NA	Orr<U+00F9> V	32929287	NA	NA	NA	NA
ukb-b-13231	Place of birth in UK - east co-ordinate	MRC-IEU	European	Males and Females	2018	9851867	434576	NA	NA	Continuous	NA	Ben Elsworth	NA	NA	SD	NA	130: Output from GWAS pipeline using Phesant derived variables from UKBiobank
prot-a-1335	Hepatocyte growth factor-regulated tyrosine kinase substrate	NA	European	Males and Females	2018	10534735	3301	NA	NA	Immune system	Protein	Sun BB	29875488	NA	NA	NA	NA
prot-a-3068	Tenascin-R	NA	European	Males and Females	2018	10534735	3301	NA	NA	Immune system	Protein	Sun BB	29875488	NA	NA	NA	NA
met-d-VLDL_L	Total lipids in VLDL	NA	European	Males and Females	2020	12321875	115078	NA	NA	Continuous	NA	Borges CM	NA	NA	NA	NA	NA
finn-b-R18_ELEVATED_ERYTHROCYTE_SEDIM_RATE_ABNORMALITY_PLASMA_VISCO	Elevated erythrocyte sedimentation rate and abnormality of plasma viscosity	NA	European	Males and Females	2021	16380460	NA	1093	212004	Binary	NA	NA	NA	NA	NA	NA	R18_ELEVATED_ERYTHROCYTE_SEDIM_RATE_ABNORMALITY_PLASMA_VISCO
ieu-a-276	Celiac disease	NA	European	Males and Females	2010	523399	15283	4533	10750	Disease	Autoimmune / inflammatory	Dubois PC	20190752	NA	log odds	NA	Effect allele frequencies are missing
finn-b-Q17_OTHER_CONGEN_MALFO_NOT_ELSEW_CLASSIFIED	Other congenital malformations, not elsewhere classified	NA	European	Males and Females	2021	16380460	NA	92	217483	Binary	NA	NA	NA	NA	NA	NA	Q17_OTHER_CONGEN_MALFO_NOT_ELSEW_CLASSIFIED
met-a-714	Threitol	NA	European	Males and Females	2014	2545964	7381	NA	NA	Metabolites	Carbohydrate	Shin	24816252	NA	log10 units	0.198696	NA
finn-b-CD2_BENIGN_BONE_SHORT_UPPER	Benign neoplasm: Short bones of upper limb	NA	European	Males and Females	2021	16380466	NA	195	218597	Binary	NA	NA	NA	NA	NA	NA	CD2_BENIGN_BONE_SHORT_UPPER
ukb-a-150	Treatment/medication code: amlodipine	Neale Lab	European	Males and Females	2017	10894596	337159	13693	323466	NA	NA	Neale	NA	NA	SD	NA	NA
prot-a-1415	Gamma-interferon-inducible protein 16	NA	European	Males and Females	2018	10534735	3301	NA	NA	Immune system	Protein	Sun BB	29875488	NA	NA	NA	NA
met-a-671	X-12990--docosapentaenoic acid (n6-DPA)	NA	European	Males and Females	2014	2545878	2581	NA	NA	Metabolites	Fatty acid	Shin	24816252	NA	log10 units	0.179563	NA
prot-a-2708	14-3-3 protein sigma	NA	European	Males and Females	2018	10534735	3301	NA	NA	Immune system	Protein	Sun BB	29875488	NA	NA	NA	NA
ukb-b-14303	Values entered	MRC-IEU	European	Males and Females	2018	9851867	113410	NA	NA	Continuous	NA	Ben Elsworth	NA	NA	SD	NA	20229: Output from GWAS pipeline using Phesant derived variables from UKBiobank
prot-a-1147	Follistatin-related protein 5	NA	European	Males and Females	2018	10534735	3301	NA	NA	Immune system	Protein	Sun BB	29875488	NA	NA	NA	NA
finn-b-CD2_NONFOLLICULAR_LYMPHOMA_EXALLC	Non-follicular lymphoma (all cancers excluded)	NA	European	Males and Females	2021	16380340	NA	1283	180756	Binary	NA	NA	NA	NA	NA	NA	CD2_NONFOLLICULAR_LYMPHOMA_EXALLC
finn-b-K11_CROHN	Crohn disease	NA	European	Males and Females	2021	16380455	NA	2056	210300	Binary	NA	NA	NA	NA	NA	NA	K11_CROHN
ukb-b-10733	Operation code: fertility treatment procedures	MRC-IEU	European	Males and Females	2018	9851867	462933	1185	461748	Binary	NA	Ben Elsworth	NA	NA	SD	NA	20004#1475: Output from GWAS pipeline using Phesant derived variables from UKBiobank
ubm-a-2779	a2009s lh G temp sup-G T transv area	NA	European	Males	2018	11734354	8411	NA	NA	Continuous	Psychiatric / neurological	Elliott LT	30305740	NA	NA	NA	NA
finn-b-AB1_SEQULAE_INF_NOS	Sequelae of other and unspecified infectious and parasitic diseases	NA	European	Males and Females	2021	16380466	NA	936	217489	Binary	NA	NA	NA	NA	NA	NA	AB1_SEQULAE_INF_NOS
ebi-a-GCST90001669	CD28+ CD45RA- CD8dim T cell Absolute Count	NA	European	NA	2020	15135292	3408	NA	NA	NA	NA	Orr<U+00F9> V	32929287	NA	NA	NA	NA
finn-b-F5_OTHPER	Other specified and unspecified personality disorders	NA	European	Males and Females	2021	16380456	NA	2000	212179	Binary	NA	NA	NA	NA	NA	NA	F5_OTHPER
ebi-a-GCST90001498	Activated & resting CD4 regulatory T cell Absolute Count	NA	European	NA	2020	15131843	3405	NA	NA	NA	NA	Orr<U+00F9> V	32929287	NA	NA	NA	NA
prot-a-1251	Glycoprotein hormone alpha-2	NA	European	Males and Females	2018	10534735	3301	NA	NA	Immune system	Protein	Sun BB	29875488	NA	NA	NA	NA
ukb-b-13922	Sources of admission to hospital (recoded): Other admission source	MRC-IEU	European	Males and Females	2018	9851867	461365	2158	459207	Binary	NA	Ben Elsworth	NA	NA	SD	NA	41251#10000: Output from GWAS pipeline using Phesant derived variables from UKBiobank
ukb-b-8266	Other egg intake	MRC-IEU	European	Males and Females	2018	9851867	64942	NA	NA	Categorical Ordered	NA	Ben Elsworth	NA	NA	SD	NA	102980: Output from GWAS pipeline using Phesant derived variables from UKBiobank
finn-b-H7_DISORDERLENSNAS	Other specified and unspecified disorders of lens	NA	European	Males and Females	2021	16380384	NA	100	189604	Binary	NA	NA	NA	NA	NA	NA	H7_DISORDERLENSNAS
prot-a-2068	Palmitoleoyl-protein carboxylesterase NOTUM	NA	European	Males and Females	2018	10534735	3301	NA	NA	Immune system	Protein	Sun BB	29875488	NA	NA	NA	NA
ebi-a-GCST90001778	CD25 on IgD+ CD24+ B cell	NA	European	NA	2020	15048951	3657	NA	NA	NA	NA	Orr<U+00F9> V	32929287	NA	NA	NA	NA
ebi-a-GCST005059	Serum albumin level	NA	European	NA	2017	24314123	9824	NA	NA	NA	NA	Prins BP	28887542	NA	NA	NA	NA
ukb-a-257	Hearing difficulty/problems: Yes	Neale Lab	European	Males and Females	2017	10894596	323978	84839	239139	NA	NA	Neale	NA	NA	SD	NA	NA
ukb-a-391	Average weekly intake of other alcoholic drinks	Neale Lab	European	Males and Females	2017	10894596	79291	NA	NA	NA	NA	Neale	NA	NA	SD	NA	NA
finn-b-DM_MACULOPATHY	Diabetic maculopathy (DM_MACULOPATHY)	NA	European	Males and Females	2021	16380450	NA	1811	211566	Binary	NA	NA	NA	NA	NA	NA	DM_MACULOPATHY
prot-a-750	C-X-C motif chemokine 9	NA	European	Males and Females	2018	10534735	3301	NA	NA	Immune system	Protein	Sun BB	29875488	NA	NA	NA	NA
ukb-b-2909	Variation in diet	MRC-IEU	European	Males and Females	2018	9851867	460884	NA	NA	Categorical Ordered	NA	Ben Elsworth	NA	NA	SD	NA	1548: Output from GWAS pipeline using Phesant derived variables from UKBiobank
ubm-a-2367	NET100 1211	NA	European	Males	2018	11734354	7916	NA	NA	Continuous	Psychiatric / neurological	Elliott LT	30305740	NA	NA	NA	NA
ubm-a-2268	NET100 1112	NA	European	Males	2018	11734354	7916	NA	NA	Continuous	Psychiatric / neurological	Elliott LT	30305740	NA	NA	NA	NA
prot-a-1923	Multimerin-2	NA	European	Males and Females	2018	10534735	3301	NA	NA	Immune system	Protein	Sun BB	29875488	NA	NA	NA	NA
ieu-b-4843	HDL cholesterol	Within family GWAS consortium	European	Males and Females	2022	NA	37120	NA	NA	NA	NA	Howe LJ	NA	EFO:0004612	NA	NA	Sibling estimate
met-a-739	Dimethylarginine (SDMA + ADMA)	NA	European	Males and Females	2014	2545585	7347	NA	NA	Metabolites	Amino acid	Shin	24816252	NA	log10 units	0.0902897	NA
ubm-a-1277	NET100 0121	NA	European	Males	2018	11734354	7916	NA	NA	Continuous	Psychiatric / neurological	Elliott LT	30305740	NA	NA	NA	NA
finn-b-L12_PEMPHIGOID_BULL	Bullous pemphigoid	NA	European	Males and Females	2021	16380466	NA	219	218066	Binary	NA	NA	NA	NA	NA	NA	L12_PEMPHIGOID_BULL
ukb-b-11484	Diagnoses - secondary ICD10: Z51.1 Chemotherapy session for neoplasm	MRC-IEU	European	Males and Females	2018	9851867	463010	7714	455296	Binary	NA	Ben Elsworth	NA	NA	SD	NA	41204#Z511: Output from GWAS pipeline using Phesant derived variables from UKBiobank
ukb-b-17881	Potassium	MRC-IEU	European	Males and Females	2018	9851867	64979	NA	NA	Continuous	NA	Ben Elsworth	NA	NA	SD	NA	100016: Output from GWAS pipeline using Phesant derived variables from UKBiobank
prot-a-2288	Group IIE secretory phospholipase A2	NA	European	Males and Females	2018	10534735	3301	NA	NA	Immune system	Protein	Sun BB	29875488	NA	NA	NA	NA
met-a-349	Heptanoate (7:0)	NA	European	Males and Females	2014	2545680	7802	NA	NA	Metabolites	Fatty acid	Shin	24816252	NA	log10 units	0.120934	NA
prot-a-1241	Aspartate aminotransferase, cytoplasmic	NA	European	Males and Females	2018	10534735	3301	NA	NA	Immune system	Protein	Sun BB	29875488	NA	NA	NA	NA
ebi-a-GCST004941	Dehydroepiandrosterone sulphate levels	NA	European	NA	2017	21770677	9722	NA	NA	NA	NA	Prins BP	28887542	NA	NA	NA	NA
finn-b-CD2_BENIGN	Benign neoplasms	NA	European	Males and Females	2021	16380466	NA	52384	166408	Binary	NA	NA	NA	NA	NA	NA	CD2_BENIGN
ubm-a-2660	volume Left-Thalamus-Proper	NA	European	Males	2018	11734354	8411	NA	NA	Continuous	Psychiatric / neurological	Elliott LT	30305740	NA	NA	NA	NA
prot-a-285	Transmembrane protein C16orf54	NA	European	Males and Females	2018	10534735	3301	NA	NA	Immune system	Protein	Sun BB	29875488	NA	NA	NA	NA
ukb-a-336	Forced vital capacity (FVC)	Neale Lab	European	Males and Females	2017	10894596	307638	NA	NA	NA	NA	Neale	NA	NA	SD	NA	NA
ubm-a-939	NODEamps100 0048	NA	European	Males	2018	11734354	7916	NA	NA	Continuous	Psychiatric / neurological	Elliott LT	30305740	NA	NA	NA	NA
prot-a-233	B-cell receptor-associated protein 29	NA	European	Males and Females	2018	10534735	3301	NA	NA	Immune system	Protein	Sun BB	29875488	NA	NA	NA	NA
ukb-b-11411	Blood clot, DVT, bronchitis, emphysema, asthma, rhinitis, eczema, allergy diagnosed by doctor: Blood clot in the leg (DVT)	MRC-IEU	European	Males and Females	2018	9851867	462013	9440	452573	Binary	NA	Ben Elsworth	NA	NA	SD	NA	6152#5: Output from GWAS pipeline using Phesant derived variables from UKBiobank
ubm-a-417	IDP dMRI TBSS L2 Posterior thalamic radiation L	NA	European	Males	2018	11734354	7532	NA	NA	Continuous	Psychiatric / neurological	Elliott LT	30305740	NA	NA	NA	NA
ebi-a-GCST003770	Neuroticism	NA	European	NA	2016	6023769	170911	NA	NA	NA	NA	Okbay A	27089181	NA	NA	NA	NA
ukb-a-342	Number of cigarettes currently smoked daily (current cigarette smokers)	Neale Lab	European	Males and Females	2017	10894596	23205	NA	NA	NA	NA	Neale	NA	NA	SD	NA	NA
prot-a-3026	Transmembrane protease serine 5	NA	European	Males and Females	2018	10534735	3301	NA	NA	Immune system	Protein	Sun BB	29875488	NA	NA	NA	NA
ukb-b-9686	Sweet potato intake	MRC-IEU	European	Males and Females	2018	9851867	64945	NA	NA	Categorical Ordered	NA	Ben Elsworth	NA	NA	SD	NA	104330: Output from GWAS pipeline using Phesant derived variables from UKBiobank
prot-a-2980	Metalloproteinase inhibitor 4	NA	European	Males and Females	2018	10534735	3301	NA	NA	Immune system	Protein	Sun BB	29875488	NA	NA	NA	NA
ebi-a-GCST006328	Extraversion	NA	European	NA	2010	2300116	17375	NA	NA	NA	NA	de Moor MH	21173776	NA	NA	NA	NA
prot-a-2802	Sortilin	NA	European	Males and Females	2018	10534735	3301	NA	NA	Immune system	Protein	Sun BB	29875488	NA	NA	NA	NA
ubm-a-1165	NET100 0009	NA	European	Males	2018	11734354	7916	NA	NA	Continuous	Psychiatric / neurological	Elliott LT	30305740	NA	NA	NA	NA
ukb-b-3759	Treatment speciality of consultant (recoded): Gynaecology	MRC-IEU	European	Males and Females	2018	9851867	447061	60451	386610	Binary	NA	Ben Elsworth	NA	NA	SD	NA	41246#1580: Output from GWAS pipeline using Phesant derived variables from UKBiobank
ieu-a-990	Bulimia nervosa	NA	European	Females	2013	11846513	2442	151	2291	Disease	Psychiatric / neurological	Wade TD	23568457	NA	log odds	NA	NA
finn-b-CD2_BENIGN_CONNSOFT_TRUNK_EXALLC	"Benign neoplasm: Connective and other soft tissue of trunk, unspecified" (all cancers excluded)	NA	European	Males and Females	2021	16380337	NA	88	180695	Binary	NA	NA	NA	NA	NA	NA	CD2_BENIGN_CONNSOFT_TRUNK_EXALLC
ebi-a-GCST90001592	CD8+ T cell Absolute Count	NA	European	NA	2020	15195743	3652	NA	NA	NA	NA	Orr<U+00F9> V	32929287	NA	NA	NA	NA
prot-a-2312	Mismatch repair endonuclease PMS2	NA	European	Males and Females	2018	10534735	3301	NA	NA	Immune system	Protein	Sun BB	29875488	NA	NA	NA	NA
prot-c-2775_54_2	IL-17F	NA	European	Males and Females	2019	501428	NA	NA	NA	Continuous	NA	Suhre K	28240269	EFO_0007937	NA	NA	name=Interleukin-17F; chr=6; start=52236681; end=52244537; entrez=112744; uniprot=Q96PD4
ubm-a-1683	NET100 0527	NA	European	Males	2018	11734354	7916	NA	NA	Continuous	Psychiatric / neurological	Elliott LT	30305740	NA	NA	NA	NA
met-b-200	CD4mem:%Th1* (1)	NA	European	Females	2015	1628210	497	NA	NA	Immune system	Immune cell subset frequency	Roederer	25772697	NA	%	1.03144	Female twins
ukb-b-6852	3mm strong meridian (right)	MRC-IEU	European	Males and Females	2018	9851867	96007	NA	NA	Continuous	NA	Ben Elsworth	NA	NA	SD	NA	5132: Output from GWAS pipeline using Phesant derived variables from UKBiobank
finn-b-TBC_RESP	Respiratory tuberculosis	NA	European	Males and Females	2021	16380466	NA	849	217632	Binary	NA	NA	NA	NA	NA	NA	TBC_RESP
ukb-b-12176	PCT where patients GP was registered: KNOWSLEY PCT	MRC-IEU	European	Males and Females	2018	9851867	463010	1492	461518	Binary	NA	Ben Elsworth	NA	NA	SD	NA	41230#5J4: Output from GWAS pipeline using Phesant derived variables from UKBiobank
ebi-a-GCST90017093	Gut microbiota abundance (order Bifidobacteriales id.432)	NA	European	NA	2021	5668532	14306	NA	NA	NA	NA	Kurilshikov A	33462485	NA	NA	NA	NA
ebi-a-GCST90017058	Gut microbiota abundance (genus Ruminococcaceae UCG010 id.11367)	NA	European	NA	2021	5545122	14306	NA	NA	NA	NA	Kurilshikov A	33462485	NA	NA	NA	NA
ukb-b-5644	PCT responsible for patient data: ISLINGTON PCT	MRC-IEU	European	Males and Females	2018	9851867	463010	1011	461999	Binary	NA	Ben Elsworth	NA	NA	SD	NA	41229#5K8: Output from GWAS pipeline using Phesant derived variables from UKBiobank
finn-b-G6_PARALOTHUNS	Other and unspecified paralytic syndromes	NA	European	Males and Females	2021	16380461	NA	189	216992	Binary	NA	NA	NA	NA	NA	NA	G6_PARALOTHUNS
ukb-b-227	Operative procedures - main OPCS: U20.1 Transthoracic echocardiography	MRC-IEU	European	Males and Females	2018	9851867	463010	1388	461622	Binary	NA	Ben Elsworth	NA	NA	SD	NA	41200#U201: Output from GWAS pipeline using Phesant derived variables from UKBiobank
met-c-876	Free cholesterol in large HDL	NA	European	Males and Females	2016	11869426	21559	NA	NA	Metabolites	Lipid	Kettunen	27005778	NA	SD	0.14	L.HDL.FC; SD value comes from the original untransformed distribution of the ERF cohort
ubm-a-1261	NET100 0105	NA	European	Males	2018	11734354	7916	NA	NA	Continuous	Psychiatric / neurological	Elliott LT	30305740	NA	NA	NA	NA
ebi-a-GCST000612	Celiac disease	NA	European	NA	2010	518292	15283	4533	10750	NA	NA	Dubois PC	20190752	NA	logOR	NA	beta+se converted from OR+CI;
prot-a-1559	Insulin-induced gene 1 protein	NA	European	Males and Females	2018	10534735	3301	NA	NA	Immune system	Protein	Sun BB	29875488	NA	NA	NA	NA
ukb-b-11348	Bread intake	MRC-IEU	European	Males and Females	2018	9851867	452236	NA	NA	Continuous	NA	Ben Elsworth	NA	NA	SD	NA	1438: Output from GWAS pipeline using Phesant derived variables from UKBiobank
prot-a-3084	Thiamin pyrophosphokinase 1	NA	European	Males and Females	2018	10534735	3301	NA	NA	Immune system	Protein	Sun BB	29875488	NA	NA	NA	NA
finn-b-H7_PTERYGIUM	Pterygium	NA	European	Males and Females	2021	16380437	NA	363	203517	Binary	NA	NA	NA	NA	NA	NA	H7_PTERYGIUM
ubm-a-1594	NET100 0438	NA	European	Males	2018	11734354	7916	NA	NA	Continuous	Psychiatric / neurological	Elliott LT	30305740	NA	NA	NA	NA
finn-b-J10_OTHERINSTPULM	Other insterstitial pulmonary diseases	NA	European	Males and Females	2021	16380466	NA	1969	216363	Binary	NA	NA	NA	NA	NA	NA	J10_OTHERINSTPULM
met-d-M_HDL_P	Concentration of medium HDL particles	NA	European	Males and Females	2020	12321875	115078	NA	NA	Continuous	NA	Borges CM	NA	NA	NA	NA	NA
ukb-b-18335	Wheeze or whistling in the chest in last year	MRC-IEU	European	Males and Females	2018	9851867	453959	95131	358828	Binary	NA	Ben Elsworth	NA	NA	SD	NA	2316: Output from GWAS pipeline using Phesant derived variables from UKBiobank
ubm-a-2219	NET100 1063	NA	European	Males	2018	11734354	7916	NA	NA	Continuous	Psychiatric / neurological	Elliott LT	30305740	NA	NA	NA	NA
ieu-b-4953	Liver cell carcinoma	UK Biobank	European	Males and Females	2021	6304034	372184	168	372016	Disease	Cancer	Burrows	NA	EFO:0000182	NA	NA	NA
prot-a-149	Rho GTPase-activating protein 30	NA	European	Males and Females	2018	10534735	3301	NA	NA	Immune system	Protein	Sun BB	29875488	NA	NA	NA	NA
ukb-a-264	Body fat percentage	Neale Lab	European	Males and Females	2017	10894596	331117	NA	NA	NA	NA	Neale	NA	NA	SD	NA	NA
ukb-d-AB1_INTESTINAL_INFECTIONS	Intestinal infectious diseases	NA	European	Males and Females	2018	11777016	361194	4304	356890	Binary	NA	Neale lab	NA	NA	NA	NA	NA
ubm-a-906	NODEamps100 0015	NA	European	Males	2018	11734354	7916	NA	NA	Continuous	Psychiatric / neurological	Elliott LT	30305740	NA	NA	NA	NA
ebi-a-GCST90000485	Monocyte chemoattractant protein-3 levels	NA	European	NA	2020	7883872	982	NA	NA	NA	NA	Hillary RF	32641083	NA	NA	NA	NA
ebi-a-GCST90012047	Myoglobin levels	NA	European	NA	2020	13135897	21758	NA	NA	NA	NA	Folkersen L	33067605	NA	NA	NA	NA
finn-b-I9_E_DRONE	Dronedarone medication	NA	European	Males and Females	2021	16380164	NA	424	156711	Binary	NA	NA	NA	NA	NA	NA	I9_E_DRONE
prot-a-545	Neural cell adhesion molecule L1-like protein	NA	European	Males and Females	2018	10534735	3301	NA	NA	Immune system	Protein	Sun BB	29875488	NA	NA	NA	NA
ebi-a-GCST90001952	CD33 on Monocytic Myeloid-Derived Suppressor Cells	NA	European	NA	2020	14120721	1569	NA	NA	NA	NA	Orr<U+00F9> V	32929287	NA	NA	NA	NA
ubm-a-2740	DKTatlas lh superiorfrontal area	NA	European	Males	2018	11734354	8411	NA	NA	Continuous	Psychiatric / neurological	Elliott LT	30305740	NA	NA	NA	NA
prot-a-1620	BTB/POZ domain-containing protein KCTD5	NA	European	Males and Females	2018	10534735	3301	NA	NA	Immune system	Protein	Sun BB	29875488	NA	NA	NA	NA
prot-a-2066	NoneX	NA	European	Males and Females	2018	10534735	3301	NA	NA	Immune system	Protein	Sun BB	29875488	NA	NA	NA	NA
ebi-a-GCST90002002	PDL-1 on monocyte	NA	European	NA	2020	15034296	3629	NA	NA	NA	NA	Orr<U+00F9> V	32929287	NA	NA	NA	NA
ieu-a-104	Waist circumference	GIANT	European	Males	2013	2744366	60586	NA	NA	Risk factor	Anthropometric	Randall JC	23754948	NA	SD (cm)	12.52	Adjusted for BMI
prot-a-2933	TATA-box-binding protein	NA	European	Males and Females	2018	10534735	3301	NA	NA	Immune system	Protein	Sun BB	29875488	NA	NA	NA	NA
ubm-a-2679	volume Right-Caudate	NA	European	Males	2018	11734354	8411	NA	NA	Continuous	Psychiatric / neurological	Elliott LT	30305740	NA	NA	NA	NA
finn-b-PSOR_ARTHR_OTH	Other psoriatic arthropathies	NA	European	Males and Females	2021	16380466	NA	1433	217013	Binary	NA	NA	NA	NA	NA	NA	PSOR_ARTHR_OTH
prot-a-1182	GTP cyclohydrolase 1	NA	European	Males and Females	2018	10534735	3301	NA	NA	Immune system	Protein	Sun BB	29875488	NA	NA	NA	NA
ebi-a-GCST002221	Cholesterol, total	NA	European	NA	2013	2418562	94595	NA	NA	NA	NA	Willer CJ	24097068	NA	NA	NA	NA
met-a-637	X-12645	NA	European	Males and Females	2014	2546263	5254	NA	NA	Metabolites	Unknown metabolite	Shin	24816252	NA	log10 units	0.197797	NA
ebi-a-GCST90011491	TestASV_15 (Bacteroides) abundance	NA	European	NA	2021	5543871	8956	NA	NA	NA	NA	R<U+00FC>hlemann MC	33462482	NA	NA	NA	NA
ukb-b-20437	Current employment status: Full or part-time student	MRC-IEU	European	Males and Females	2018	9851867	461242	3755	457487	Binary	NA	Ben Elsworth	NA	NA	SD	NA	6142#7: Output from GWAS pipeline using Phesant derived variables from UKBiobank
finn-b-E4_HYPODRUG	Drug-induced hypoglycaemia without coma	NA	European	Males and Females	2021	16380465	NA	224	217509	Binary	NA	NA	NA	NA	NA	NA	E4_HYPODRUG
ubm-a-415	IDP dMRI TBSS L2 Posterior corona radiata L	NA	European	Males	2018	11734354	7532	NA	NA	Continuous	Psychiatric / neurological	Elliott LT	30305740	NA	NA	NA	NA
ebi-a-GCST90011316	F_Rikenellaceae abundance	NA	European	NA	2021	5440348	8956	NA	NA	NA	NA	R<U+00FC>hlemann MC	33462482	NA	NA	NA	NA
finn-b-N14_URETHRALSTRICT	Urethral stricture	NA	European	Males and Females	2021	16380411	NA	787	195140	Binary	NA	NA	NA	NA	NA	NA	N14_URETHRALSTRICT
ukb-b-18042	Illnesses of siblings: Diabetes	MRC-IEU	European	Males and Females	2018	9851867	362826	31073	331753	Binary	NA	Ben Elsworth	NA	NA	SD	NA	20111#9: Output from GWAS pipeline using Phesant derived variables from UKBiobank
ubm-a-2725	DKTatlas lh lingual area	NA	European	Males	2018	11734354	8411	NA	NA	Continuous	Psychiatric / neurological	Elliott LT	30305740	NA	NA	NA	NA
ubm-a-1203	NET100 0047	NA	European	Males	2018	11734354	7916	NA	NA	Continuous	Psychiatric / neurological	Elliott LT	30305740	NA	NA	NA	NA
finn-b-I9_CVD_HARD	Hard cardiovascular diseases	NA	European	Males and Females	2021	16380466	NA	29350	189442	Binary	NA	NA	NA	NA	NA	NA	I9_CVD_HARD
ieu-b-44	Fresh fruit intake	NA	European	Males and Females	2020	NA	223014	NA	NA	Risk factor	Behavioural	Lyon	NA	NA	NA	NA	NA
prot-a-2601	Ribonucleoside-diphosphate reductase large subunit	NA	European	Males and Females	2018	10534735	3301	NA	NA	Immune system	Protein	Sun BB	29875488	NA	NA	NA	NA
ukb-b-10629	6mm asymmetry index (left)	MRC-IEU	European	Males and Females	2018	9851867	51739	NA	NA	Continuous	NA	Ben Elsworth	NA	NA	SD	NA	5157: Output from GWAS pipeline using Phesant derived variables from UKBiobank
ukb-b-12267	Diagnoses - main ICD10: I80.2 Phlebitis and thrombophlebitis of other deep vessels of lower extremities	MRC-IEU	European	Males and Females	2018	9851867	463010	1832	461178	Binary	NA	Ben Elsworth	NA	NA	SD	NA	41202#I802: Output from GWAS pipeline using Phesant derived variables from UKBiobank
ubm-a-1002	NET25 0056	NA	European	Males	2018	11734354	7916	NA	NA	Continuous	Psychiatric / neurological	Elliott LT	30305740	NA	NA	NA	NA
prot-b-2	interleukin 6	NA	European	Males and Females	2018	5270646	3394	NA	NA	Immune system	Protein	Folkersen L	28369058	NA	NA	NA	NA
ubm-a-2370	NET100 1214	NA	European	Males	2018	11734354	7916	NA	NA	Continuous	Psychiatric / neurological	Elliott LT	30305740	NA	NA	NA	NA
ukb-b-16576	Dried fruit intake	MRC-IEU	European	Males and Females	2018	9851867	421764	NA	NA	Categorical Ordered	NA	Ben Elsworth	NA	NA	SD	NA	1319: Output from GWAS pipeline using Phesant derived variables from UKBiobank
prot-a-1743	Leukocyte immunoglobulin-like receptor subfamily B member 2	NA	European	Males and Females	2018	10534735	3301	NA	NA	Immune system	Protein	Sun BB	29875488	NA	NA	NA	NA
ukb-b-10847	Operative procedures - secondary OPCS: Y53.5 Approach to organ under image intensifier	MRC-IEU	European	Males and Females	2018	9851867	463010	4217	458793	Binary	NA	Ben Elsworth	NA	NA	SD	NA	41210#Y535: Output from GWAS pipeline using Phesant derived variables from UKBiobank
prot-a-104	Acidic leucine-rich nuclear phosphoprotein 32 family member A	NA	European	Males and Females	2018	10534735	3301	NA	NA	Immune system	Protein	Sun BB	29875488	NA	NA	NA	NA
ebi-a-GCST90014288	DNA methylation GrimAge acceleration	NA	European	NA	2021	7544493	34467	NA	NA	NA	NA	McCartney DL	34187551	NA	NA	NA	NA
ubm-a-245	IDP dMRI TBSS MD Pontine crossing tract	NA	European	Males	2018	11734354	7532	NA	NA	Continuous	Psychiatric / neurological	Elliott LT	30305740	NA	NA	NA	NA
met-a-568	X-12040	NA	European	Males and Females	2014	2538751	559	NA	NA	Metabolites	Unknown metabolite	Shin	24816252	NA	log10 units	0.230536	NA
prot-a-421	Antigen-presenting glycoprotein CD1d	NA	European	Males and Females	2018	10534735	3301	NA	NA	Immune system	Protein	Sun BB	29875488	NA	NA	NA	NA
prot-a-1550	Inosine-5'-monophosphate dehydrogenase 2	NA	European	Males and Females	2018	10534735	3301	NA	NA	Immune system	Protein	Sun BB	29875488	NA	NA	NA	NA
ubm-a-942	NODEamps100 0051	NA	European	Males	2018	11734354	7916	NA	NA	Continuous	Psychiatric / neurological	Elliott LT	30305740	NA	NA	NA	NA
ukb-d-K42	Diagnoses - main ICD10: K42 Umbilical hernia	NA	European	Males and Females	2018	10914854	361194	2528	358666	Binary	NA	Neale lab	NA	NA	NA	NA	NA
ubm-a-1433	NET100 0277	NA	European	Males	2018	11734354	7916	NA	NA	Continuous	Psychiatric / neurological	Elliott LT	30305740	NA	NA	NA	NA
ubm-a-1149	NET25 0203	NA	European	Males	2018	11734354	7916	NA	NA	Continuous	Psychiatric / neurological	Elliott LT	30305740	NA	NA	NA	NA
ubm-a-2845	DKTatlas rh rostralmiddlefrontal area	NA	European	Males	2018	11734354	8411	NA	NA	Continuous	Psychiatric / neurological	Elliott LT	30305740	NA	NA	NA	NA
ebi-a-GCST90010172	Superoxide dismutase [Mn],mitochondrial levels	NA	European	NA	2020	18166693	1301	NA	NA	NA	NA	Gilly A	33303764	NA	NA	NA	NA
ieu-b-4823	Age at menopause	Within family GWAS consortium	European	Males and Females	2022	NA	4476	NA	NA	NA	NA	Howe LJ	NA	EFO:0004704	NA	NA	Sibling estimate
ubm-a-2552	NET100 1396	NA	European	Males	2018	11734354	7916	NA	NA	Continuous	Psychiatric / neurological	Elliott LT	30305740	NA	NA	NA	NA
prot-a-1433	Interferon gamma receptor 2	NA	European	Males and Females	2018	10534735	3301	NA	NA	Immune system	Protein	Sun BB	29875488	NA	NA	NA	NA
ebi-a-GCST90016913	Gut microbiota abundance (class Clostridia id.1859)	NA	European	NA	2021	5729268	14306	NA	NA	NA	NA	Kurilshikov A	33462485	NA	NA	NA	NA
finn-b-CD2_INSITU_CERVIX_UTERI_ENDOCERVIX	Carcinoma in situ of cervix uteri, endocervix	NA	European	Males and Females	2021	16379784	NA	129	123450	Binary	NA	NA	NA	NA	NA	NA	CD2_INSITU_CERVIX_UTERI_ENDOCERVIX
ukb-d-M13_ARTHROSIS_OTH	Other arthrosis	NA	European	Males and Females	2018	12098840	361194	5168	356026	Binary	NA	Neale lab	NA	NA	NA	NA	NA
finn-b-K11_IBS	Irritable bowel syndrome	NA	European	Males and Females	2021	16380376	NA	4605	182423	Binary	NA	NA	NA	NA	NA	NA	K11_IBS
prot-a-2112	5'(3')-deoxyribonucleotidase, cytosolic type	NA	European	Males and Females	2018	10534735	3301	NA	NA	Immune system	Protein	Sun BB	29875488	NA	NA	NA	NA
ubm-a-2361	NET100 1205	NA	European	Males	2018	11734354	7916	NA	NA	Continuous	Psychiatric / neurological	Elliott LT	30305740	NA	NA	NA	NA
finn-b-CD2_BENIGN_ASCENDING_COLON_EXALLC	Benign neoplasm: Ascending colon (all cancers excluded)	NA	European	Males and Females	2021	16380337	NA	1273	179970	Binary	NA	NA	NA	NA	NA	NA	CD2_BENIGN_ASCENDING_COLON_EXALLC
prot-a-2097	Neuregulin-4	NA	European	Males and Females	2018	10534735	3301	NA	NA	Immune system	Protein	Sun BB	29875488	NA	NA	NA	NA
ukb-b-14429	Diagnoses - secondary ICD10: K57.9 Diverticular disease of intestine, part unspecified, without perforation or abscess	MRC-IEU	European	Males and Females	2018	9851867	463010	2622	460388	Binary	NA	Ben Elsworth	NA	NA	SD	NA	41204#K579: Output from GWAS pipeline using Phesant derived variables from UKBiobank
ukb-d-20429	Easily tired during worst period of anxiety	NA	European	Males and Females	2018	13541412	34121	24544	9577	Binary	NA	Neale lab	NA	NA	NA	NA	NA
finn-b-ST19_SUPERF_INJURY_HIP_THIGH	Superficial injury of hip and thigh	NA	European	Males and Females	2021	16380451	NA	1801	211460	Binary	NA	NA	NA	NA	NA	NA	ST19_SUPERF_INJURY_HIP_THIGH
ukb-d-OTHER_ILD_CVD_COMORB	Other ILD-related CVD-co-morbidities	NA	European	Males and Females	2018	10837503	361194	2507	358687	Binary	NA	Neale lab	NA	NA	NA	NA	NA
met-b-234	CD4mem:%preTh17 (3)	NA	European	Females	2015	1629231	497	NA	NA	Immune system	Immune cell subset frequency	Roederer	25772697	NA	%	1.00264	Female twins
ukb-b-16024	Diagnoses - secondary ICD10: Z51.0 Radiotherapy session	MRC-IEU	European	Males and Females	2018	9851867	463010	1942	461068	Binary	NA	Ben Elsworth	NA	NA	SD	NA	41204#Z510: Output from GWAS pipeline using Phesant derived variables from UKBiobank
ukb-a-186	Treatment/medication code: omacor 1g capsule	Neale Lab	European	Males and Females	2017	10894596	337159	413	336746	NA	NA	Neale	NA	NA	SD	NA	NA
ukb-a-579	Diagnoses - main ICD10: O75 Other complications of labour and delivery not elsewhere classified	Neale Lab	European	Males and Females	2017	10894596	337199	181	337018	NA	NA	Neale	NA	NA	SD	NA	NA
ubm-a-653	IDP dMRI ProbtrackX FA unc l	NA	European	Males	2018	11734354	7532	NA	NA	Continuous	Psychiatric / neurological	Elliott LT	30305740	NA	NA	NA	NA
ukb-b-14147	Risk taking	MRC-IEU	European	Males and Females	2018	9851867	446279	117515	328764	Binary	NA	Ben Elsworth	NA	NA	SD	NA	2040: Output from GWAS pipeline using Phesant derived variables from UKBiobank
prot-c-3281_19_1	ANGL3	NA	European	Males and Females	2019	501428	NA	NA	NA	Continuous	NA	Suhre K	28240269	EFO_0007937	NA	NA	name=Angiopoietin-related protein 3; chr=1; start=62597487; end=62606159; entrez=27329; uniprot=Q9Y5C1
ukb-b-7280	Non-cancer illness code, self-reported: emphysema/chronic bronchitis	MRC-IEU	European	Males and Females	2018	9851867	462933	6417	456516	Binary	NA	Ben Elsworth	NA	NA	SD	NA	20002#1113: Output from GWAS pipeline using Phesant derived variables from UKBiobank
ubm-a-3003	a2009s lh S central thickness	NA	European	Males	2018	11734354	8411	NA	NA	Continuous	Psychiatric / neurological	Elliott LT	30305740	NA	NA	NA	NA
prot-c-4978_54_2	DBNL	NA	European	Males and Females	2019	501428	NA	NA	NA	Continuous	NA	Suhre K	28240269	EFO_0007937	NA	NA	name=Drebrin-like protein; chr=7; start=44044640; end=44069456; entrez=28988; uniprot=Q9UJU6
ebi-a-GCST90001404	Plasma Blast-Plasma Cell %B cell	NA	European	NA	2020	15049172	3658	NA	NA	NA	NA	Orr<U+00F9> V	32929287	NA	NA	NA	NA
prot-c-5088_175_3	IL-23 R	NA	European	Males and Females	2019	501428	NA	NA	NA	Continuous	NA	Suhre K	28240269	EFO_0007937	NA	NA	name=Interleukin-23 receptor; chr=1; start=67166400; end=67259979; entrez=149233; uniprot=Q5VWK5
prot-a-2957	Tissue factor pathway inhibitor	NA	European	Males and Females	2018	10534735	3301	NA	NA	Immune system	Protein	Sun BB	29875488	NA	NA	NA	NA
ubm-a-1947	NET100 0791	NA	European	Males	2018	11734354	7916	NA	NA	Continuous	Psychiatric / neurological	Elliott LT	30305740	NA	NA	NA	NA
finn-b-ST19_INJURY_NERVES_SHOUL_UPPER_ARM_LEVEL	Injury of nerves at shoulder and upper arm level	NA	European	Males and Females	2021	16380431	NA	129	202866	Binary	NA	NA	NA	NA	NA	NA	ST19_INJURY_NERVES_SHOUL_UPPER_ARM_LEVEL
finn-b-O15_OBSTET_TRAUMA_OTHER	Other obstetric trauma	NA	European	Males and Females	2021	16379174	NA	677	98626	Binary	NA	NA	NA	NA	NA	NA	O15_OBSTET_TRAUMA_OTHER
ukb-b-17243	Non-cancer illness code, self-reported: anxiety/panic attacks	MRC-IEU	European	Males and Females	2018	9851867	462933	6410	456523	Binary	NA	Ben Elsworth	NA	NA	SD	NA	20002#1287: Output from GWAS pipeline using Phesant derived variables from UKBiobank
prot-a-2452	Poly(U)-binding-splicing factor PUF60	NA	European	Males and Females	2018	10534735	3301	NA	NA	Immune system	Protein	Sun BB	29875488	NA	NA	NA	NA
prot-a-360	Protein CASC4	NA	European	Males and Females	2018	10534735	3301	NA	NA	Immune system	Protein	Sun BB	29875488	NA	NA	NA	NA
ukb-b-15418	Duration screen displayed	MRC-IEU	European	Males and Females	2018	9851867	152605	NA	NA	Continuous	NA	Ben Elsworth	NA	NA	SD	NA	4290: Output from GWAS pipeline using Phesant derived variables from UKBiobank
ebi-a-GCST90016960	Gut microbiota abundance (genus Adlercreutzia id.812)	NA	European	NA	2021	5437332	14306	NA	NA	NA	NA	Kurilshikov A	33462485	NA	NA	NA	NA
met-a-541	X-11787	NA	European	Males and Females	2014	2545629	7811	NA	NA	Metabolites	Unknown metabolite	Shin	24816252	NA	log10 units	0.0808479	NA
prot-a-1306	3-hydroxyanthranilate 3,4-dioxygenase	NA	European	Males and Females	2018	10534735	3301	NA	NA	Immune system	Protein	Sun BB	29875488	NA	NA	NA	NA
finn-b-K11_CONSTIPATION	Constipation	NA	European	Males and Females	2021	16380466	NA	17246	201546	Binary	NA	NA	NA	NA	NA	NA	K11_CONSTIPATION
prot-c-4867_15_2	VEGF121	NA	European	Males and Females	2019	501428	NA	NA	NA	Continuous	NA	Suhre K	28240269	EFO_0007937	NA	NA	name=Vascular endothelial growth factor A, isoform 121; chr=6; start=43770184; end=43786487; entrez=7422; uniprot=P15692
finn-b-Q17_CONGEN_MALFO_TRACHEA_BRONCHUS	Congenital malformations of trachea and bronchus	NA	European	Males and Females	2021	16380466	NA	105	218587	Binary	NA	NA	NA	NA	NA	NA	Q17_CONGEN_MALFO_TRACHEA_BRONCHUS
prot-c-2858_29_2	Hat1	NA	European	Males and Females	2019	501428	NA	NA	NA	Continuous	NA	Suhre K	28240269	EFO_0007937	NA	NA	name=Histone acetyltransferase type B catalytic subunit; chr=2; start=171922448; end=171983682; entrez=8520; uniprot=O14929
prot-a-159	AT-rich interactive domain-containing protein 3A	NA	European	Males and Females	2018	10534735	3301	NA	NA	Immune system	Protein	Sun BB	29875488	NA	NA	NA	NA
prot-a-2146	Oxidized low-density lipoprotein receptor 1	NA	European	Males and Females	2018	10534735	3301	NA	NA	Immune system	Protein	Sun BB	29875488	NA	NA	NA	NA
ubm-a-1330	NET100 0174	NA	European	Males	2018	11734354	7916	NA	NA	Continuous	Psychiatric / neurological	Elliott LT	30305740	NA	NA	NA	NA
met-a-710	2-hydroxypalmitate	NA	European	Males and Females	2014	2545650	7797	NA	NA	Metabolites	Lipid	Shin	24816252	NA	log10 units	0.113273	NA
ebi-a-GCST90011352	O_Erysipelotrichales abundance	NA	European	NA	2021	5440786	8956	NA	NA	NA	NA	R<U+00FC>hlemann MC	33462482	NA	NA	NA	NA
finn-b-E4_THYROIDITSUBAC	Subacute thyroiditis	NA	European	Males and Females	2021	16380373	NA	418	187684	Binary	NA	NA	NA	NA	NA	NA	E4_THYROIDITSUBAC
finn-b-H7_VITRBODYGLOBE	Disorders of vitreous body	NA	European	Males and Females	2021	16380466	NA	6782	211720	Binary	NA	NA	NA	NA	NA	NA	H7_VITRBODYGLOBE
ebi-a-GCST000755	HDL cholesterol	NA	European	NA	2010	2634374	99900	NA	NA	NA	NA	Teslovich TM	20686565	NA	NA	NA	NA
ubm-a-2914	a2009s rh S orbital lateral area	NA	European	Males	2018	11734354	8411	NA	NA	Continuous	Psychiatric / neurological	Elliott LT	30305740	NA	NA	NA	NA
met-d-L_HDL_C_pct	Cholesterol to total lipids ratio in large HDL	NA	European	Males and Females	2020	12321875	115078	NA	NA	Continuous	NA	Borges CM	NA	NA	NA	NA	NA
ukb-d-2654_7	Non-butter spread type details: Polyunsaturated/sunflower oil based spread (eg: Flora)	NA	European	Males and Females	2018	13579655	190094	64325	125769	Binary	NA	Neale lab	NA	NA	NA	NA	NA
finn-b-L12_SEBORRKERAT	Seborrhoeic keratosis	NA	European	Males and Females	2021	16380450	NA	2434	207482	Binary	NA	NA	NA	NA	NA	NA	L12_SEBORRKERAT
met-c-855	Omega-3 fatty acids	NA	European	Males and Females	2016	11401623	13544	NA	NA	Metabolites	Fatty acid	Kettunen	27005778	NA	SD	NA	NA
prot-a-2659	Protein SEC13 homolog	NA	European	Males and Females	2018	10534735	3301	NA	NA	Immune system	Protein	Sun BB	29875488	NA	NA	NA	NA
ubm-a-1371	NET100 0215	NA	European	Males	2018	11734354	7916	NA	NA	Continuous	Psychiatric / neurological	Elliott LT	30305740	NA	NA	NA	NA
ukb-b-2482	Years since last cervical smear test	MRC-IEU	European	Males and Females	2018	9851867	192526	NA	NA	Categorical Ordered	NA	Ben Elsworth	NA	NA	SD	NA	2704: Output from GWAS pipeline using Phesant derived variables from UKBiobank
ubm-a-425	IDP dMRI TBSS L2 Cingulum hippocampus L	NA	European	Males	2018	11734354	7532	NA	NA	Continuous	Psychiatric / neurological	Elliott LT	30305740	NA	NA	NA	NA
ubm-a-1994	NET100 0838	NA	European	Males	2018	11734354	7916	NA	NA	Continuous	Psychiatric / neurological	Elliott LT	30305740	NA	NA	NA	NA
ubm-a-2338	NET100 1182	NA	European	Males	2018	11734354	7916	NA	NA	Continuous	Psychiatric / neurological	Elliott LT	30305740	NA	NA	NA	NA
finn-b-RHEUMA_ENDPOINTS	Finngen Rheumatological endpoints	NA	European	Males and Females	2021	16380466	NA	45958	172834	Binary	NA	NA	NA	NA	NA	NA	RHEUMA_ENDPOINTS
finn-b-E4_THYTOXGOITMULT	Thyrotoxicosis with toxic multinodular goitre	NA	European	Males and Females	2021	16380459	NA	801	214650	Binary	NA	NA	NA	NA	NA	NA	E4_THYTOXGOITMULT
ubm-a-2596	NET100 1440	NA	European	Males	2018	11734354	7916	NA	NA	Continuous	Psychiatric / neurological	Elliott LT	30305740	NA	NA	NA	NA
ukb-b-17527	Operative procedures - secondary OPCS: V55.1 One level of spine	MRC-IEU	European	Males and Females	2018	9851867	463010	2685	460325	Binary	NA	Ben Elsworth	NA	NA	SD	NA	41210#V551: Output from GWAS pipeline using Phesant derived variables from UKBiobank
ubm-a-1491	NET100 0335	NA	European	Males	2018	11734354	7916	NA	NA	Continuous	Psychiatric / neurological	Elliott LT	30305740	NA	NA	NA	NA
ubm-a-606	IDP dMRI TBSS ISOVF Posterior corona radiata R	NA	European	Males	2018	11734354	7532	NA	NA	Continuous	Psychiatric / neurological	Elliott LT	30305740	NA	NA	NA	NA
ubm-a-1212	NET100 0056	NA	European	Males	2018	11734354	7916	NA	NA	Continuous	Psychiatric / neurological	Elliott LT	30305740	NA	NA	NA	NA
ubm-a-394	IDP dMRI TBSS L2 Corticospinal tract R	NA	European	Males	2018	11734354	7532	NA	NA	Continuous	Psychiatric / neurological	Elliott LT	30305740	NA	NA	NA	NA
ubm-a-2362	NET100 1206	NA	European	Males	2018	11734354	7916	NA	NA	Continuous	Psychiatric / neurological	Elliott LT	30305740	NA	NA	NA	NA
ubm-a-2083	NET100 0927	NA	European	Males	2018	11734354	7916	NA	NA	Continuous	Psychiatric / neurological	Elliott LT	30305740	NA	NA	NA	NA
ebi-a-GCST90011330	G_Faecalibacterium abundance	NA	European	NA	2021	5440975	8956	NA	NA	NA	NA	R<U+00FC>hlemann MC	33462482	NA	NA	NA	NA
prot-a-2014	Natural cytotoxicity triggering receptor 1	NA	European	Males and Females	2018	10534735	3301	NA	NA	Immune system	Protein	Sun BB	29875488	NA	NA	NA	NA
ukb-b-9130	Pain type(s) experienced in last month: None of the above	MRC-IEU	European	Males and Females	2018	9851867	461857	184616	277241	Binary	NA	Ben Elsworth	NA	NA	SD	NA	6159#100: Output from GWAS pipeline using Phesant derived variables from UKBiobank
ubm-a-1266	NET100 0110	NA	European	Males	2018	11734354	7916	NA	NA	Continuous	Psychiatric / neurological	Elliott LT	30305740	NA	NA	NA	NA
finn-b-RX_CODEINE_TRAMADOL	Codeine or tramadol medication	NA	European	Males and Females	2021	16380466	NA	28511	190281	Binary	NA	NA	NA	NA	NA	NA	RX_CODEINE_TRAMADOL
finn-b-K11_HERING	Inguinal hernia	NA	European	Males and Females	2021	16380436	NA	17096	190557	Binary	NA	NA	NA	NA	NA	NA	K11_HERING
ubm-a-2312	NET100 1156	NA	European	Males	2018	11734354	7916	NA	NA	Continuous	Psychiatric / neurological	Elliott LT	30305740	NA	NA	NA	NA
ebi-a-GCST90001392	IgD+ CD38+ B cell Absolute Count	NA	European	NA	2020	15048937	3656	NA	NA	NA	NA	Orr<U+00F9> V	32929287	NA	NA	NA	NA
ukb-b-1974	Treatment/medication code: felodipine	MRC-IEU	European	Males and Females	2018	9851867	462933	3872	459061	Binary	NA	Ben Elsworth	NA	NA	SD	NA	20003#1140888646: Output from GWAS pipeline using Phesant derived variables from UKBiobank
prot-a-1814	Lysozyme g-like protein 1	NA	European	Males and Females	2018	10534735	3301	NA	NA	Immune system	Protein	Sun BB	29875488	NA	NA	NA	NA
ebi-a-GCST90012003	Proto-oncogene tyrosine-protein kinase Src levels	NA	European	NA	2020	13102363	21758	NA	NA	NA	NA	Folkersen L	33067605	NA	NA	NA	NA
ukb-b-7589	PCT responsible for patient data: OLDHAM PCT	MRC-IEU	European	Males and Females	2018	9851867	463010	1742	461268	Binary	NA	Ben Elsworth	NA	NA	SD	NA	41229#5J5: Output from GWAS pipeline using Phesant derived variables from UKBiobank
ukb-b-5232	Olives intake	MRC-IEU	European	Males and Females	2018	9851867	64949	NA	NA	Categorical Ordered	NA	Ben Elsworth	NA	NA	SD	NA	102490: Output from GWAS pipeline using Phesant derived variables from UKBiobank
prot-a-2367	cAMP-dependent protein kinase catalytic subunit alpha	NA	European	Males and Females	2018	10534735	3301	NA	NA	Immune system	Protein	Sun BB	29875488	NA	NA	NA	NA
ukb-b-1604	Side salad intake	MRC-IEU	European	Males and Females	2018	9851867	64949	NA	NA	Categorical Ordered	NA	Ben Elsworth	NA	NA	SD	NA	104090: Output from GWAS pipeline using Phesant derived variables from UKBiobank
ubm-a-2165	NET100 1009	NA	European	Males	2018	11734354	7916	NA	NA	Continuous	Psychiatric / neurological	Elliott LT	30305740	NA	NA	NA	NA
ubm-a-1348	NET100 0192	NA	European	Males	2018	11734354	7916	NA	NA	Continuous	Psychiatric / neurological	Elliott LT	30305740	NA	NA	NA	NA
ebi-a-GCST90011567	OTU97_12 (Bacteroides) prevalence	NA	European	NA	2021	5438111	8956	NA	NA	NA	NA	R<U+00FC>hlemann MC	33462482	NA	NA	NA	NA
finn-b-R18_ABNORMAL_SERUM_ENZYME_LEVELS	Abnormal serum enzyme levels	NA	European	Males and Females	2021	16380464	NA	4022	212004	Binary	NA	NA	NA	NA	NA	NA	R18_ABNORMAL_SERUM_ENZYME_LEVELS
prot-c-3825_18_2	MK08	NA	European	Males and Females	2019	501428	NA	NA	NA	Continuous	NA	Suhre K	28240269	EFO_0007937	NA	NA	name=Mitogen-activated protein kinase 8; chr=10; start=48306639; end=48439360; entrez=5599; uniprot=P45983
prot-a-832	Delta-like protein 4	NA	European	Males and Females	2018	10534735	3301	NA	NA	Immune system	Protein	Sun BB	29875488	NA	NA	NA	NA
ebi-a-GCST90012033	Matrix metalloproteinase-1 levels	NA	European	NA	2020	12705782	21758	NA	NA	NA	NA	Folkersen L	33067605	NA	NA	NA	NA
ebi-a-GCST90017021	Gut microbiota abundance (genus Lachnospiraceae FCS020 group id.11314)	NA	European	NA	2021	5547835	14306	NA	NA	NA	NA	Kurilshikov A	33462485	NA	NA	NA	NA
finn-b-ST19_SUPERF_INJURI_INVOLVI_MULTIPLE_BODY_REGIONS	Superficial injuries involving multiple body regions	NA	European	Males and Females	2021	16380466	NA	303	218350	Binary	NA	NA	NA	NA	NA	NA	ST19_SUPERF_INJURI_INVOLVI_MULTIPLE_BODY_REGIONS
ubm-a-3050	DKTatlas rh parstriangularis thickness	NA	European	Males	2018	11734354	8411	NA	NA	Continuous	Psychiatric / neurological	Elliott LT	30305740	NA	NA	NA	NA
prot-b-57	C-X-C motif chemokine ligand 16	NA	European	Males and Females	2018	5270646	3394	NA	NA	Immune system	Protein	Folkersen L	28369058	NA	NA	NA	NA
ubm-a-3031	a2009s lh S temporal sup thickness	NA	European	Males	2018	11734354	8411	NA	NA	Continuous	Psychiatric / neurological	Elliott LT	30305740	NA	NA	NA	NA
finn-b-ST19_FRACT_SHOUL_UPPER_ARM	Fracture of shoulder and upper arm	NA	European	Males and Females	2021	16380446	NA	5824	202866	Binary	NA	NA	NA	NA	NA	NA	ST19_FRACT_SHOUL_UPPER_ARM
ebi-a-GCST90011653	OTU99_30 (Parasutterella) prevalence	NA	European	NA	2021	5408519	8956	NA	NA	NA	NA	R<U+00FC>hlemann MC	33462482	NA	NA	NA	NA
prot-a-1603	Junctophilin-3	NA	European	Males and Females	2018	10534735	3301	NA	NA	Immune system	Protein	Sun BB	29875488	NA	NA	NA	NA
ukb-b-374	How are people in household related to participant: Brother and/or sister	MRC-IEU	European	Males and Females	2018	9851867	459600	2511	457089	Binary	NA	Ben Elsworth	NA	NA	SD	NA	6141#3: Output from GWAS pipeline using Phesant derived variables from UKBiobank
prot-a-1675	NKG2-D type II integral membrane protein	NA	European	Males and Females	2018	10534735	3301	NA	NA	Immune system	Protein	Sun BB	29875488	NA	NA	NA	NA
ubm-a-810	IDP dMRI ProbtrackX ICVF ptr r	NA	European	Males	2018	11734354	7532	NA	NA	Continuous	Psychiatric / neurological	Elliott LT	30305740	NA	NA	NA	NA
prot-a-1884	Microfibrillar-associated protein 1	NA	European	Males and Females	2018	10534735	3301	NA	NA	Immune system	Protein	Sun BB	29875488	NA	NA	NA	NA
ebi-a-GCST90011519	TestASV_41 (Barnesiella) abundance	NA	European	NA	2021	5478752	8956	NA	NA	NA	NA	R<U+00FC>hlemann MC	33462482	NA	NA	NA	NA
ebi-a-GCST90011665	OTU99_55 (Barnesiella) prevalence	NA	European	NA	2021	5438111	8956	NA	NA	NA	NA	R<U+00FC>hlemann MC	33462482	NA	NA	NA	NA
prot-a-91	Anaphase-promoting complex subunit 7	NA	European	Males and Females	2018	10534735	3301	NA	NA	Immune system	Protein	Sun BB	29875488	NA	NA	NA	NA
ukb-d-PULM_MEDICATIO_COMORB	Medication related adverse effects (Asthma/COPD)	NA	European	Males and Females	2018	13586589	361194	21706	339488	Binary	NA	Neale lab	NA	NA	NA	NA	NA
ukb-b-13151	Operative procedures - main OPCS: W20.5 Primary open reduction of fracture of ankle and extramedullary fixation NEC	MRC-IEU	European	Males and Females	2018	9851867	463010	1307	461703	Binary	NA	Ben Elsworth	NA	NA	SD	NA	41200#W205: Output from GWAS pipeline using Phesant derived variables from UKBiobank
ukb-b-4373	Operative procedures - secondary OPCS: T85.2 Block dissection of axillary lymph nodes	MRC-IEU	European	Males and Females	2018	9851867	463010	3234	459776	Binary	NA	Ben Elsworth	NA	NA	SD	NA	41210#T852: Output from GWAS pipeline using Phesant derived variables from UKBiobank
prot-c-5093_47_3	JAG2	NA	European	Males and Females	2019	501428	NA	NA	NA	Continuous	NA	Suhre K	28240269	EFO_0007937	NA	NA	name=Protein jagged-2; chr=14; start=105140981; end=105168824; entrez=3714; uniprot=Q9Y219
met-c-919	Phenylalanine	NA	European	Males and Females	2016	12042964	22663	NA	NA	Metabolites	Amino acid	Kettunen	27005778	NA	SD	0.21	SD value comes from the original untransformed distribution of the ERF cohort
ukb-b-1480	Diagnoses - secondary ICD10: R00.2 Palpitations	MRC-IEU	European	Males and Females	2018	9851867	463010	1380	461630	Binary	NA	Ben Elsworth	NA	NA	SD	NA	41204#R002: Output from GWAS pipeline using Phesant derived variables from UKBiobank
prot-a-308	ES1 protein homolog, mitochondrial	NA	European	Males and Females	2018	10534735	3301	NA	NA	Immune system	Protein	Sun BB	29875488	NA	NA	NA	NA
ieu-a-1127	ER+ Breast cancer (Combined Oncoarray; iCOGS; GWAS meta analysis)	BCAC	European	Females	2017	10680257	175475	69501	105974	Disease	Cancer	Michailidou K	29059683	NA	log odds	NA	NA
prot-a-2813	Spermatogenesis-associated protein 20	NA	European	Males and Females	2018	10534735	3301	NA	NA	Immune system	Protein	Sun BB	29875488	NA	NA	NA	NA
ebi-a-GCST90010143	Interleukin-1 receptor-like 2 levels	NA	European	NA	2020	18166693	1301	NA	NA	NA	NA	Gilly A	33303764	NA	NA	NA	NA
ukb-d-22617_2442	Job SOC coding: Social workers	NA	European	Males and Females	2018	9978111	91149	1509	89640	Binary	NA	Neale lab	NA	NA	NA	NA	NA
prot-a-1747	Leukocyte immunoglobulin-like receptor subfamily B member 5	NA	European	Males and Females	2018	10534735	3301	NA	NA	Immune system	Protein	Sun BB	29875488	NA	NA	NA	NA
prot-a-746	Gro-beta/gamma	NA	European	Males and Females	2018	10534735	3301	NA	NA	Immune system	Protein	Sun BB	29875488	NA	NA	NA	NA
ukb-d-12338_irnt	P duration	NA	European	Males and Females	2018	13478901	10785	NA	NA	Continuous	NA	Neale lab	NA	NA	NA	NA	NA
finn-b-SEPTICHE_PNEUMONIA	Pneumonia derived septichemia (SEPTICHE_PNEUMONIA)	NA	European	Males and Females	2021	16380447	NA	470	208324	Binary	NA	NA	NA	NA	NA	NA	SEPTICHE_PNEUMONIA
ukb-d-ASTHMA_HOSPITAL1	Asthma, hospital admissions 1	NA	European	Males and Females	2018	10438296	361194	1986	359208	Binary	NA	Neale lab	NA	NA	NA	NA	NA
finn-b-CD2_BENIGN_LIVE_BILE_EXALLC	Benign neoplasm: Liver/bile ducts (all cancers excluded)	NA	European	Males and Females	2021	16380337	NA	264	180575	Binary	NA	NA	NA	NA	NA	NA	CD2_BENIGN_LIVE_BILE_EXALLC
ubm-a-1983	NET100 0827	NA	European	Males	2018	11734354	7916	NA	NA	Continuous	Psychiatric / neurological	Elliott LT	30305740	NA	NA	NA	NA
ukb-a-298	Ever had prostate specific antigen (PSA) test	Neale Lab	European	Males and Females	2017	10894596	147970	46523	101447	NA	NA	Neale	NA	NA	SD	NA	NA
ubm-a-1358	NET100 0202	NA	European	Males	2018	11734354	7916	NA	NA	Continuous	Psychiatric / neurological	Elliott LT	30305740	NA	NA	NA	NA
ubm-a-2429	NET100 1273	NA	European	Males	2018	11734354	7916	NA	NA	Continuous	Psychiatric / neurological	Elliott LT	30305740	NA	NA	NA	NA
prot-c-4923_79_1	MIS	NA	European	Males and Females	2019	501428	NA	NA	NA	Continuous	NA	Suhre K	28240269	EFO_0007937	NA	NA	name=Muellerian-inhibiting factor; chr=19; start=2249309; end=2252073; entrez=268; uniprot=P03971
finn-b-THROMBOCYTAEMIA	Essential (haemorrhagic) thrombocythaemia	NA	European	Males and Females	2021	16380466	NA	397	217902	Binary	NA	NA	NA	NA	NA	NA	THROMBOCYTAEMIA
ubm-a-652	IDP dMRI ProbtrackX FA str r	NA	European	Males	2018	11734354	7532	NA	NA	Continuous	Psychiatric / neurological	Elliott LT	30305740	NA	NA	NA	NA
ebi-a-GCST90001872	HVEM on naive CD8+ T cell	NA	European	NA	2020	13730810	1247	NA	NA	NA	NA	Orr<U+00F9> V	32929287	NA	NA	NA	NA
finn-b-O15_POLYHYDR	Polyhydramnios	NA	European	Males and Females	2021	16379375	NA	547	104247	Binary	NA	NA	NA	NA	NA	NA	O15_POLYHYDR
ukb-a-365	Pulse wave peak to peak time	Neale Lab	European	Males and Females	2017	10894596	110099	NA	NA	NA	NA	Neale	NA	NA	SD	NA	NA
ukb-a-506	Number of days/week walked 10+ minutes	Neale Lab	European	Males and Females	2017	10894596	331654	NA	NA	NA	NA	Neale	NA	NA	SD	NA	NA
met-a-397	2-hydroxystearate	NA	European	Males and Females	2014	2545671	7763	NA	NA	Metabolites	Lipid	Shin	24816252	NA	log10 units	0.122293	NA
ubm-a-341	IDP dMRI TBSS L1 Pontine crossing tract	NA	European	Males	2018	11734354	7532	NA	NA	Continuous	Psychiatric / neurological	Elliott LT	30305740	NA	NA	NA	NA
met-b-132	B Mem:%IgG	NA	European	Females	2015	1623131	497	NA	NA	Immune system	Immune cell subset frequency	Roederer	25772697	NA	%	13.6035	Female twins
finn-b-ST19_INJURI_SHOUL_UPPER_ARM	Injuries to the shoulder and upper arm	NA	European	Males and Females	2021	16380466	NA	15926	202866	Binary	NA	NA	NA	NA	NA	NA	ST19_INJURI_SHOUL_UPPER_ARM
ukb-a-356	Number of incorrect matches in round	Neale Lab	European	Males and Females	2017	10894596	336881	NA	NA	NA	NA	Neale	NA	NA	SD	NA	NA
finn-b-L12_DERMATITISNAS	Other and unspecified dermatitis (L12_DERMATITISNAS)	NA	European	Males and Females	2021	16380442	NA	10308	198740	Binary	NA	NA	NA	NA	NA	NA	L12_DERMATITISNAS
finn-b-ASTHMA_SEPTICHE_PNEUMONIA	Pneumonia derived septichemia (ASTHMA_SEPTICHE_PNEUMONIA)	NA	European	Males and Females	2021	16380447	NA	470	208324	Binary	NA	NA	NA	NA	NA	NA	ASTHMA_SEPTICHE_PNEUMONIA
finn-b-CD2_BENIGN_PANCREAS	Benign neoplasm: Pancreas	NA	European	Males and Females	2021	16380466	NA	163	218629	Binary	NA	NA	NA	NA	NA	NA	CD2_BENIGN_PANCREAS
ubm-a-2550	NET100 1394	NA	European	Males	2018	11734354	7916	NA	NA	Continuous	Psychiatric / neurological	Elliott LT	30305740	NA	NA	NA	NA
met-d-Glucose	Glucose	NA	European	Males and Females	2020	12321875	114867	NA	NA	Continuous	NA	Borges CM	NA	NA	NA	NA	NA
prot-a-358	Cysteine--tRNA ligase, cytoplasmic	NA	European	Males and Females	2018	10534735	3301	NA	NA	Immune system	Protein	Sun BB	29875488	NA	NA	NA	NA
ubm-a-2701	volume rhCerebralWhiteMatterVol	NA	European	Males	2018	11734354	8411	NA	NA	Continuous	Psychiatric / neurological	Elliott LT	30305740	NA	NA	NA	NA
ebi-a-GCST90001929	CD127 on CD28+ CD45RA+ CD8+ T cell	NA	European	NA	2020	14551148	2920	NA	NA	NA	NA	Orr<U+00F9> V	32929287	NA	NA	NA	NA
prot-a-1963	Myotubularin-related protein 1	NA	European	Males and Females	2018	10534735	3301	NA	NA	Immune system	Protein	Sun BB	29875488	NA	NA	NA	NA
prot-c-4138_25_2	IL-20	NA	European	Males and Females	2019	501428	NA	NA	NA	Continuous	NA	Suhre K	28240269	EFO_0007937	NA	NA	name=Interleukin-20; chr=1; start=206865354; end=206869223; entrez=50604; uniprot=Q9NYY1
finn-b-AB1_EARLY_SYPHILIS	Early syphilis	NA	European	Males and Females	2021	16380455	NA	165	212952	Binary	NA	NA	NA	NA	NA	NA	AB1_EARLY_SYPHILIS
finn-b-I9_SAHANEUR_EXNONE	"Aneurysms, operations, SAH" (no controls excluded)	NA	European	Males and Females	2021	16380466	NA	2127	216665	Binary	NA	NA	NA	NA	NA	NA	I9_SAHANEUR_EXNONE
prot-a-1956	Growth/differentiation factor 8	NA	European	Males and Females	2018	10534735	3301	NA	NA	Immune system	Protein	Sun BB	29875488	NA	NA	NA	NA
ukb-b-20162	Diagnoses - main ICD10: R33 Retention of urine	MRC-IEU	European	Males and Females	2018	9851867	463010	2106	460904	Binary	NA	Ben Elsworth	NA	NA	SD	NA	41202#R33: Output from GWAS pipeline using Phesant derived variables from UKBiobank
prot-c-2741_22_2	Siglec-6	NA	European	Males and Females	2019	501428	NA	NA	NA	Continuous	NA	Suhre K	28240269	EFO_0007937	NA	NA	name=Sialic acid-binding Ig-like lectin 6; chr=19; start=51519525; end=51531856; entrez=946; uniprot=O43699
ebi-a-GCST90000438	Adenosine Deaminase levels	NA	European	NA	2020	7883829	982	NA	NA	NA	NA	Hillary RF	32641083	NA	NA	NA	NA
ubm-a-2176	NET100 1020	NA	European	Males	2018	11734354	7916	NA	NA	Continuous	Psychiatric / neurological	Elliott LT	30305740	NA	NA	NA	NA
ubm-a-1673	NET100 0517	NA	European	Males	2018	11734354	7916	NA	NA	Continuous	Psychiatric / neurological	Elliott LT	30305740	NA	NA	NA	NA
ubm-a-2082	NET100 0926	NA	European	Males	2018	11734354	7916	NA	NA	Continuous	Psychiatric / neurological	Elliott LT	30305740	NA	NA	NA	NA
ukb-b-1160	Chocolate-covered raisin intake	MRC-IEU	European	Males and Females	2018	9851867	64949	NA	NA	Categorical Ordered	NA	Ben Elsworth	NA	NA	SD	NA	102300: Output from GWAS pipeline using Phesant derived variables from UKBiobank
ukb-d-I9_DISVEINLYMPH	Diseases of veins, lymphatic vessels and lymph nodes, not elsewhere classified	NA	European	Males and Females	2018	13542754	361194	11867	349327	Binary	NA	Neale lab	NA	NA	NA	NA	NA
ukb-b-15272	Ever manic/hyper for 2 days	MRC-IEU	European	Males and Females	2018	9851867	149144	8680	140464	Binary	NA	Ben Elsworth	NA	NA	SD	NA	4642: Output from GWAS pipeline using Phesant derived variables from UKBiobank
ubm-a-2161	NET100 1005	NA	European	Males	2018	11734354	7916	NA	NA	Continuous	Psychiatric / neurological	Elliott LT	30305740	NA	NA	NA	NA
ukb-b-3549	3mm strong meridian angle (left)	MRC-IEU	European	Males and Females	2018	9851867	95998	NA	NA	Continuous	NA	Ben Elsworth	NA	NA	SD	NA	5104: Output from GWAS pipeline using Phesant derived variables from UKBiobank
ukb-d-K26	Diagnoses - main ICD10: K26 Duodenal ulcer	NA	European	Males and Females	2018	9827456	361194	1291	359903	Binary	NA	Neale lab	NA	NA	NA	NA	NA
ieu-a-1131	Breast cancer (GWAS)	BCAC	European	Females	2017	10680257	32498	14910	17588	Disease	Cancer	Michailidou K	29059683	NA	log odds	NA	NA
ubm-a-1933	NET100 0777	NA	European	Males	2018	11734354	7916	NA	NA	Continuous	Psychiatric / neurological	Elliott LT	30305740	NA	NA	NA	NA
prot-c-3888_8_1	ING1	NA	European	Males and Females	2019	501428	NA	NA	NA	Continuous	NA	Suhre K	28240269	EFO_0007937	NA	NA	name=Inhibitor of growth protein 1; chr=13; start=110712736; end=110723339; entrez=3621; uniprot=Q9UK53
ebi-a-GCST90001461	Dendritic Cell Absolute Count	NA	European	NA	2020	14668928	3374	NA	NA	NA	NA	Orr<U+00F9> V	32929287	NA	NA	NA	NA
prot-c-3418_12_2	CAMK1D	NA	European	Males and Females	2019	501428	NA	NA	NA	Continuous	NA	Suhre K	28240269	EFO_0007937	NA	NA	name=Calcium/calmodulin-dependent protein kinase type 1D; chr=10; start=12349482; end=12835545; entrez=57118; uniprot=Q8IU85
ukb-d-COX_ARTHROSIS	Coxarthrosis [arthrosis of hip](FG)	NA	European	Males and Females	2018	13160539	361194	9410	351784	Binary	NA	Neale lab	NA	NA	NA	NA	NA
ieu-a-94	Body mass index	GIANT	European	Males	2013	2736876	60586	NA	NA	Risk factor	Anthropometric	Randall JC	23754948	NA	SD (kg/m^2)	4.77	NA
finn-b-D3_IMMUNEMECHANISMNAS	Other and unspecified disorders involving the immune mechanism, not elsewhere classified	NA	European	Males and Females	2021	16380454	NA	374	215712	Binary	NA	NA	NA	NA	NA	NA	D3_IMMUNEMECHANISMNAS
prot-a-797	Beta-defensin 121	NA	European	Males and Females	2018	10534735	3301	NA	NA	Immune system	Protein	Sun BB	29875488	NA	NA	NA	NA
finn-b-F5_SUBSTANCE	Mental and behavioural disorders due to psychoctive substance use	NA	European	Males and Females	2021	16380466	NA	13133	205659	Binary	NA	NA	NA	NA	NA	NA	F5_SUBSTANCE
ukb-b-6650	Treatment/medication code: adalat 5mg capsule	MRC-IEU	European	Males and Females	2018	9851867	462933	1053	461880	Binary	NA	Ben Elsworth	NA	NA	SD	NA	20003#1140861090: Output from GWAS pipeline using Phesant derived variables from UKBiobank
ukb-a-321	Ever had stillbirth spontaneous miscarriage or termination	Neale Lab	European	Males and Females	2017	10894596	178474	56172	122302	NA	NA	Neale	NA	NA	SD	NA	NA
finn-b-CD2_BENIGN_HEAMANGIOMA_LYMPHANGIOMA_EXALLC	"Haemangioma and lymphangioma, any site" (all cancers excluded)	NA	European	Males and Females	2021	16380337	NA	1243	179808	Binary	NA	NA	NA	NA	NA	NA	CD2_BENIGN_HEAMANGIOMA_LYMPHANGIOMA_EXALLC
ubm-a-2314	NET100 1158	NA	European	Males	2018	11734354	7916	NA	NA	Continuous	Psychiatric / neurological	Elliott LT	30305740	NA	NA	NA	NA
met-a-443	X-10506	NA	European	Males and Females	2014	2545397	7710	NA	NA	Metabolites	Unknown metabolite	Shin	24816252	NA	log10 units	0.126873	NA
ebi-a-GCST90001890	CD28 on CD45RA+ CD4+ T cell	NA	European	NA	2020	13468774	2920	NA	NA	NA	NA	Orr<U+00F9> V	32929287	NA	NA	NA	NA
prot-a-2115	Neurotrophin-4	NA	European	Males and Females	2018	10534735	3301	NA	NA	Immune system	Protein	Sun BB	29875488	NA	NA	NA	NA
prot-a-937	EMI domain-containing protein 1	NA	European	Males and Females	2018	10534735	3301	NA	NA	Immune system	Protein	Sun BB	29875488	NA	NA	NA	NA
ebi-a-GCST90010323	Leucine-rich repeats and immunoglobulin-like domains protein 1 levels	NA	European	NA	2020	18197903	1313	NA	NA	NA	NA	Gilly A	33303764	NA	NA	NA	NA
met-a-735	Octadecanedioate	NA	European	Males and Females	2014	2545925	7300	NA	NA	Metabolites	Lipid	Shin	24816252	NA	log10 units	0.193895	NA
met-a-602	1-eicosatrienoylglycerophosphocholine*	NA	European	Males and Females	2014	2545640	7809	NA	NA	Metabolites	Lipid	Shin	24816252	NA	log10 units	0.177489	NA
prot-a-3182	Uronyl 2-sulfotransferase	NA	European	Males and Females	2018	10534735	3301	NA	NA	Immune system	Protein	Sun BB	29875488	NA	NA	NA	NA
finn-b-N14_LUMPNASBREAST	Unspecified lump in breast	NA	European	Males and Females	2021	16379647	NA	2533	115030	Binary	NA	NA	NA	NA	NA	NA	N14_LUMPNASBREAST
ukb-b-15287	Types of spreads/sauces consumed: Brown sauce	MRC-IEU	European	Males and Females	2018	9851867	64949	1782	63167	Binary	NA	Ben Elsworth	NA	NA	SD	NA	20088#340: Output from GWAS pipeline using Phesant derived variables from UKBiobank
ubm-a-2069	NET100 0913	NA	European	Males	2018	11734354	7916	NA	NA	Continuous	Psychiatric / neurological	Elliott LT	30305740	NA	NA	NA	NA
ubm-a-2620	NET100 1464	NA	European	Males	2018	11734354	7916	NA	NA	Continuous	Psychiatric / neurological	Elliott LT	30305740	NA	NA	NA	NA
ukb-d-30040_irnt	Mean corpuscular volume	NA	European	Males and Females	2018	13586288	350473	NA	NA	Continuous	NA	Neale lab	NA	NA	NA	NA	NA
prot-a-2074	Nuclear pore complex-interacting protein family member B3	NA	European	Males and Females	2018	10534735	3301	NA	NA	Immune system	Protein	Sun BB	29875488	NA	NA	NA	NA
finn-b-H7_RETINAVASC	Retinal vascular disorders	NA	European	Males and Females	2021	16380386	NA	1642	203018	Binary	NA	NA	NA	NA	NA	NA	H7_RETINAVASC
prot-c-2431_17_3	Cathepsin G	NA	European	Males and Females	2019	501428	NA	NA	NA	Continuous	NA	Suhre K	28240269	EFO_0007937	NA	NA	name=Cathepsin G; chr=14; start=24573522; end=24576260; entrez=1511; uniprot=P08311
prot-c-3201_49_2	kallikrein 5	NA	European	Males and Females	2019	501428	NA	NA	NA	Continuous	NA	Suhre K	28240269	EFO_0007937	NA	NA	name=Kallikrein-5; chr=19; start=50943303; end=50953093; entrez=25818; uniprot=Q9Y337
met-d-VLDL_PL	Phospholipids in VLDL	NA	European	Males and Females	2020	12321875	115078	NA	NA	Continuous	NA	Borges CM	NA	NA	NA	NA	NA
ukb-a-136	Treatment/medication code: ibuprofen	Neale Lab	European	Males and Females	2017	10894596	337159	41952	295207	NA	NA	Neale	NA	NA	SD	NA	NA
prot-a-301	Complement C1q subcomponent subunit C	NA	European	Males and Females	2018	10534735	3301	NA	NA	Immune system	Protein	Sun BB	29875488	NA	NA	NA	NA
prot-b-16	C-X-C motif chemokine ligand 1	NA	European	Males and Females	2018	5270646	3394	NA	NA	Immune system	Protein	Folkersen L	28369058	NA	NA	NA	NA
ubm-a-1690	NET100 0534	NA	European	Males	2018	11734354	7916	NA	NA	Continuous	Psychiatric / neurological	Elliott LT	30305740	NA	NA	NA	NA
ukb-b-16451	Illnesses of mother: Diabetes	MRC-IEU	European	Males and Females	2018	9851867	423892	40091	383801	Binary	NA	Ben Elsworth	NA	NA	SD	NA	20110#9: Output from GWAS pipeline using Phesant derived variables from UKBiobank
prot-a-813	Desert hedgehog protein N-product	NA	European	Males and Females	2018	10534735	3301	NA	NA	Immune system	Protein	Sun BB	29875488	NA	NA	NA	NA
ebi-a-GCST90011418	OTU97_97 (Clostridiales) abundance	NA	European	NA	2021	5492040	8956	NA	NA	NA	NA	R<U+00FC>hlemann MC	33462482	NA	NA	NA	NA
ebi-a-GCST90001507	CD25++ CD45RA+ CD4 not regulatory T cell Absolute Count	NA	European	NA	2020	15131843	3405	NA	NA	NA	NA	Orr<U+00F9> V	32929287	NA	NA	NA	NA
met-a-668	Laurylcarnitine	NA	European	Males and Females	2014	2545632	5170	NA	NA	Metabolites	Lipid	Shin	24816252	NA	log10 units	0.228909	NA
met-d-XXL_VLDL_FC_pct	Free cholesterol to total lipids ratio in chylomicrons and extremely large VLDL	NA	European	Males and Females	2020	12321875	111631	NA	NA	Continuous	NA	Borges CM	NA	NA	NA	NA	NA
ebi-a-GCST006952	Feeling tense	NA	European	NA	2018	10824652	371318	NA	NA	NA	NA	Nagel M	29500382	NA	NA	NA	NA
finn-b-Z21_PERSONAL_HISTORY_MALIG_NEOPLASM	Personal history of malignant neoplasm	NA	European	Males and Females	2021	16380402	NA	304	195047	Binary	NA	NA	NA	NA	NA	NA	Z21_PERSONAL_HISTORY_MALIG_NEOPLASM
met-d-HDL_FC	Free cholesterol in HDL	NA	European	Males and Females	2020	12321875	115078	NA	NA	Continuous	NA	Borges CM	NA	NA	NA	NA	NA
finn-b-N14_SALPHOOPH	Salphingitis and oophoritis	NA	European	Males and Females	2021	16379551	NA	3292	111858	Binary	NA	NA	NA	NA	NA	NA	N14_SALPHOOPH
ukb-d-N48	Diagnoses - main ICD10: N48 Other disorders of penis	NA	European	Males and Females	2018	9784099	361194	1317	359877	Binary	NA	Neale lab	NA	NA	NA	NA	NA
ukb-d-5855_1	Which eye(s) affected by astigmatism: Right eye	NA	European	Males and Females	2018	9914175	9749	1451	8298	Binary	NA	Neale lab	NA	NA	NA	NA	NA
ubm-a-2505	NET100 1349	NA	European	Males	2018	11734354	7916	NA	NA	Continuous	Psychiatric / neurological	Elliott LT	30305740	NA	NA	NA	NA
finn-b-L12_INFECT_SKIN_NAS	Other and unspecified local infections of skin and subcutaneous tissue	NA	European	Males and Females	2021	16380456	NA	1150	208449	Binary	NA	NA	NA	NA	NA	NA	L12_INFECT_SKIN_NAS
ubm-a-1589	NET100 0433	NA	European	Males	2018	11734354	7916	NA	NA	Continuous	Psychiatric / neurological	Elliott LT	30305740	NA	NA	NA	NA
finn-b-M13_MULTIFIBRO	Multifocal fibrosclerosis	NA	European	Males and Females	2021	16380450	NA	85	213145	Binary	NA	NA	NA	NA	NA	NA	M13_MULTIFIBRO
ukb-b-3983	Diagnoses - main ICD10: I25.9 Chronic ischaemic heart disease, unspecified	MRC-IEU	European	Males and Females	2018	9851867	463010	1195	461815	Binary	NA	Ben Elsworth	NA	NA	SD	NA	41202#I259: Output from GWAS pipeline using Phesant derived variables from UKBiobank
finn-b-F5_BIPO	Bipolar affective disorders	NA	European	Males and Females	2021	16380409	NA	4501	192220	Binary	NA	NA	NA	NA	NA	NA	F5_BIPO
prot-a-1871	Midkine	NA	European	Males and Females	2018	10534735	3301	NA	NA	Immune system	Protein	Sun BB	29875488	NA	NA	NA	NA
finn-b-O15_MATERN_CARE_PELVIC_ABNORM	Maternal care for known or suspected abnormality of pelvic organs	NA	European	Males and Females	2021	16379473	NA	3878	104247	Binary	NA	NA	NA	NA	NA	NA	O15_MATERN_CARE_PELVIC_ABNORM
prot-a-2541	Rho-related GTP-binding protein RhoG	NA	European	Males and Females	2018	10534735	3301	NA	NA	Immune system	Protein	Sun BB	29875488	NA	NA	NA	NA
finn-b-RX_CROHN_2NDLINE	Second line medication for Crohns disease	NA	European	Males and Females	2021	16380466	NA	9669	209123	Binary	NA	NA	NA	NA	NA	NA	RX_CROHN_2NDLINE
ubm-a-1805	NET100 0649	NA	European	Males	2018	11734354	7916	NA	NA	Continuous	Psychiatric / neurological	Elliott LT	30305740	NA	NA	NA	NA
prot-a-433	CMRF35-like molecule 6	NA	European	Males and Females	2018	10534735	3301	NA	NA	Immune system	Protein	Sun BB	29875488	NA	NA	NA	NA
ukb-b-5425	Treatment/medication code: chondroitin product	MRC-IEU	European	Males and Females	2018	9851867	462933	5876	457057	Binary	NA	Ben Elsworth	NA	NA	SD	NA	20003#1187: Output from GWAS pipeline using Phesant derived variables from UKBiobank
ebi-a-GCST006906	Stroke	NA	European	NA	2018	8211693	446696	40585	406111	NA	NA	Malik R	29531354	NA	logOR	NA	NA
met-d-XL_VLDL_PL	Phospholipids in very large VLDL	NA	European	Males and Females	2020	12321875	115078	NA	NA	Continuous	NA	Borges CM	NA	NA	NA	NA	NA
ukb-b-11261	Diagnoses - main ICD10: I84.9 Unspecified haemorrhoids without complication	MRC-IEU	European	Males and Females	2018	9851867	463010	6198	456812	Binary	NA	Ben Elsworth	NA	NA	SD	NA	41202#I849: Output from GWAS pipeline using Phesant derived variables from UKBiobank
ubm-a-580	IDP dMRI TBSS ISOVF Middle cerebellar peduncle	NA	European	Males	2018	11734354	7532	NA	NA	Continuous	Psychiatric / neurological	Elliott LT	30305740	NA	NA	NA	NA
ukb-b-9294	Operative procedures - secondary OPCS: K63.6 Coronary arteriography NEC	MRC-IEU	European	Males and Females	2018	9851867	463010	2443	460567	Binary	NA	Ben Elsworth	NA	NA	SD	NA	41210#K636: Output from GWAS pipeline using Phesant derived variables from UKBiobank
prot-a-2913	Synaptotagmin-2	NA	European	Males and Females	2018	10534735	3301	NA	NA	Immune system	Protein	Sun BB	29875488	NA	NA	NA	NA
finn-b-DM_POLYNEURO	Diabetic polyneuropathy	NA	European	Males and Females	2021	16380465	NA	358	217377	Binary	NA	NA	NA	NA	NA	NA	DM_POLYNEURO
prot-a-2031	Protein kinase C-binding protein NELL2	NA	European	Males and Females	2018	10534735	3301	NA	NA	Immune system	Protein	Sun BB	29875488	NA	NA	NA	NA
ubm-a-1014	NET25 0068	NA	European	Males	2018	11734354	7916	NA	NA	Continuous	Psychiatric / neurological	Elliott LT	30305740	NA	NA	NA	NA
finn-b-CD2_BENIGN_TONSIL	Benign neoplasm: Tonsil	NA	European	Males and Females	2021	16380466	NA	121	218671	Binary	NA	NA	NA	NA	NA	NA	CD2_BENIGN_TONSIL
ukb-a-220	Illnesses of siblings: Severe depression	Neale Lab	European	Males and Females	2017	10894596	259921	18239	242505	NA	NA	Neale	NA	NA	SD	NA	NA
ebi-a-GCST90010141	Interleukin-18 levels	NA	European	NA	2020	18166693	1301	NA	NA	NA	NA	Gilly A	33303764	NA	NA	NA	NA
ebi-a-GCST90001424	IgD+ B cell %Lymphocyte	NA	European	NA	2020	15048951	3657	NA	NA	NA	NA	Orr<U+00F9> V	32929287	NA	NA	NA	NA
met-a-741	X-14977--vanillin	NA	European	Males and Females	2014	2545167	1789	NA	NA	Metabolites	Xenobiotics	Shin	24816252	NA	log10 units	0.13408	NA
prot-c-2764_20_2	FGF9	NA	European	Males and Females	2019	501428	NA	NA	NA	Continuous	NA	Suhre K	28240269	EFO_0007937	NA	NA	name=Fibroblast growth factor 9; chr=13; start=21671383; end=21704498; entrez=2254; uniprot=P31371
finn-b-L12_LOCALSCLERODERMA	Localized scleroderma [morphea]	NA	European	Males and Females	2021	16380444	NA	180	207482	Binary	NA	NA	NA	NA	NA	NA	L12_LOCALSCLERODERMA
prot-c-5035_7_1	TS	NA	European	Males and Females	2019	501428	NA	NA	NA	Continuous	NA	Suhre K	28240269	EFO_0007937	NA	NA	name=Thymidylate synthase; chr=18; start=657604; end=673578; entrez=7298; uniprot=P04818
prot-a-2196	Protocadherin-15	NA	European	Males and Females	2018	10534735	3301	NA	NA	Immune system	Protein	Sun BB	29875488	NA	NA	NA	NA
ukb-d-M13_DUPUTRYEN	Palmar fascial fibromatosis [Dupuytren]	NA	European	Males and Females	2018	11118624	361194	2948	358246	Binary	NA	Neale lab	NA	NA	NA	NA	NA
prot-a-309	Uncharacterized protein C22orf15	NA	European	Males and Females	2018	10534735	3301	NA	NA	Immune system	Protein	Sun BB	29875488	NA	NA	NA	NA
finn-b-M13_TOEDEFORMOTH	Other deformities of toe(s)	NA	European	Males and Females	2021	16380142	NA	489	147221	Binary	NA	NA	NA	NA	NA	NA	M13_TOEDEFORMOTH
prot-a-837	DnaJ homolog subfamily B member 12	NA	European	Males and Females	2018	10534735	3301	NA	NA	Immune system	Protein	Sun BB	29875488	NA	NA	NA	NA
ubm-a-2576	NET100 1420	NA	European	Males	2018	11734354	7916	NA	NA	Continuous	Psychiatric / neurological	Elliott LT	30305740	NA	NA	NA	NA
ukb-b-18103	Pulse rate, automated reading	MRC-IEU	European	Males and Females	2018	9851867	436424	NA	NA	Continuous	NA	Ben Elsworth	NA	NA	SD	NA	102: Output from GWAS pipeline using Phesant derived variables from UKBiobank
ubm-a-1812	NET100 0656	NA	European	Males	2018	11734354	7916	NA	NA	Continuous	Psychiatric / neurological	Elliott LT	30305740	NA	NA	NA	NA
met-a-713	X-13859	NA	European	Males and Females	2014	2545617	7002	NA	NA	Metabolites	Unknown metabolite	Shin	24816252	NA	log10 units	0.137078	NA
ukb-a-502	Job involves mainly walking or standing	Neale Lab	European	Males and Females	2017	10894596	190606	NA	NA	NA	NA	Neale	NA	NA	SD	NA	NA
prot-a-655	CREB-binding protein	NA	European	Males and Females	2018	10534735	3301	NA	NA	Immune system	Protein	Sun BB	29875488	NA	NA	NA	NA
ebi-a-GCST006867	Type 2 diabetes	NA	European	NA	2018	5030727	655666	61714	1178	NA	NA	Xue A	30054458	NA	logOR	NA	NA
ukb-b-6251	3mm regularity index (right)	MRC-IEU	European	Males and Females	2018	9851867	94284	NA	NA	Continuous	NA	Ben Elsworth	NA	NA	SD	NA	5160: Output from GWAS pipeline using Phesant derived variables from UKBiobank
prot-c-3448_13_2	IR	NA	European	Males and Females	2019	501428	NA	NA	NA	Continuous	NA	Suhre K	28240269	EFO_0007937	NA	NA	name=Insulin receptor; chr=19; start=7112255; end=7294034; entrez=3643; uniprot=P06213
ubm-a-2535	NET100 1379	NA	European	Males	2018	11734354	7916	NA	NA	Continuous	Psychiatric / neurological	Elliott LT	30305740	NA	NA	NA	NA
ukb-b-9981	Sensitivity / hurt feelings	MRC-IEU	European	Males and Females	2018	9851867	449419	249799	199620	Binary	NA	Ben Elsworth	NA	NA	SD	NA	1950: Output from GWAS pipeline using Phesant derived variables from UKBiobank
ebi-a-GCST90011523	TestASV_45 (Clostridiales) abundance	NA	European	NA	2021	5428445	8956	NA	NA	NA	NA	R<U+00FC>hlemann MC	33462482	NA	NA	NA	NA
ukb-b-20187	Operative procedures - secondary OPCS: Y53.2 Approach to organ under ultrasonic control	MRC-IEU	European	Males and Females	2018	9851867	463010	8745	454265	Binary	NA	Ben Elsworth	NA	NA	SD	NA	41210#Y532: Output from GWAS pipeline using Phesant derived variables from UKBiobank
ukb-d-22617_6124	Job SOC coding: Educational assistants	NA	European	Males and Females	2018	10691845	91149	2304	88845	Binary	NA	Neale lab	NA	NA	NA	NA	NA
ubm-a-3137	a2009s rh S temporal sup thickness	NA	European	Males	2018	11734354	8411	NA	NA	Continuous	Psychiatric / neurological	Elliott LT	30305740	NA	NA	NA	NA
finn-b-ST19_ICTRAUOTHUNS	Other and unspecified intracranial injuries	NA	European	Males and Females	2021	16380416	NA	375	205627	Binary	NA	NA	NA	NA	NA	NA	ST19_ICTRAUOTHUNS
finn-b-L12_CELLULITIS	Cellulitis	NA	European	Males and Females	2021	16380457	NA	3085	208449	Binary	NA	NA	NA	NA	NA	NA	L12_CELLULITIS
ebi-a-GCST011071	COVID-19 (RELEASE 5)	NA	European	NA	2020	8103014	1588783	29071	1559712	NA	NA	COVID-19 Host Genetics Initiative	32404885	NA	NA	NA	NA
prot-c-4187_49_2	6-Phosphogluconate dehydrogenase	NA	European	Males and Females	2019	501428	NA	NA	NA	Continuous	NA	Suhre K	28240269	EFO_0007937	NA	NA	name=6-phosphogluconate dehydrogenase, decarboxylating; chr=1; start=10398592; end=10420144; entrez=5226; uniprot=P52209
prot-a-127	Apolipoprotein B	NA	European	Males and Females	2018	10534735	3301	NA	NA	Immune system	Protein	Sun BB	29875488	NA	NA	NA	NA
finn-b-N14_HYDROCELE	Hydrocele	NA	European	Males and Females	2021	16377576	NA	2634	72799	Binary	NA	NA	NA	NA	NA	NA	N14_HYDROCELE
met-a-725	X-14473	NA	European	Males and Females	2014	2545673	6884	NA	NA	Metabolites	Unknown metabolite	Shin	24816252	NA	log10 units	0.257527	NA
prot-a-1450	Insulin-like growth factor-binding protein 6	NA	European	Males and Females	2018	10534735	3301	NA	NA	Immune system	Protein	Sun BB	29875488	NA	NA	NA	NA
prot-a-1411	Alpha-L-iduronidase	NA	European	Males and Females	2018	10534735	3301	NA	NA	Immune system	Protein	Sun BB	29875488	NA	NA	NA	NA
ubm-a-1939	NET100 0783	NA	European	Males	2018	11734354	7916	NA	NA	Continuous	Psychiatric / neurological	Elliott LT	30305740	NA	NA	NA	NA
ukb-b-2003	Errors before selecting correct item in alphanumeric path (trail #2)	MRC-IEU	European	Males and Females	2018	9851867	40607	NA	NA	Categorical Ordered	NA	Ben Elsworth	NA	NA	SD	NA	20148: Output from GWAS pipeline using Phesant derived variables from UKBiobank
prot-a-2522	Replication initiator 1	NA	European	Males and Females	2018	10534735	3301	NA	NA	Immune system	Protein	Sun BB	29875488	NA	NA	NA	NA
met-a-427	2-hydroxyisobutyrate	NA	European	Males and Females	2014	2545252	6539	NA	NA	Metabolites	Amino acid	Shin	24816252	NA	log10 units	0.140564	NA
ebi-a-GCST90001554	Effector Memory CD8+ T cell Absolute Count	NA	European	NA	2020	15129224	3395	NA	NA	NA	NA	Orr<U+00F9> V	32929287	NA	NA	NA	NA
prot-a-2805	Protein SPACA7	NA	European	Males and Females	2018	10534735	3301	NA	NA	Immune system	Protein	Sun BB	29875488	NA	NA	NA	NA
ukb-d-22613_2	Worked with paints, thinners or glues: Often	NA	European	Males and Females	2018	11525313	88718	3723	84995	Binary	NA	Neale lab	NA	NA	NA	NA	NA
prot-a-1967	Mucin-1	NA	European	Males and Females	2018	10534735	3301	NA	NA	Immune system	Protein	Sun BB	29875488	NA	NA	NA	NA
ebi-a-GCST90010219	Granulins levels	NA	European	NA	2020	18221903	1323	NA	NA	NA	NA	Gilly A	33303764	NA	NA	NA	NA
ukb-b-7603	Non-cancer illness code, self-reported: muscle or soft tissue injuries	MRC-IEU	European	Males and Females	2018	9851867	462933	3347	459586	Binary	NA	Ben Elsworth	NA	NA	SD	NA	20002#1406: Output from GWAS pipeline using Phesant derived variables from UKBiobank
ubm-a-1740	NET100 0584	NA	European	Males	2018	11734354	7916	NA	NA	Continuous	Psychiatric / neurological	Elliott LT	30305740	NA	NA	NA	NA
ukb-d-3859_3	Reason former drinker stopped drinking alcohol: Health precaution	NA	European	Males and Females	2018	10809737	12110	2470	9640	Binary	NA	Neale lab	NA	NA	NA	NA	NA
ukb-b-1996	Salad / raw vegetable intake	MRC-IEU	European	Males and Females	2018	9851867	435435	NA	NA	Categorical Ordered	NA	Ben Elsworth	NA	NA	SD	NA	1299: Output from GWAS pipeline using Phesant derived variables from UKBiobank
prot-c-3186_2_2	C2	NA	European	Males and Females	2019	501428	NA	NA	NA	Continuous	NA	Suhre K	28240269	EFO_0007937	NA	NA	name=Complement C2; chr=6; start=31879966; end=32022117; entrez=717; uniprot=P06681
finn-b-C3_CONNECTIVE_SOFT_NAS	Malignant neoplasm of other connective and soft tissue	NA	European	Males and Females	2021	16380466	NA	275	218517	Binary	NA	NA	NA	NA	NA	NA	C3_CONNECTIVE_SOFT_NAS
ukb-b-8131	Operative procedures - main OPCS: H25.1 Diagnostic endoscopic examination of lower bowel and biopsy of lesion of lower bowel using fibreoptic sigmoidoscope	MRC-IEU	European	Males and Females	2018	9851867	463010	7880	455130	Binary	NA	Ben Elsworth	NA	NA	SD	NA	41200#H251: Output from GWAS pipeline using Phesant derived variables from UKBiobank
prot-a-1872	Nuclear protein MDM1	NA	European	Males and Females	2018	10534735	3301	NA	NA	Immune system	Protein	Sun BB	29875488	NA	NA	NA	NA
prot-a-633	COMM domain-containing protein 1	NA	European	Males and Females	2018	10534735	3301	NA	NA	Immune system	Protein	Sun BB	29875488	NA	NA	NA	NA
finn-b-AB1_CANDIDIASIS	Candidiasis	NA	European	Males and Females	2021	16380463	NA	2015	214816	Binary	NA	NA	NA	NA	NA	NA	AB1_CANDIDIASIS
ukb-b-3686	Operative procedures - secondary OPCS: Y98.2 Radiology of two body areas	MRC-IEU	European	Males and Females	2018	9851867	463010	3720	459290	Binary	NA	Ben Elsworth	NA	NA	SD	NA	41210#Y982: Output from GWAS pipeline using Phesant derived variables from UKBiobank
prot-a-1842	Dual specificity mitogen-activated protein kinase kinase 4	NA	European	Males and Females	2018	10534735	3301	NA	NA	Immune system	Protein	Sun BB	29875488	NA	NA	NA	NA
ukb-b-5655	Diagnoses - main ICD10: R42 Dizziness and giddiness	MRC-IEU	European	Males and Females	2018	9851867	463010	1557	461453	Binary	NA	Ben Elsworth	NA	NA	SD	NA	41202#R42: Output from GWAS pipeline using Phesant derived variables from UKBiobank
ubm-a-510	IDP dMRI TBSS ICVF Posterior corona radiata R	NA	European	Males	2018	11734354	7532	NA	NA	Continuous	Psychiatric / neurological	Elliott LT	30305740	NA	NA	NA	NA
prot-a-3102	Thyrotropin-releasing hormone	NA	European	Males and Females	2018	10534735	3301	NA	NA	Immune system	Protein	Sun BB	29875488	NA	NA	NA	NA
ukb-b-4210	Frequency of light DIY in last 4 weeks	MRC-IEU	European	Males and Females	2018	9851867	228298	NA	NA	Categorical Ordered	NA	Ben Elsworth	NA	NA	SD	NA	1011: Output from GWAS pipeline using Phesant derived variables from UKBiobank
met-b-130	B Mem:%IgA	NA	European	Females	2015	1623131	497	NA	NA	Immune system	Immune cell subset frequency	Roederer	25772697	NA	%	10.3273	Female twins
met-d-L_LDL_PL	Phospholipids in large LDL	NA	European	Males and Females	2020	12321875	115078	NA	NA	Continuous	NA	Borges CM	NA	NA	NA	NA	NA
ebi-a-GCST010781	COVID-19 (predicted covid from self-reported symptoms vs predicted or self-reported non-covid) RELEASE 4	NA	European	NA	2020	11379674	38932	3204	35728	NA	NA	COVID-19 Host Genetics Initiative	32404885	NA	NA	NA	NA
ubm-a-2126	NET100 0970	NA	European	Males	2018	11734354	7916	NA	NA	Continuous	Psychiatric / neurological	Elliott LT	30305740	NA	NA	NA	NA
prot-a-311	Uncharacterized protein C2orf66	NA	European	Males and Females	2018	10534735	3301	NA	NA	Immune system	Protein	Sun BB	29875488	NA	NA	NA	NA
prot-a-674	Beta-crystallin B2	NA	European	Males and Females	2018	10534735	3301	NA	NA	Immune system	Protein	Sun BB	29875488	NA	NA	NA	NA
prot-c-2640_3_2	MSP R	NA	European	Males and Females	2019	501428	NA	NA	NA	Continuous	NA	Suhre K	28240269	EFO_0007937	NA	NA	name=Macrophage-stimulating protein receptor; chr=3; start=49887002; end=49903873; entrez=4486; uniprot=Q04912
ukb-b-469	Number of cigarettes currently smoked daily (current cigarette smokers)	MRC-IEU	European	Males and Females	2018	9851867	33229	NA	NA	Categorical Ordered	NA	Ben Elsworth	NA	NA	SD	NA	3456: Output from GWAS pipeline using Phesant derived variables from UKBiobank
prot-c-5007_1_1	MAPK14	NA	European	Males and Females	2019	501428	NA	NA	NA	Continuous	NA	Suhre K	28240269	EFO_0007937	NA	NA	name=Mitogen-activated protein kinase 14; chr=6; start=36027677; end=36111236; entrez=1432; uniprot=Q16539
prot-c-2455_17_4	IL-12	NA	European	Males and Females	2019	501428	NA	NA	NA	Continuous	NA	Suhre K	28240269	EFO_0007937	NA	NA	name=Interleukin-12; chr=3|5; start=159988750|159314783; end=159996019|159330887; entrez=3592|3593; uniprot=P29459|P29460
ukb-b-15336	PCT where patients GP was registered: RICHMOND AND TWICKENHAM PCT	MRC-IEU	European	Males and Females	2018	9851867	463010	2749	460261	Binary	NA	Ben Elsworth	NA	NA	SD	NA	41230#5M6: Output from GWAS pipeline using Phesant derived variables from UKBiobank
ukb-b-6400	PCT where patients GP was registered: CALDERDALE PCT	MRC-IEU	European	Males and Females	2018	9851867	463010	1817	461193	Binary	NA	Ben Elsworth	NA	NA	SD	NA	41230#5J6: Output from GWAS pipeline using Phesant derived variables from UKBiobank
finn-b-ST19_FRACT_LUMBAR_SPINE_PELVIS	Fracture of lumbar spine and pelvis	NA	European	Males and Females	2021	16380457	NA	2859	212839	Binary	NA	NA	NA	NA	NA	NA	ST19_FRACT_LUMBAR_SPINE_PELVIS
ieu-b-4841	HbA1c	Within family GWAS consortium	European	Males and Females	2022	NA	17724	NA	NA	NA	NA	Howe LJ	NA	EFO:0004541	NA	NA	Sibling estimate
finn-b-G6_ULLNLE	Lesion of ulnar nerve	NA	European	Males and Females	2021	16380416	NA	2006	195047	Binary	NA	NA	NA	NA	NA	NA	G6_ULLNLE
ebi-a-GCST90001487	Activated CD4 regulatory T cell %CD4 regulatory T cell	NA	European	NA	2020	15144196	3437	NA	NA	NA	NA	Orr<U+00F9> V	32929287	NA	NA	NA	NA
ukb-b-3337	Treatment/medication code: nasonex 0.05% aqueous nasal spray	MRC-IEU	European	Males and Females	2018	9851867	462933	2316	460617	Binary	NA	Ben Elsworth	NA	NA	SD	NA	20003#1141150944: Output from GWAS pipeline using Phesant derived variables from UKBiobank
ukb-b-16573	Operative procedures - main OPCS: U21.2 Computed tomography NEC	MRC-IEU	European	Males and Females	2018	9851867	463010	4510	458500	Binary	NA	Ben Elsworth	NA	NA	SD	NA	41200#U212: Output from GWAS pipeline using Phesant derived variables from UKBiobank
prot-a-480	Cadherin-1	NA	European	Males and Females	2018	10534735	3301	NA	NA	Immune system	Protein	Sun BB	29875488	NA	NA	NA	NA
ubm-a-2206	NET100 1050	NA	European	Males	2018	11734354	7916	NA	NA	Continuous	Psychiatric / neurological	Elliott LT	30305740	NA	NA	NA	NA
ieu-a-27	Birth weight	EGG	European	Males and Females	2013	2684394	26836	NA	NA	Risk factor	Anthropometric	Horikoshi M	23202124	NA	g	547.534	Effect allele frequencies are missing
ubm-a-513	IDP dMRI TBSS ICVF Posterior thalamic radiation L	NA	European	Males	2018	11734354	7532	NA	NA	Continuous	Psychiatric / neurological	Elliott LT	30305740	NA	NA	NA	NA
ubm-a-240	IDP dMRI TBSS FA Uncinate fasciculus R	NA	European	Males	2018	11734354	7532	NA	NA	Continuous	Psychiatric / neurological	Elliott LT	30305740	NA	NA	NA	NA
ukb-b-1251	Type of cancer: ICD10: C20 Malignant neoplasm of rectum	MRC-IEU	European	Males and Females	2018	9851867	463010	1470	461540	Binary	NA	Ben Elsworth	NA	NA	SD	NA	40006#C20: Output from GWAS pipeline using Phesant derived variables from UKBiobank
finn-b-Q17_CYSTIC_KIDNEY_DISEA	Cystic kidney disease	NA	European	Males and Females	2021	16380465	NA	469	217979	Binary	NA	NA	NA	NA	NA	NA	Q17_CYSTIC_KIDNEY_DISEA
prot-a-2543	Protein RIC-3	NA	European	Males and Females	2018	10534735	3301	NA	NA	Immune system	Protein	Sun BB	29875488	NA	NA	NA	NA
ubm-a-2387	NET100 1231	NA	European	Males	2018	11734354	7916	NA	NA	Continuous	Psychiatric / neurological	Elliott LT	30305740	NA	NA	NA	NA
finn-b-C3_BRAIN	Malignant neoplasm of brain	NA	European	Males and Females	2021	16380466	NA	464	218328	Binary	NA	NA	NA	NA	NA	NA	C3_BRAIN
ukb-b-4817	Operative procedures - secondary OPCS: Y98.1 Radiology of one body area (or < 20 minutes)	MRC-IEU	European	Males and Females	2018	9851867	463010	12252	450758	Binary	NA	Ben Elsworth	NA	NA	SD	NA	41210#Y981: Output from GWAS pipeline using Phesant derived variables from UKBiobank
ubm-a-2266	NET100 1110	NA	European	Males	2018	11734354	7916	NA	NA	Continuous	Psychiatric / neurological	Elliott LT	30305740	NA	NA	NA	NA
prot-a-3262	Zinc finger protein 175	NA	European	Males and Females	2018	10534735	3301	NA	NA	Immune system	Protein	Sun BB	29875488	NA	NA	NA	NA
met-a-342	Glycerate	NA	European	Males and Females	2014	2545821	7778	NA	NA	Metabolites	Carbohydrate	Shin	24816252	NA	log10 units	0.131903	NA
ubm-a-280	IDP dMRI TBSS MD Cingulum hippocampus R	NA	European	Males	2018	11734354	7532	NA	NA	Continuous	Psychiatric / neurological	Elliott LT	30305740	NA	NA	NA	NA
ubm-a-2440	NET100 1284	NA	European	Males	2018	11734354	7916	NA	NA	Continuous	Psychiatric / neurological	Elliott LT	30305740	NA	NA	NA	NA
ebi-a-GCST90011391	OTU97_30 (Roseburia) abundance	NA	European	NA	2021	5360236	8956	NA	NA	NA	NA	R<U+00FC>hlemann MC	33462482	NA	NA	NA	NA
ubm-a-890	NODEamps25 0020	NA	European	Males	2018	11734354	7916	NA	NA	Continuous	Psychiatric / neurological	Elliott LT	30305740	NA	NA	NA	NA
prot-a-281	Platelet receptor Gi24	NA	European	Males and Females	2018	10534735	3301	NA	NA	Immune system	Protein	Sun BB	29875488	NA	NA	NA	NA
ubm-a-1238	NET100 0082	NA	European	Males	2018	11734354	7916	NA	NA	Continuous	Psychiatric / neurological	Elliott LT	30305740	NA	NA	NA	NA
finn-b-E4_GOITRENAS	Other and/or unspecified nontoxic goitre	NA	European	Males and Females	2021	16380382	NA	1252	187684	Binary	NA	NA	NA	NA	NA	NA	E4_GOITRENAS
prot-a-227	B melanoma antigen 2	NA	European	Males and Females	2018	10534735	3301	NA	NA	Immune system	Protein	Sun BB	29875488	NA	NA	NA	NA
prot-a-1403	Inducible T-cell costimulator	NA	European	Males and Females	2018	10534735	3301	NA	NA	Immune system	Protein	Sun BB	29875488	NA	NA	NA	NA
ebi-a-GCST90000506	Vascular endothelial growth factor A levels	NA	European	NA	2020	7883872	982	NA	NA	NA	NA	Hillary RF	32641083	NA	NA	NA	NA
ukb-a-223	Illnesses of siblings: Diabetes	Neale Lab	European	Males and Females	2017	10894596	259921	21747	239328	NA	NA	Neale	NA	NA	SD	NA	NA
prot-b-41	X-prolyl aminopeptidase 2	NA	European	Males and Females	2018	5270646	3394	NA	NA	Immune system	Protein	Folkersen L	28369058	NA	NA	NA	NA
prot-a-36	A disintegrin and metalloproteinase with thrombospondin motifs 5	NA	European	Males and Females	2018	10534735	3301	NA	NA	Immune system	Protein	Sun BB	29875488	NA	NA	NA	NA
ubm-a-1922	NET100 0766	NA	European	Males	2018	11734354	7916	NA	NA	Continuous	Psychiatric / neurological	Elliott LT	30305740	NA	NA	NA	NA
ukb-d-22617_1152	Job SOC coding: Office managers	NA	European	Males and Females	2018	9483745	91149	1121	90028	Binary	NA	Neale lab	NA	NA	NA	NA	NA
ebi-a-GCST90001477	HLA DR++ monocyte Absolute Count	NA	European	NA	2020	15157999	3579	NA	NA	NA	NA	Orr<U+00F9> V	32929287	NA	NA	NA	NA
ebi-a-GCST90011479	OTU99_94 (Bacteroides) abundance	NA	European	NA	2021	5295239	8956	NA	NA	NA	NA	R<U+00FC>hlemann MC	33462482	NA	NA	NA	NA
met-d-XXL_VLDL_TG_pct	Triglycerides to total lipids ratio in chylomicrons and extremely large VLDL	NA	European	Males and Females	2020	12321875	111631	NA	NA	Continuous	NA	Borges CM	NA	NA	NA	NA	NA
prot-a-825	Dihydrolipoyl dehydrogenase, mitochondrial	NA	European	Males and Females	2018	10534735	3301	NA	NA	Immune system	Protein	Sun BB	29875488	NA	NA	NA	NA
ebi-a-GCST90011351	O_Coriobacteriales abundance	NA	European	NA	2021	5403738	8956	NA	NA	NA	NA	R<U+00FC>hlemann MC	33462482	NA	NA	NA	NA
prot-a-903	Ephrin-B1	NA	European	Males and Females	2018	10534735	3301	NA	NA	Immune system	Protein	Sun BB	29875488	NA	NA	NA	NA
prot-a-893	Early endosome antigen 1	NA	European	Males and Females	2018	10534735	3301	NA	NA	Immune system	Protein	Sun BB	29875488	NA	NA	NA	NA
prot-a-93	Angiopoietin-2	NA	European	Males and Females	2018	10534735	3301	NA	NA	Immune system	Protein	Sun BB	29875488	NA	NA	NA	NA
prot-c-2436_49_4	CXCL16, soluble	NA	European	Males and Females	2019	501428	NA	NA	NA	Continuous	NA	Suhre K	28240269	EFO_0007937	NA	NA	name=C-X-C motif chemokine 16; chr=17; start=4733526; end=4739922; entrez=58191; uniprot=Q9H2A7
finn-b-T1D	Type1 diabetes, definitions combined	NA	European	Males and Females	2021	16380235	NA	2685	182573	Binary	NA	NA	NA	NA	NA	NA	T1D
ukb-b-2535	Falls in the last year	MRC-IEU	European	Males and Females	2018	9851867	461725	NA	NA	Categorical Ordered	NA	Ben Elsworth	NA	NA	SD	NA	2296: Output from GWAS pipeline using Phesant derived variables from UKBiobank
ebi-a-GCST90001528	CD33dim HLA DR+ CD11b- %CD33dim HLA DR+	NA	European	NA	2020	14304991	1858	NA	NA	NA	NA	Orr<U+00F9> V	32929287	NA	NA	NA	NA
ebi-a-GCST004074	Intraocular pressure	NA	European	NA	2017	11458861	29578	NA	NA	NA	NA	Springelkamp H	28073927	NA	NA	NA	NA
finn-b-I9_OTHARR	Other arrhytmias	NA	European	Males and Females	2021	16380272	NA	13250	156711	Binary	NA	NA	NA	NA	NA	NA	I9_OTHARR
ukb-d-4803_14	Tinnitus: Yes, but not now, but have in the past	NA	European	Males and Females	2018	13567874	117882	13080	104802	Binary	NA	Neale lab	NA	NA	NA	NA	NA
finn-b-M13_MYOSITIS	Myositis	NA	European	Males and Females	2021	16380308	NA	330	167641	Binary	NA	NA	NA	NA	NA	NA	M13_MYOSITIS
prot-a-2586	60S ribosomal protein L30	NA	European	Males and Females	2018	10534735	3301	NA	NA	Immune system	Protein	Sun BB	29875488	NA	NA	NA	NA
ebi-a-GCST90017027	Gut microbiota abundance (genus Lachnospiraceae UCG008 id.11328)	NA	European	NA	2021	5401028	14306	NA	NA	NA	NA	Kurilshikov A	33462485	NA	NA	NA	NA
prot-a-409	C-C motif chemokine 5	NA	European	Males and Females	2018	10534735	3301	NA	NA	Immune system	Protein	Sun BB	29875488	NA	NA	NA	NA
ubm-a-36	IDP T1 FAST ROIs L inf front gyrus parsop	NA	European	Males	2018	11734354	8427	NA	NA	Continuous	Psychiatric / neurological	Elliott LT	30305740	NA	NA	NA	NA
prot-a-254	Bone morphogenetic protein 10	NA	European	Males and Females	2018	10534735	3301	NA	NA	Immune system	Protein	Sun BB	29875488	NA	NA	NA	NA
ukb-b-20214	Attendance/disability/mobility allowance: Disability living allowance	MRC-IEU	European	Males and Females	2018	9851867	459354	20426	438928	Binary	NA	Ben Elsworth	NA	NA	SD	NA	6146#2: Output from GWAS pipeline using Phesant derived variables from UKBiobank
ubm-a-2363	NET100 1207	NA	European	Males	2018	11734354	7916	NA	NA	Continuous	Psychiatric / neurological	Elliott LT	30305740	NA	NA	NA	NA
finn-b-L12_HYPETROPHICSCAR	Hypertrophic scar	NA	European	Males and Females	2021	16380443	NA	766	207482	Binary	NA	NA	NA	NA	NA	NA	L12_HYPETROPHICSCAR
finn-b-F5_AUTISM	Autism	NA	European	Males and Females	2021	16380457	NA	293	216829	Binary	NA	NA	NA	NA	NA	NA	F5_AUTISM
prot-c-4566_24_3	RSPO2	NA	European	Males and Females	2019	501428	NA	NA	NA	Continuous	NA	Suhre K	28240269	EFO_0007937	NA	NA	name=R-spondin-2; chr=8; start=107899316; end=108083648; entrez=340419; uniprot=Q6UXX9
ukb-a-231	Forced expiratory volume in 1-second (FEV1) Best measure	Neale Lab	European	Males and Females	2017	10894596	255492	NA	NA	NA	NA	Neale	NA	NA	SD	NA	NA
ubm-a-620	IDP dMRI TBSS ISOVF Superior longitudinal fasciculus R	NA	European	Males	2018	11734354	7532	NA	NA	Continuous	Psychiatric / neurological	Elliott LT	30305740	NA	NA	NA	NA
prot-c-5023_23_1	PUR8	NA	European	Males and Females	2019	501428	NA	NA	NA	Continuous	NA	Suhre K	28240269	EFO_0007937	NA	NA	name=Adenylosuccinate lyase; chr=22; start=40346500; end=40369367; entrez=158; uniprot=P30566
ukb-b-7337	Types of physical activity in last 4 weeks: Walking for pleasure (not as a means of transport)	MRC-IEU	European	Males and Females	2018	9851867	460376	329755	130621	Binary	NA	Ben Elsworth	NA	NA	SD	NA	6164#1: Output from GWAS pipeline using Phesant derived variables from UKBiobank
ebi-a-GCST90012036	Pappalysin-1 levels	NA	European	NA	2020	13026368	21758	NA	NA	NA	NA	Folkersen L	33067605	NA	NA	NA	NA
ebi-a-GCST90011670	OTU99_62 (Ruminococcaceae) prevalence	NA	European	NA	2021	5438111	8956	NA	NA	NA	NA	R<U+00FC>hlemann MC	33462482	NA	NA	NA	NA
ebi-a-GCST003373	Glomerular filtration rate in diabetics (creatinine)	NA	European	NA	2016	2169300	11522	NA	NA	NA	NA	Pattaro C	26831199	NA	NA	NA	NA
ukb-a-238	Pack years adult smoking as proportion of life span exposed to smoking PREVIEW ONLY	Neale Lab	European	Males and Females	2017	10894596	101726	NA	NA	NA	NA	Neale	NA	NA	SD	NA	NA
prot-a-2730	Sialic acid-binding Ig-like lectin 8	NA	European	Males and Females	2018	10534735	3301	NA	NA	Immune system	Protein	Sun BB	29875488	NA	NA	NA	NA
ebi-a-GCST90001770	CD24 on IgD- CD38dim B cell	NA	European	NA	2020	4520893	3649	NA	NA	NA	NA	Orr<U+00F9> V	32929287	NA	NA	NA	NA
prot-a-1330	Probable E3 ubiquitin-protein ligase HERC4	NA	European	Males and Females	2018	10534735	3301	NA	NA	Immune system	Protein	Sun BB	29875488	NA	NA	NA	NA
prot-a-3083	Triosephosphate isomerase	NA	European	Males and Females	2018	10534735	3301	NA	NA	Immune system	Protein	Sun BB	29875488	NA	NA	NA	NA
prot-a-1522	Interleukin-31 receptor subunit alpha	NA	European	Males and Females	2018	10534735	3301	NA	NA	Immune system	Protein	Sun BB	29875488	NA	NA	NA	NA
ukb-b-7352	Diagnoses - secondary ICD10: Z92.1 Personal history of long-term (current) use of anticoagulants	MRC-IEU	European	Males and Females	2018	9851867	463010	5254	457756	Binary	NA	Ben Elsworth	NA	NA	SD	NA	41204#Z921: Output from GWAS pipeline using Phesant derived variables from UKBiobank
ukb-d-22601_22113066	Job coding: medical doctor, general practitioner, hospital consultant	NA	European	Males and Females	2018	9930735	89866	1467	88399	Binary	NA	Neale lab	NA	NA	NA	NA	NA
met-a-329	Palmitate (16:0)	NA	European	Males and Females	2014	2545680	7800	NA	NA	Metabolites	Fatty acid	Shin	24816252	NA	log10 units	0.110023	NA
prot-c-4232_19_2	IGF-I sR	NA	European	Males and Females	2019	501428	NA	NA	NA	Continuous	NA	Suhre K	28240269	EFO_0007937	NA	NA	name=Insulin-like growth factor 1 receptor; chr=15; start=98648971; end=98964530; entrez=3480; uniprot=P08069
finn-b-CD2_BENIGN_PROSTATE	Benign neoplasm: Prostate	NA	European	Males and Females	2021	16378835	NA	97	95116	Binary	NA	NA	NA	NA	NA	NA	CD2_BENIGN_PROSTATE
ubm-a-1434	NET100 0278	NA	European	Males	2018	11734354	7916	NA	NA	Continuous	Psychiatric / neurological	Elliott LT	30305740	NA	NA	NA	NA
finn-b-H8_VERTIGOCENT	Vertigo of central origin	NA	European	Males and Females	2021	16380424	NA	186	209582	Binary	NA	NA	NA	NA	NA	NA	H8_VERTIGOCENT
ubm-a-2868	a2009s rh G front sup area	NA	European	Males	2018	11734354	8411	NA	NA	Continuous	Psychiatric / neurological	Elliott LT	30305740	NA	NA	NA	NA
ebi-a-GCST90020168	Executive function (verbal digit span backwards test)	NA	European	NA	2021	7313508	1297	NA	NA	NA	NA	Wendel B	34247186	NA	NA	NA	NA
ieu-a-1107	Urinary albumin-to-creatinine ratio	CKDGen	European	Males and Females	2015	2190189	54450	NA	NA	Risk factor	Kidney	Teumer	26631737	NA	log mg/g	0.96	NA
ukb-a-497	Mineral and other dietary supplements: Selenium	Neale Lab	European	Males and Females	2017	10894596	336314	7822	328492	NA	NA	Neale	NA	NA	SD	NA	NA
ukb-a-566	Diagnoses - main ICD10: M23 Internal derangement of knee	Neale Lab	European	Males and Females	2017	10894596	337199	7489	329710	NA	NA	Neale	NA	NA	SD	NA	NA
ukb-b-12964	Diagnoses - secondary ICD10: M17.1 Other primary gonarthrosis	MRC-IEU	European	Males and Females	2018	9851867	463010	1492	461518	Binary	NA	Ben Elsworth	NA	NA	SD	NA	41204#M171: Output from GWAS pipeline using Phesant derived variables from UKBiobank
finn-b-N14_OLIGOMEN	Oligomenorrhoea	NA	European	Males and Females	2021	16376207	NA	606	68969	Binary	NA	NA	NA	NA	NA	NA	N14_OLIGOMEN
ubm-a-293	IDP dMRI TBSS MO Pontine crossing tract	NA	European	Males	2018	11734354	7532	NA	NA	Continuous	Psychiatric / neurological	Elliott LT	30305740	NA	NA	NA	NA
ukb-b-19780	Methods of admission to hospital (recoded): Emergency admission: Outpatients (obsolete)	MRC-IEU	European	Males and Females	2018	9851867	462463	10856	451607	Binary	NA	Ben Elsworth	NA	NA	SD	NA	41249#2004: Output from GWAS pipeline using Phesant derived variables from UKBiobank
ukb-b-11459	PCT responsible for patient data: BIRMINGHAM EAST AND NORTH PCT	MRC-IEU	European	Males and Females	2018	9851867	463010	2464	460546	Binary	NA	Ben Elsworth	NA	NA	SD	NA	41229#5PG: Output from GWAS pipeline using Phesant derived variables from UKBiobank
ukb-d-22617_2312	Job SOC coding: Further education teaching professionals	NA	European	Males and Females	2018	10846784	91149	2520	88629	Binary	NA	Neale lab	NA	NA	NA	NA	NA
ukb-b-3768	Age when periods started (menarche)	MRC-IEU	European	Males and Females	2018	9851867	243944	NA	NA	Categorical Ordered	NA	Ben Elsworth	NA	NA	SD	NA	2714: Output from GWAS pipeline using Phesant derived variables from UKBiobank
ukb-b-10258	Treatment/medication code: paroxetine	MRC-IEU	European	Males and Females	2018	9851867	462933	1554	461379	Binary	NA	Ben Elsworth	NA	NA	SD	NA	20003#1140867888: Output from GWAS pipeline using Phesant derived variables from UKBiobank
ubm-a-332	IDP dMRI TBSS MO Superior longitudinal fasciculus R	NA	European	Males	2018	11734354	7532	NA	NA	Continuous	Psychiatric / neurological	Elliott LT	30305740	NA	NA	NA	NA
ubm-a-2133	NET100 0977	NA	European	Males	2018	11734354	7916	NA	NA	Continuous	Psychiatric / neurological	Elliott LT	30305740	NA	NA	NA	NA
ukb-b-1732	3mm asymmetry angle (right)	MRC-IEU	European	Males and Females	2018	9851867	94258	NA	NA	Continuous	NA	Ben Elsworth	NA	NA	SD	NA	5108: Output from GWAS pipeline using Phesant derived variables from UKBiobank
ubm-a-2750	a2009s lh G&S subcentral area	NA	European	Males	2018	11734354	8411	NA	NA	Continuous	Psychiatric / neurological	Elliott LT	30305740	NA	NA	NA	NA
ebi-a-GCST90012056	Matrix metalloproteinase-7 levels	NA	European	NA	2020	12938892	21758	NA	NA	NA	NA	Folkersen L	33067605	NA	NA	NA	NA
prot-a-2917	Synaptotagmin-8	NA	European	Males and Females	2018	10534735	3301	NA	NA	Immune system	Protein	Sun BB	29875488	NA	NA	NA	NA
ebi-a-GCST005522	Narcolepsy	NA	European	NA	2013	93613	12307	1886	10421	NA	NA	Faraco J	23459209	NA	logOR	NA	beta+se converted from OR+CI;
ukb-b-10912	Non-cancer illness code, self-reported: high cholesterol	MRC-IEU	European	Males and Females	2018	9851867	462933	56753	406180	Binary	NA	Ben Elsworth	NA	NA	SD	NA	20002#1473: Output from GWAS pipeline using Phesant derived variables from UKBiobank
prot-a-1661	Prostate-specific antigen	NA	European	Males and Females	2018	10534735	3301	NA	NA	Immune system	Protein	Sun BB	29875488	NA	NA	NA	NA
finn-b-N14_ENDOMETRIOSIS_FALLOPIAN_TUBE	Endometriosis of fallopian tube	NA	European	Males and Females	2021	16376156	NA	116	68969	Binary	NA	NA	NA	NA	NA	NA	N14_ENDOMETRIOSIS_FALLOPIAN_TUBE
prot-a-1246	Glypican-3	NA	European	Males and Females	2018	10534735	3301	NA	NA	Immune system	Protein	Sun BB	29875488	NA	NA	NA	NA
ieu-a-73	Waist-to-hip ratio	GIANT	European	Males and Females	2015	2560782	212244	NA	NA	Risk factor	Anthropometric	Shungin D	25673412	NA	SD	0.0760794	Effect allele frequecies are missing
ubm-a-1474	NET100 0318	NA	European	Males	2018	11734354	7916	NA	NA	Continuous	Psychiatric / neurological	Elliott LT	30305740	NA	NA	NA	NA
prot-a-35	A disintegrin and metalloproteinase with thrombospondin motifs 4	NA	European	Males and Females	2018	10534735	3301	NA	NA	Immune system	Protein	Sun BB	29875488	NA	NA	NA	NA
ukb-a-535	Diagnoses - main ICD10: I30 Acute pericarditis	Neale Lab	European	Males and Females	2017	10894596	337199	107	337092	NA	NA	Neale	NA	NA	SD	NA	NA
prot-c-4393_3_1	FGF-16	NA	European	Males and Females	2019	501428	NA	NA	NA	Continuous	NA	Suhre K	28240269	EFO_0007937	NA	NA	name=Fibroblast growth factor 16; chr=X; start=77447405; end=77457278; entrez=8823; uniprot=O43320
finn-b-M13_DEFORMDORSO	Deforming dorsopathies	NA	European	Males and Females	2021	16380291	NA	4652	164682	Binary	NA	NA	NA	NA	NA	NA	M13_DEFORMDORSO
ebi-a-GCST007518	Type 2 diabetes (adjusted for BMI)	NA	European	NA	2018	190208	298957	48286	250671	NA	NA	Mahajan A	29632382	NA	NA	NA	NA
prot-c-5347_59_3	Cyclin B1	NA	European	Males and Females	2019	501428	NA	NA	NA	Continuous	NA	Suhre K	28240269	EFO_0007937	NA	NA	name=G2/mitotic-specific cyclin-B1; chr=5; start=69167010; end=69178245; entrez=891; uniprot=P14635
ubm-a-2014	NET100 0858	NA	European	Males	2018	11734354	7916	NA	NA	Continuous	Psychiatric / neurological	Elliott LT	30305740	NA	NA	NA	NA
ubm-a-2148	NET100 0992	NA	European	Males	2018	11734354	7916	NA	NA	Continuous	Psychiatric / neurological	Elliott LT	30305740	NA	NA	NA	NA
ukb-d-22617_1234	Job SOC coding: Shopkeepers and wholesale/retail dealers	NA	European	Males and Females	2018	9930458	91149	1467	89682	Binary	NA	Neale lab	NA	NA	NA	NA	NA
prot-a-2672	Semaphorin-3E	NA	European	Males and Females	2018	10534735	3301	NA	NA	Immune system	Protein	Sun BB	29875488	NA	NA	NA	NA
finn-b-ST19_SUPERF_FROST	Superficial frostbite	NA	European	Males and Females	2021	16380466	NA	98	218631	Binary	NA	NA	NA	NA	NA	NA	ST19_SUPERF_FROST
ubm-a-2770	a2009s lh G orbital area	NA	European	Males	2018	11734354	8411	NA	NA	Continuous	Psychiatric / neurological	Elliott LT	30305740	NA	NA	NA	NA
ebi-a-GCST003837	Chronotype	NA	European	NA	2016	16832291	127898	NA	NA	NA	NA	Jones SE	27494321	NA	NA	NA	NA
met-d-VLDL_TG	Triglycerides in VLDL	NA	European	Males and Females	2020	12321875	115078	NA	NA	Continuous	NA	Borges CM	NA	NA	NA	NA	NA
ubm-a-701	IDP dMRI ProbtrackX MO ptr l	NA	European	Males	2018	11734354	7532	NA	NA	Continuous	Psychiatric / neurological	Elliott LT	30305740	NA	NA	NA	NA
ubm-a-2342	NET100 1186	NA	European	Males	2018	11734354	7916	NA	NA	Continuous	Psychiatric / neurological	Elliott LT	30305740	NA	NA	NA	NA
prot-a-2560	E3 ubiquitin-protein ligase RNF114	NA	European	Males and Females	2018	10534735	3301	NA	NA	Immune system	Protein	Sun BB	29875488	NA	NA	NA	NA
ukb-b-12729	Operation code: nephrectomy/kidney removed	MRC-IEU	European	Males and Females	2018	9851867	462933	1638	461295	Binary	NA	Ben Elsworth	NA	NA	SD	NA	20004#1487: Output from GWAS pipeline using Phesant derived variables from UKBiobank
prot-a-287	Uncharacterized protein C17orf78	NA	European	Males and Females	2018	10534735	3301	NA	NA	Immune system	Protein	Sun BB	29875488	NA	NA	NA	NA
ukb-b-10011	Townsend deprivation index at recruitment	MRC-IEU	European	Males and Females	2018	9851867	462464	NA	NA	Continuous	NA	Ben Elsworth	NA	NA	SD	NA	189: Output from GWAS pipeline using Phesant derived variables from UKBiobank
ubm-a-455	IDP dMRI TBSS L3 Posterior limb of internal capsule L	NA	European	Males	2018	11734354	7532	NA	NA	Continuous	Psychiatric / neurological	Elliott LT	30305740	NA	NA	NA	NA
ubm-a-2874	a2009s rh G oc-temp med-Lingual area	NA	European	Males	2018	11734354	8411	NA	NA	Continuous	Psychiatric / neurological	Elliott LT	30305740	NA	NA	NA	NA
prot-b-48	matrix metallopeptidase 10	NA	European	Males and Females	2018	5270646	3394	NA	NA	Immune system	Protein	Folkersen L	28369058	NA	NA	NA	NA
prot-a-1915	Matrix metalloproteinase-16	NA	European	Males and Females	2018	10534735	3301	NA	NA	Immune system	Protein	Sun BB	29875488	NA	NA	NA	NA
finn-b-M13_SPONDYLOPATHYNAS	Other specified/unspecified spondylopathies	NA	European	Males and Females	2021	16380218	NA	364	164682	Binary	NA	NA	NA	NA	NA	NA	M13_SPONDYLOPATHYNAS
ukb-b-15590	Hip circumference	MRC-IEU	European	Males and Females	2018	9851867	462117	NA	NA	Continuous	NA	Ben Elsworth	NA	NA	SD	NA	49: Output from GWAS pipeline using Phesant derived variables from UKBiobank
prot-a-206	Axin-2	NA	European	Males and Females	2018	10534735	3301	NA	NA	Immune system	Protein	Sun BB	29875488	NA	NA	NA	NA
ubm-a-2235	NET100 1079	NA	European	Males	2018	11734354	7916	NA	NA	Continuous	Psychiatric / neurological	Elliott LT	30305740	NA	NA	NA	NA
ukb-b-13584	Illnesses of mother: Breast cancer	MRC-IEU	European	Males and Females	2018	9851867	423458	35102	388356	Binary	NA	Ben Elsworth	NA	NA	SD	NA	20110#5: Output from GWAS pipeline using Phesant derived variables from UKBiobank
prot-c-2853_68_2	CHK1	NA	European	Males and Females	2019	501428	NA	NA	NA	Continuous	NA	Suhre K	28240269	EFO_0007937	NA	NA	name=Serine/threonine-protein kinase Chk1; chr=11; start=125625136; end=125676255; entrez=1111; uniprot=O14757
met-d-M_HDL_FC_pct	Free cholesterol to total lipids ratio in medium HDL	NA	European	Males and Females	2020	12321875	115078	NA	NA	Continuous	NA	Borges CM	NA	NA	NA	NA	NA
finn-b-DM_VITREOUS_BLEEDING	Vitreous bleeding (caused by prolif. dmrp when together with H36.03*)	NA	European	Males and Females	2021	16380421	NA	1341	204208	Binary	NA	NA	NA	NA	NA	NA	DM_VITREOUS_BLEEDING
ukb-b-6885	Types of spread used on bread/crackers: Spreadable butter on bread/crackers	MRC-IEU	European	Males and Females	2018	9851867	64949	6693	58256	Binary	NA	Ben Elsworth	NA	NA	SD	NA	20087#160: Output from GWAS pipeline using Phesant derived variables from UKBiobank
ebi-a-GCST90001788	CD25 on IgD- CD38+ B cell	NA	European	NA	2020	15049126	3656	NA	NA	NA	NA	Orr<U+00F9> V	32929287	NA	NA	NA	NA
finn-b-T1D_STRICT2	Type 1 diabetes, strict definition, subgroup 2	NA	European	Males and Females	2021	16380313	NA	97	180722	Binary	NA	NA	NA	NA	NA	NA	T1D_STRICT2
ukb-b-12205	Chest pain felt during physical activity	MRC-IEU	European	Males and Females	2018	9851867	69537	NA	NA	Categorical Ordered	NA	Ben Elsworth	NA	NA	SD	NA	6015: Output from GWAS pipeline using Phesant derived variables from UKBiobank
ubm-a-2916	a2009s rh S orbital-H Shaped area	NA	European	Males	2018	11734354	8411	NA	NA	Continuous	Psychiatric / neurological	Elliott LT	30305740	NA	NA	NA	NA
met-a-547	X-11818	NA	European	Males and Females	2014	2546063	6790	NA	NA	Metabolites	Unknown metabolite	Shin	24816252	NA	log10 units	0.159137	NA
finn-b-M13_NECROVASC	Other necrotizing vasculopathies	NA	European	Males and Females	2021	16380456	NA	946	213145	Binary	NA	NA	NA	NA	NA	NA	M13_NECROVASC
finn-b-E4_HYTHY_AI_STRICT_PURCH	Hypothyroidism, strict autoimmune, 3 medication purchases required	NA	European	Males and Females	2021	16380466	NA	26064	192728	Binary	NA	NA	NA	NA	NA	NA	E4_HYTHY_AI_STRICT_PURCH
ubm-a-2887	a2009s rh G temp sup-Plan polar area	NA	European	Males	2018	11734354	8411	NA	NA	Continuous	Psychiatric / neurological	Elliott LT	30305740	NA	NA	NA	NA
prot-a-2426	Prostaglandin-H2 D-isomerase	NA	European	Males and Females	2018	10534735	3301	NA	NA	Immune system	Protein	Sun BB	29875488	NA	NA	NA	NA
prot-a-1833	Mannosyl-oligosaccharide 1,2-alpha-mannosidase IB	NA	European	Males and Females	2018	10534735	3301	NA	NA	Immune system	Protein	Sun BB	29875488	NA	NA	NA	NA
prot-c-3365_7_2	Dkk-4	NA	European	Males and Females	2019	501428	NA	NA	NA	Continuous	NA	Suhre K	28240269	EFO_0007937	NA	NA	name=Dickkopf-related protein 4; chr=8; start=42374068; end=42377232; entrez=27121; uniprot=Q9UBT3
ubm-a-815	IDP dMRI ProbtrackX ICVF unc l	NA	European	Males	2018	11734354	7532	NA	NA	Continuous	Psychiatric / neurological	Elliott LT	30305740	NA	NA	NA	NA
prot-a-2254	Placenta growth factor	NA	European	Males and Females	2018	10534735	3301	NA	NA	Immune system	Protein	Sun BB	29875488	NA	NA	NA	NA
prot-a-2923	Tumor-associated calcium signal transducer 2	NA	European	Males and Females	2018	10534735	3301	NA	NA	Immune system	Protein	Sun BB	29875488	NA	NA	NA	NA
prot-a-275	Basigin	NA	European	Males and Females	2018	10534735	3301	NA	NA	Immune system	Protein	Sun BB	29875488	NA	NA	NA	NA
ukb-a-367	Happiness	Neale Lab	European	Males and Females	2017	10894596	110935	NA	NA	NA	NA	Neale	NA	NA	SD	NA	NA
prot-a-482	Cadherin-15	NA	European	Males and Females	2018	10534735	3301	NA	NA	Immune system	Protein	Sun BB	29875488	NA	NA	NA	NA
ubm-a-2060	NET100 0904	NA	European	Males	2018	11734354	7916	NA	NA	Continuous	Psychiatric / neurological	Elliott LT	30305740	NA	NA	NA	NA
prot-c-4551_72_3	GP114	NA	European	Males and Females	2019	501428	NA	NA	NA	Continuous	NA	Suhre K	28240269	EFO_0007937	NA	NA	name=Probable G-protein coupled receptor 114; chr=16; start=57542421; end=57591681; entrez=221188; uniprot=Q8IZF4
ebi-a-GCST001837	Intelligence (childhood)	NA	European	NA	2013	1374543	12441	NA	NA	NA	NA	Benyamin B	23358156	NA	NA	NA	NA
ukb-b-4690	Vitamin and/or mineral supplement use: Vitamin C	MRC-IEU	European	Males and Females	2018	9851867	64949	4171	60778	Binary	NA	Ben Elsworth	NA	NA	SD	NA	20084#478: Output from GWAS pipeline using Phesant derived variables from UKBiobank
ubm-a-57	IDP T1 FAST ROIs R inf temp gyrus tempocc	NA	European	Males	2018	11734354	8427	NA	NA	Continuous	Psychiatric / neurological	Elliott LT	30305740	NA	NA	NA	NA
ukb-d-20548_8	Manifestations of mania or irritability: I was more confident than usual	NA	European	Males and Females	2018	11306770	114422	3285	111137	Binary	NA	Neale lab	NA	NA	NA	NA	NA
finn-b-CD2_INSITU_MELANOMA	Melanoma in situ	NA	European	Males and Females	2021	16380466	NA	393	218399	Binary	NA	NA	NA	NA	NA	NA	CD2_INSITU_MELANOMA
finn-b-M13_SPONTRUPTSYNOTEND	Spontaneous rupture of synovium and tendon	NA	European	Males and Females	2021	16380310	NA	1132	167641	Binary	NA	NA	NA	NA	NA	NA	M13_SPONTRUPTSYNOTEND
finn-b-N14_RECURANDPERHEAMATUR_ADVERSE	Recurrent and persistent haematuria, drug-induced	NA	European	Males and Females	2021	16380466	NA	170	218622	Binary	NA	NA	NA	NA	NA	NA	N14_RECURANDPERHEAMATUR_ADVERSE
ebi-a-GCST90012070	Matrix metalloproteinase-12 levels	NA	European	NA	2020	13100092	21758	NA	NA	NA	NA	Folkersen L	33067605	NA	NA	NA	NA
finn-b-CD2_INSITU_SKIN_FACE_EXALLC	Carcinoma in situ of skin of other and unspecified parts of face (all cancers excluded)	NA	European	Males and Females	2021	16380340	NA	749	180489	Binary	NA	NA	NA	NA	NA	NA	CD2_INSITU_SKIN_FACE_EXALLC
finn-b-H7_LACRIMALSYSTEM	Disorders of lacrimal system	NA	European	Males and Females	2021	16380446	NA	6177	203231	Binary	NA	NA	NA	NA	NA	NA	H7_LACRIMALSYSTEM
ubm-a-172	IDP SWI T2star left pallidum	NA	European	Males	2018	11734354	7778	NA	NA	Continuous	Psychiatric / neurological	Elliott LT	30305740	NA	NA	NA	NA
prot-a-997	Protein EVI2B	NA	European	Males and Females	2018	10534735	3301	NA	NA	Immune system	Protein	Sun BB	29875488	NA	NA	NA	NA
finn-b-CD2_BENIGN_BONE_CARTILAGE_NOS	Benign neoplasm: Bone and articular cartilage, unspecified	NA	European	Males and Females	2021	16380466	NA	92	218700	Binary	NA	NA	NA	NA	NA	NA	CD2_BENIGN_BONE_CARTILAGE_NOS
ukb-a-190	Treatment/medication code: levothyroxine sodium	Neale Lab	European	Males and Females	2017	10894596	337159	13717	323442	NA	NA	Neale	NA	NA	SD	NA	NA
finn-b-ST19_POISO_MEDICI_ADVERSE	Poisoning by medicine, drug-induced	NA	European	Males and Females	2021	16380466	NA	1505	217287	Binary	NA	NA	NA	NA	NA	NA	ST19_POISO_MEDICI_ADVERSE
ubm-a-2144	NET100 0988	NA	European	Males	2018	11734354	7916	NA	NA	Continuous	Psychiatric / neurological	Elliott LT	30305740	NA	NA	NA	NA
prot-a-2447	Receptor-type tyrosine-protein phosphatase R	NA	European	Males and Females	2018	10534735	3301	NA	NA	Immune system	Protein	Sun BB	29875488	NA	NA	NA	NA
ieu-a-820	Multiple sclerosis	IMSGC	European	Males and Females	2007	327095	2793	931	1862	Disease	Autoimmune / inflammatory	Hafler DA	17660530	NA	log odds	NA	Family study; effect allele frequencies are missing
prot-a-3133	PolyUbiquitin K48-linked	NA	European	Males and Females	2018	10534735	3301	NA	NA	Immune system	Protein	Sun BB	29875488	NA	NA	NA	NA
finn-b-G6_MYOPOTHUNS	Other and unspecified myopathies	NA	European	Males and Females	2021	16380463	NA	1162	217056	Binary	NA	NA	NA	NA	NA	NA	G6_MYOPOTHUNS
ukb-d-4968	FI4 : positional arithmetic	NA	European	Males and Females	2018	13567564	115690	98344	17346	Binary	NA	Neale lab	NA	NA	NA	NA	NA
ukb-a-294	Wheeze or whistling in the chest in last year	Neale Lab	European	Males and Females	2017	10894596	331257	68531	262726	NA	NA	Neale	NA	NA	SD	NA	NA
prot-c-2429_27_4	C8	NA	European	Males and Females	2019	501428	NA	NA	NA	Continuous	NA	Suhre K	28240269	EFO_0007937	NA	NA	name=Complement component C8; chr=1|9; start=56854806|136945246; end=56966140|136946974; entrez=731|732|733; uniprot=P07357|P07358|P07360
ubm-a-2781	a2009s lh G temp sup-Plan polar area	NA	European	Males	2018	11734354	8411	NA	NA	Continuous	Psychiatric / neurological	Elliott LT	30305740	NA	NA	NA	NA
prot-c-2523_31_3	RANTES	NA	European	Males and Females	2019	501428	NA	NA	NA	Continuous	NA	Suhre K	28240269	EFO_0007937	NA	NA	name=C-C motif chemokine 5; chr=17; start=35871491; end=35880793; entrez=6352; uniprot=P13501
finn-b-I9_ANEURYSM_EXNONE	"Cerebral aneurysm, nonruptured" (no controls excluded)	NA	European	Males and Females	2021	16380466	NA	992	217800	Binary	NA	NA	NA	NA	NA	NA	I9_ANEURYSM_EXNONE
ubm-a-2088	NET100 0932	NA	European	Males	2018	11734354	7916	NA	NA	Continuous	Psychiatric / neurological	Elliott LT	30305740	NA	NA	NA	NA
prot-a-88	Protein amnionless	NA	European	Males and Females	2018	10534735	3301	NA	NA	Immune system	Protein	Sun BB	29875488	NA	NA	NA	NA
ukb-b-17078	Treatment/medication code: movicol oral powder	MRC-IEU	European	Males and Females	2018	9851867	462933	1441	461492	Binary	NA	Ben Elsworth	NA	NA	SD	NA	20003#1140925800: Output from GWAS pipeline using Phesant derived variables from UKBiobank
finn-b-G6_SPINAMUSCOTH	Other and unspecified spinal muscular atrophies	NA	European	Males and Females	2021	16380466	NA	115	218269	Binary	NA	NA	NA	NA	NA	NA	G6_SPINAMUSCOTH
ukb-b-3725	Operative procedures - secondary OPCS: K63.4 Coronary arteriography using two catheters	MRC-IEU	European	Males and Females	2018	9851867	463010	2735	460275	Binary	NA	Ben Elsworth	NA	NA	SD	NA	41210#K634: Output from GWAS pipeline using Phesant derived variables from UKBiobank
ubm-a-42	IDP T1 FAST ROIs L sup temp gyrus ant	NA	European	Males	2018	11734354	8427	NA	NA	Continuous	Psychiatric / neurological	Elliott LT	30305740	NA	NA	NA	NA
ukb-a-182	Treatment/medication code: symbicort 100/6 turbohaler	Neale Lab	European	Males and Females	2017	10894596	337159	2089	335070	NA	NA	Neale	NA	NA	SD	NA	NA
ubm-a-358	IDP dMRI TBSS L1 Posterior limb of internal capsule R	NA	European	Males	2018	11734354	7532	NA	NA	Continuous	Psychiatric / neurological	Elliott LT	30305740	NA	NA	NA	NA
ubm-a-2340	NET100 1184	NA	European	Males	2018	11734354	7916	NA	NA	Continuous	Psychiatric / neurological	Elliott LT	30305740	NA	NA	NA	NA
ubm-a-2684	volume Right-Accumbens-area	NA	European	Males	2018	11734354	8411	NA	NA	Continuous	Psychiatric / neurological	Elliott LT	30305740	NA	NA	NA	NA
ubm-a-148	IDP T1 FAST ROIs V cerebellum crus II	NA	European	Males	2018	11734354	8427	NA	NA	Continuous	Psychiatric / neurological	Elliott LT	30305740	NA	NA	NA	NA
ukb-b-6727	Methods of discharge from hospital (recoded): Discharged on clinical advice/consent: From inpatient/daycase care	MRC-IEU	European	Males and Females	2018	9851867	462280	22710	439570	Binary	NA	Ben Elsworth	NA	NA	SD	NA	41250#1001: Output from GWAS pipeline using Phesant derived variables from UKBiobank
finn-b-CD2_BENIGN_BONE_SCAPULA_LONG_UPPER_EXALLC	Benign neoplasm: Scapula and long bones of upper limb (all cancers excluded)	NA	European	Males and Females	2021	16380337	NA	125	180657	Binary	NA	NA	NA	NA	NA	NA	CD2_BENIGN_BONE_SCAPULA_LONG_UPPER_EXALLC
ebi-a-GCST90001569	Effector Memory CD4-CD8- T cell Absolute Count	NA	European	NA	2020	15129224	3395	NA	NA	NA	NA	Orr<U+00F9> V	32929287	NA	NA	NA	NA
finn-b-R18_OTHER_ABNORMALITI_PLASMA_PROTEINS	Other abnormalities of plasma proteins	NA	European	Males and Females	2021	16380459	NA	146	212004	Binary	NA	NA	NA	NA	NA	NA	R18_OTHER_ABNORMALITI_PLASMA_PROTEINS
ukb-b-14189	PCT responsible for patient data: EAST LANCASHIRE TEACHING PCT	MRC-IEU	European	Males and Females	2018	9851867	463010	1105	461905	Binary	NA	Ben Elsworth	NA	NA	SD	NA	41229#5NH: Output from GWAS pipeline using Phesant derived variables from UKBiobank
ubm-a-594	IDP dMRI TBSS ISOVF Cerebral peduncle R	NA	European	Males	2018	11734354	7532	NA	NA	Continuous	Psychiatric / neurological	Elliott LT	30305740	NA	NA	NA	NA
ubm-a-2592	NET100 1436	NA	European	Males	2018	11734354	7916	NA	NA	Continuous	Psychiatric / neurological	Elliott LT	30305740	NA	NA	NA	NA
ebi-a-GCST90001876	HVEM on Central Memory CD4+ T cell	NA	European	NA	2020	13730810	1247	NA	NA	NA	NA	Orr<U+00F9> V	32929287	NA	NA	NA	NA
ubm-a-698	IDP dMRI ProbtrackX MO mcp	NA	European	Males	2018	11734354	7532	NA	NA	Continuous	Psychiatric / neurological	Elliott LT	30305740	NA	NA	NA	NA
met-b-223	CD8mem:%"Th2"	NA	European	Females	2015	1625957	497	NA	NA	Immune system	Immune cell subset frequency	Roederer	25772697	NA	%	7.99058	Female twins
prot-a-935	ER membrane protein complex subunit 1	NA	European	Males and Females	2018	10534735	3301	NA	NA	Immune system	Protein	Sun BB	29875488	NA	NA	NA	NA
prot-a-1667	Kallikrein-8	NA	European	Males and Females	2018	10534735	3301	NA	NA	Immune system	Protein	Sun BB	29875488	NA	NA	NA	NA
ubm-a-1530	NET100 0374	NA	European	Males	2018	11734354	7916	NA	NA	Continuous	Psychiatric / neurological	Elliott LT	30305740	NA	NA	NA	NA
ubm-a-2184	NET100 1028	NA	European	Males	2018	11734354	7916	NA	NA	Continuous	Psychiatric / neurological	Elliott LT	30305740	NA	NA	NA	NA
ebi-a-GCST90001884	CD16-CD56 on Natural Killer	NA	European	NA	2020	14903739	3113	NA	NA	NA	NA	Orr<U+00F9> V	32929287	NA	NA	NA	NA
finn-b-D3_HAEMOLYTICANAEMIA	Haemolytic anaemias	NA	European	Males and Females	2021	16380466	NA	396	218396	Binary	NA	NA	NA	NA	NA	NA	D3_HAEMOLYTICANAEMIA
finn-b-CD2_BENIGN_RECTUM_EXALLC	Benign neoplasm: Rectum (all cancers excluded)	NA	European	Males and Females	2021	16380339	NA	2108	179430	Binary	NA	NA	NA	NA	NA	NA	CD2_BENIGN_RECTUM_EXALLC
ukb-a-66	Non-cancer illness code self-reported: asthma	Neale Lab	European	Males and Females	2017	10894596	337159	39049	298110	NA	NA	Neale	NA	NA	SD	NA	NA
ukb-b-3951	Treatment/medication code: gtn 400micrograms spray	MRC-IEU	European	Males and Females	2018	9851867	462933	1091	461842	Binary	NA	Ben Elsworth	NA	NA	SD	NA	20003#1140851812: Output from GWAS pipeline using Phesant derived variables from UKBiobank
ukb-b-7463	Diagnoses - main ICD10: Z46.6 Fitting and adjustment of urinary device	MRC-IEU	European	Males and Females	2018	9851867	463010	2729	460281	Binary	NA	Ben Elsworth	NA	NA	SD	NA	41202#Z466: Output from GWAS pipeline using Phesant derived variables from UKBiobank
ukb-b-20447	Iron	MRC-IEU	European	Males and Females	2018	9851867	64979	NA	NA	Continuous	NA	Ben Elsworth	NA	NA	SD	NA	100011: Output from GWAS pipeline using Phesant derived variables from UKBiobank
ukb-b-9508	Coffee consumed	MRC-IEU	European	Males and Females	2018	9851867	64949	45788	19161	Binary	NA	Ben Elsworth	NA	NA	SD	NA	100240: Output from GWAS pipeline using Phesant derived variables from UKBiobank
met-c-865	Mean diameter for HDL particles	NA	European	Males and Females	2016	11803445	19273	NA	NA	Metabolites	Lipid	Kettunen	27005778	NA	SD	NA	HDL.D
ebi-a-GCST90010253	Myeloblastin levels	NA	European	NA	2020	18221903	1323	NA	NA	NA	NA	Gilly A	33303764	NA	NA	NA	NA
ukb-b-13414	Diagnoses - main ICD10: O02.1 Missed abortion	MRC-IEU	European	Males and Females	2018	9851867	463010	1317	461693	Binary	NA	Ben Elsworth	NA	NA	SD	NA	41202#O021: Output from GWAS pipeline using Phesant derived variables from UKBiobank
prot-a-1948	Mesothelin	NA	European	Males and Females	2018	10534735	3301	NA	NA	Immune system	Protein	Sun BB	29875488	NA	NA	NA	NA
prot-a-1891	MAX gene-associated protein	NA	European	Males and Females	2018	10534735	3301	NA	NA	Immune system	Protein	Sun BB	29875488	NA	NA	NA	NA
prot-c-3387_1_2	PAK3	NA	European	Males and Females	2019	501428	NA	NA	NA	Continuous	NA	Suhre K	28240269	EFO_0007937	NA	NA	name=Serine/threonine-protein kinase PAK 3; chr=X; start=110944285; end=111227361; entrez=5063; uniprot=O75914
ebi-a-GCST90016919	Gut microbiota abundance (class Melainabacteria id.1589)	NA	European	NA	2021	5355624	14306	NA	NA	NA	NA	Kurilshikov A	33462485	NA	NA	NA	NA
ukb-b-4930	Operative procedures - main OPCS: Q11.1 Vacuum aspiration of products of conception from uterus NEC	MRC-IEU	European	Males and Females	2018	9851867	463010	1492	461518	Binary	NA	Ben Elsworth	NA	NA	SD	NA	41200#Q111: Output from GWAS pipeline using Phesant derived variables from UKBiobank
prot-a-3049	Tumor necrosis factor receptor superfamily member 21	NA	European	Males and Females	2018	10534735	3301	NA	NA	Immune system	Protein	Sun BB	29875488	NA	NA	NA	NA
ebi-a-GCST90011411	OTU97_74 (Alistipes) abundance	NA	European	NA	2021	5445621	8956	NA	NA	NA	NA	R<U+00FC>hlemann MC	33462482	NA	NA	NA	NA
ubm-a-1196	NET100 0040	NA	European	Males	2018	11734354	7916	NA	NA	Continuous	Psychiatric / neurological	Elliott LT	30305740	NA	NA	NA	NA
ubm-a-121	IDP T1 FAST ROIs R occ pole	NA	European	Males	2018	11734354	8427	NA	NA	Continuous	Psychiatric / neurological	Elliott LT	30305740	NA	NA	NA	NA
met-a-357	Biliverdin	NA	European	Males and Females	2014	2544635	6686	NA	NA	Metabolites	Cofactors and vitamins	Shin	24816252	NA	log10 units	0.197007	NA
prot-c-3043_49_2	ON	NA	European	Males and Females	2019	501428	NA	NA	NA	Continuous	NA	Suhre K	28240269	EFO_0007937	NA	NA	name=SPARC; chr=5; start=151661096; end=151687165; entrez=6678; uniprot=P09486
prot-b-63	heparin binding EGF like growth factor	NA	European	Males and Females	2018	5270646	3394	NA	NA	Immune system	Protein	Folkersen L	28369058	NA	NA	NA	NA
prot-a-660	Cysteine-rich motor neuron 1 protein	NA	European	Males and Females	2018	10534735	3301	NA	NA	Immune system	Protein	Sun BB	29875488	NA	NA	NA	NA
ebi-a-GCST005848	Heart rate response to recovery post exercise (50 sec)	NA	European	NA	2018	14615800	54137	NA	NA	NA	NA	Verweij N	29497042	NA	NA	NA	NA
finn-b-H8_MASTACU	Acute mastoiditis	NA	European	Males and Females	2021	16380415	NA	132	205939	Binary	NA	NA	NA	NA	NA	NA	H8_MASTACU
ubm-a-386	IDP dMRI TBSS L1 Tapetum R	NA	European	Males	2018	11734354	7532	NA	NA	Continuous	Psychiatric / neurological	Elliott LT	30305740	NA	NA	NA	NA
met-a-678	Pro-hydroxy-pro	NA	European	Males and Females	2014	2545647	7787	NA	NA	Metabolites	Peptide	Shin	24816252	NA	log10 units	0.156705	NA
ebi-a-GCST90016981	Gut microbiota abundance (genus Collinsella id.815)	NA	European	NA	2021	5563963	14306	NA	NA	NA	NA	Kurilshikov A	33462485	NA	NA	NA	NA
ieu-b-42	schizophrenia	Schizophrenia Working Group of the Psychiatric Genomics Consortium	European	Males and Females	2014	15358497	77096	33640	43456	Binary	Psychiatric / neurological	Ripke, S	25056061	NA	NA	NA	NA
ebi-a-GCST90017114	Gut microbiota abundance (phylum Firmicutes id.1672)	NA	European	NA	2021	5729268	14306	NA	NA	NA	NA	Kurilshikov A	33462485	NA	NA	NA	NA
ukb-b-645	6mm strong meridian (left)	MRC-IEU	European	Males and Females	2018	9851867	83410	NA	NA	Continuous	NA	Ben Elsworth	NA	NA	SD	NA	5134: Output from GWAS pipeline using Phesant derived variables from UKBiobank
ebi-a-GCST90002019	CD14 on Monocytic Myeloid-Derived Suppressor Cells	NA	European	NA	2020	14120805	1570	NA	NA	NA	NA	Orr<U+00F9> V	32929287	NA	NA	NA	NA
prot-c-4280_47_2	PSA2	NA	European	Males and Females	2019	501428	NA	NA	NA	Continuous	NA	Suhre K	28240269	EFO_0007937	NA	NA	name=Proteasome subunit alpha type-2; chr=7; start=42909273; end=42932223; entrez=5683; uniprot=P25787
prot-a-3098	Triggering receptor expressed on myeloid cells 1	NA	European	Males and Females	2018	10534735	3301	NA	NA	Immune system	Protein	Sun BB	29875488	NA	NA	NA	NA
finn-b-E4_OBESITYCAL	Obesity due to excess calories	NA	European	Males and Females	2021	16380461	NA	5883	209884	Binary	NA	NA	NA	NA	NA	NA	E4_OBESITYCAL
finn-b-AB1_STREPTO_SEPSIS	Streptococcal septicaemia	NA	European	Males and Females	2021	16380403	NA	1090	197660	Binary	NA	NA	NA	NA	NA	NA	AB1_STREPTO_SEPSIS
ubm-a-968	NET25 0022	NA	European	Males	2018	11734354	7916	NA	NA	Continuous	Psychiatric / neurological	Elliott LT	30305740	NA	NA	NA	NA
ebi-a-GCST011075	COVID-19 (very severe respiratory confirmed vs population) RELEASE 5	NA	European	NA	2020	9739225	1388342	5101	1383241	NA	NA	COVID-19 Host Genetics Initiative	32404885	NA	NA	NA	NA
ukb-d-22607_1	Workplace very cold: Sometimes	NA	European	Males and Females	2018	13566907	90500	42823	47677	Binary	NA	Neale lab	NA	NA	NA	NA	NA
ukb-b-12383	PCT responsible for patient data: LAMBETH PCT	MRC-IEU	European	Males and Females	2018	9851867	463010	1047	461963	Binary	NA	Ben Elsworth	NA	NA	SD	NA	41229#5LD: Output from GWAS pipeline using Phesant derived variables from UKBiobank
finn-b-VWXY20_TYPE_ACCIDENT	Type of accident	NA	European	Males and Females	2021	16380464	NA	161	218339	Binary	NA	NA	NA	NA	NA	NA	VWXY20_TYPE_ACCIDENT
prot-a-1155	Alpha-(1,3)-fucosyltransferase 9	NA	European	Males and Females	2018	10534735	3301	NA	NA	Immune system	Protein	Sun BB	29875488	NA	NA	NA	NA
ubm-a-2800	a2009s lh S front sup area	NA	European	Males	2018	11734354	8411	NA	NA	Continuous	Psychiatric / neurological	Elliott LT	30305740	NA	NA	NA	NA
ukb-d-C78	Diagnoses - main ICD10: C78 Secondary malignant neoplasm of respiratory and digestive organs	NA	European	Males and Females	2018	10080950	361194	1378	359816	Binary	NA	Neale lab	NA	NA	NA	NA	NA
finn-b-J10_BRONCH	Bronchitis, not specified as acute or chronic	NA	European	Males and Females	2021	16380367	NA	1533	186723	Binary	NA	NA	NA	NA	NA	NA	J10_BRONCH
ukb-b-17738	Fractured bone site(s): Other bones	MRC-IEU	European	Males and Females	2018	9851867	460340	24060	436280	Binary	NA	Ben Elsworth	NA	NA	SD	NA	6151#7: Output from GWAS pipeline using Phesant derived variables from UKBiobank
ukb-a-319	Age at first live birth	Neale Lab	European	Males and Females	2017	10894596	123846	NA	NA	NA	NA	Neale	NA	NA	SD	NA	NA
prot-c-3034_1_2	GFAP	NA	European	Males and Females	2019	501428	NA	NA	NA	Continuous	NA	Suhre K	28240269	EFO_0007937	NA	NA	name=Glial fibrillary acidic protein; chr=17; start=44905008; end=44916937; entrez=2670; uniprot=P14136
prot-a-1850	Mitogen-activated protein kinase 9	NA	European	Males and Females	2018	10534735	3301	NA	NA	Immune system	Protein	Sun BB	29875488	NA	NA	NA	NA
prot-a-3214	Vitronectin	NA	European	Males and Females	2018	10534735	3301	NA	NA	Immune system	Protein	Sun BB	29875488	NA	NA	NA	NA
finn-b-CD2_INSITU_SKIN_TRUNK_EXALLC	Carcinoma in situ of skin of trunk (all cancers excluded)	NA	European	Males and Females	2021	16380337	NA	228	180692	Binary	NA	NA	NA	NA	NA	NA	CD2_INSITU_SKIN_TRUNK_EXALLC
ubm-a-669	IDP dMRI ProbtrackX MD ilf l	NA	European	Males	2018	11734354	7532	NA	NA	Continuous	Psychiatric / neurological	Elliott LT	30305740	NA	NA	NA	NA
ebi-a-GCST90011528	TestASV_5 (Bacteroides) abundance	NA	European	NA	2021	5490454	8956	NA	NA	NA	NA	R<U+00FC>hlemann MC	33462482	NA	NA	NA	NA
prot-a-1502	Interleukin-1 receptor-like 1	NA	European	Males and Females	2018	10534735	3301	NA	NA	Immune system	Protein	Sun BB	29875488	NA	NA	NA	NA
prot-b-51	cathepsin D	NA	European	Males and Females	2018	5270646	3394	NA	NA	Immune system	Protein	Folkersen L	28369058	NA	NA	NA	NA
finn-b-M13_DEFORMACQ	Other acquired deformities of musculoskeletal system and connective tissue	NA	European	Males and Females	2021	16380441	NA	687	216813	Binary	NA	NA	NA	NA	NA	NA	M13_DEFORMACQ
ukb-a-350	Duration of other exercises	Neale Lab	European	Males and Females	2017	10894596	161301	NA	NA	NA	NA	Neale	NA	NA	SD	NA	NA
prot-c-5337_64_3	B7-2	NA	European	Males and Females	2019	501428	NA	NA	NA	Continuous	NA	Suhre K	28240269	EFO_0007937	NA	NA	name=T-lymphocyte activation antigen CD86; chr=3; start=122055366; end=122121139; entrez=942; uniprot=P42081
finn-b-I9_CABG	Coronary artery bypass grafting	NA	European	Males and Females	2021	16380375	NA	5779	187840	Binary	NA	NA	NA	NA	NA	NA	I9_CABG
finn-b-H7_OCUMUSCLE	Disorders of ocular muscles, binocular movement, accommodation and refraction	NA	European	Males and Females	2021	16380466	NA	7861	210931	Binary	NA	NA	NA	NA	NA	NA	H7_OCUMUSCLE
prot-a-2558	Ribonuclease H1	NA	European	Males and Females	2018	10534735	3301	NA	NA	Immune system	Protein	Sun BB	29875488	NA	NA	NA	NA
ebi-a-GCST90012080	Follistatin levels	NA	European	NA	2020	13022208	21758	NA	NA	NA	NA	Folkersen L	33067605	NA	NA	NA	NA
ebi-a-GCST90010321	Kynurenine-oxoglutarate transaminase 1 levels	NA	European	NA	2020	18197903	1313	NA	NA	NA	NA	Gilly A	33303764	NA	NA	NA	NA
prot-c-2668_70_2	Calpain I	NA	European	Males and Females	2019	501428	NA	NA	NA	Continuous	NA	Suhre K	28240269	EFO_0007937	NA	NA	name=Calpain I; chr=11|19; start=65180566|36139575; end=65212006|36150353; entrez=823|826; uniprot=P07384|P04632
met-d-S_LDL_C	Cholesterol in small LDL	NA	European	Males and Females	2020	12321875	115078	NA	NA	Continuous	NA	Borges CM	NA	NA	NA	NA	NA
ieu-a-1126	Breast cancer (Combined Oncoarray; iCOGS; GWAS meta analysis)	BCAC	European	Females	2017	10680257	228951	122977	105974	Disease	Cancer	Michailidou K	29059683	NA	log odds	NA	NA
ebi-a-GCST90002087	CD11c on myeloid Dendritic Cell	NA	European	NA	2020	14829776	2872	NA	NA	NA	NA	Orr<U+00F9> V	32929287	NA	NA	NA	NA
prot-a-2049	Nidogen-1	NA	European	Males and Females	2018	10534735	3301	NA	NA	Immune system	Protein	Sun BB	29875488	NA	NA	NA	NA
prot-a-1733	Leucine-rich repeat LGI family member 3	NA	European	Males and Females	2018	10534735	3301	NA	NA	Immune system	Protein	Sun BB	29875488	NA	NA	NA	NA
prot-a-401	C-C motif chemokine 24	NA	European	Males and Females	2018	10534735	3301	NA	NA	Immune system	Protein	Sun BB	29875488	NA	NA	NA	NA
ebi-a-GCST90001860	CD3 on CD39+ CD4+ T cell	NA	European	NA	2020	14849624	2919	NA	NA	NA	NA	Orr<U+00F9> V	32929287	NA	NA	NA	NA
ebi-a-GCST90000026	Appendicular lean mass	NA	European	NA	2020	18164071	205513	NA	NA	NA	NA	Pei YF	33097823	NA	NA	NA	NA
prot-a-1790	Leucine-rich repeat-containing protein 74A	NA	European	Males and Females	2018	10534735	3301	NA	NA	Immune system	Protein	Sun BB	29875488	NA	NA	NA	NA
ebi-a-GCST90017081	Gut microbiota abundance (unknown genus id.1868)	NA	European	NA	2021	5493572	14306	NA	NA	NA	NA	Kurilshikov A	33462485	NA	NA	NA	NA
ebi-a-GCST90011703	TestASV_29 (Barnesiella) prevalence	NA	European	NA	2021	5356641	8956	NA	NA	NA	NA	R<U+00FC>hlemann MC	33462482	NA	NA	NA	NA
finn-b-CD2_INSITU_CERVIX_UTERI_NOS	Carcinoma in situ of uteri, other/unspecified	NA	European	Males and Females	2021	16379784	NA	109	123470	Binary	NA	NA	NA	NA	NA	NA	CD2_INSITU_CERVIX_UTERI_NOS
finn-b-I9_OTHPER	Other peripheral vascular diseases	NA	European	Males and Females	2021	16380415	NA	1037	206541	Binary	NA	NA	NA	NA	NA	NA	I9_OTHPER
ubm-a-1949	NET100 0793	NA	European	Males	2018	11734354	7916	NA	NA	Continuous	Psychiatric / neurological	Elliott LT	30305740	NA	NA	NA	NA
met-b-238	NKeff:%Act(335+)	NA	European	Females	2015	1623131	497	NA	NA	Immune system	Immune cell subset frequency	Roederer	25772697	NA	%	17.1126	Female twins
ieu-b-4842	HbA1c	Within family GWAS consortium	European	Males and Females	2022	9696819	45734	NA	NA	NA	NA	Howe LJ	NA	EFO:0004541	NA	NA	Population estimate
finn-b-DENTAL_TMD	TMD related pain	NA	European	Males and Females	2021	16380466	NA	4728	214064	Binary	NA	NA	NA	NA	NA	NA	DENTAL_TMD
prot-a-2010	Nucleolin	NA	European	Males and Females	2018	10534735	3301	NA	NA	Immune system	Protein	Sun BB	29875488	NA	NA	NA	NA
prot-a-567	Galectin-10	NA	European	Males and Females	2018	10534735	3301	NA	NA	Immune system	Protein	Sun BB	29875488	NA	NA	NA	NA
prot-a-848	DnaJ homolog subfamily C member 27	NA	European	Males and Females	2018	10534735	3301	NA	NA	Immune system	Protein	Sun BB	29875488	NA	NA	NA	NA
prot-a-2998	Transmembrane protein 132B	NA	European	Males and Females	2018	10534735	3301	NA	NA	Immune system	Protein	Sun BB	29875488	NA	NA	NA	NA
ebi-a-GCST90000498	Transforming growth factor-alpha levels	NA	European	NA	2020	7883861	982	NA	NA	NA	NA	Hillary RF	32641083	NA	NA	NA	NA
finn-b-AB1_SEXUAL_TRANSMISSION	Infections with a predominantly sexual mode of transmission	NA	European	Males and Females	2021	16380466	NA	5840	212952	Binary	NA	NA	NA	NA	NA	NA	AB1_SEXUAL_TRANSMISSION
prot-a-888	Tumor necrosis factor receptor superfamily member EDAR	NA	European	Males and Females	2018	10534735	3301	NA	NA	Immune system	Protein	Sun BB	29875488	NA	NA	NA	NA
prot-a-1125	Leucine-rich repeat transmembrane protein FLRT3	NA	European	Males and Females	2018	10534735	3301	NA	NA	Immune system	Protein	Sun BB	29875488	NA	NA	NA	NA
ukb-b-11285	Sources of admission to hospital (recoded): Temporary place of residence	MRC-IEU	European	Males and Females	2018	9851867	461380	1751	459629	Binary	NA	Ben Elsworth	NA	NA	SD	NA	41251#2000: Output from GWAS pipeline using Phesant derived variables from UKBiobank
prot-c-2833_20_1	Kallikrein 4	NA	European	Males and Females	2019	501428	NA	NA	NA	Continuous	NA	Suhre K	28240269	EFO_0007937	NA	NA	name=Kallikrein-4; chr=19; start=50906352; end=50910738; entrez=9622; uniprot=Q9Y5K2
ebi-a-GCST007432	FEV1	NA	European	NA	2019	19674931	321047	NA	NA	NA	NA	Shrine N	30804560	NA	NA	NA	NA
ubm-a-2413	NET100 1257	NA	European	Males	2018	11734354	7916	NA	NA	Continuous	Psychiatric / neurological	Elliott LT	30305740	NA	NA	NA	NA
ieu-a-816	Neuroblastoma	NA	European	Males and Females	2013	468788	4881	1627	3254	Disease	Cancer	Capasso M	23222812	NA	log odds	NA	Effect allele frequencies are missing
finn-b-MND	Motor neuron disease (with DMD)	NA	European	Males and Females	2021	16379396	NA	234	111621	Binary	NA	NA	NA	NA	NA	NA	MND
finn-b-D3_ANAEMIA_IRONDEF_NAS	Other and unspecified iron deficiency	NA	European	Males and Females	2021	16380456	NA	4321	211115	Binary	NA	NA	NA	NA	NA	NA	D3_ANAEMIA_IRONDEF_NAS
ukb-b-16671	Attendance/disability/mobility allowance: Attendance allowance	MRC-IEU	European	Males and Females	2018	9851867	459354	3316	456038	Binary	NA	Ben Elsworth	NA	NA	SD	NA	6146#1: Output from GWAS pipeline using Phesant derived variables from UKBiobank
finn-b-R18_ABNORMALITI_GAIT_MOBIL	Abnormalities of gait and mobility	NA	European	Males and Females	2021	16380444	NA	1348	209369	Binary	NA	NA	NA	NA	NA	NA	R18_ABNORMALITI_GAIT_MOBIL
ebi-a-GCST005528	Juvenile idiopathic arthritis (oligoarticular or rheumatoid factor-negative polyarticular)	NA	European	NA	2013	103767	15872	2816	13056	NA	NA	Hinks A	23603761	NA	logOR	NA	beta+se converted from OR+CI;
ukb-a-540	Diagnoses - main ICD10: J22 Unspecified acute lower respiratory infection	Neale Lab	European	Males and Females	2017	10894596	337199	1992	335207	NA	NA	Neale	NA	NA	SD	NA	NA
ubm-a-3116	a2009s rh S front inf thickness	NA	European	Males	2018	11734354	8411	NA	NA	Continuous	Psychiatric / neurological	Elliott LT	30305740	NA	NA	NA	NA
prot-c-5489_18_3	Stress-induced-phosphoprotein 1	NA	European	Males and Females	2019	501428	NA	NA	NA	Continuous	NA	Suhre K	28240269	EFO_0007937	NA	NA	name=Stress-induced-phosphoprotein 1; chr=11; start=64185272; end=64204543; entrez=10963; uniprot=P31948
prot-a-2061	Normal mucosa of esophagus-specific gene 1 protein	NA	European	Males and Females	2018	10534735	3301	NA	NA	Immune system	Protein	Sun BB	29875488	NA	NA	NA	NA
prot-c-5358_3_3	OMD	NA	European	Males and Females	2019	501428	NA	NA	NA	Continuous	NA	Suhre K	28240269	EFO_0007937	NA	NA	name=Osteomodulin; chr=9; start=92414245; end=92424461; entrez=4958; uniprot=Q99983
ubm-a-1609	NET100 0453	NA	European	Males	2018	11734354	7916	NA	NA	Continuous	Psychiatric / neurological	Elliott LT	30305740	NA	NA	NA	NA
ukb-b-6721	Diagnoses - main ICD10: K60.3 Anal fistula	MRC-IEU	European	Males and Females	2018	9851867	463010	1003	462007	Binary	NA	Ben Elsworth	NA	NA	SD	NA	41202#K603: Output from GWAS pipeline using Phesant derived variables from UKBiobank
met-c-918	Phosphatidylcholine and other cholines	NA	European	Males and Females	2016	11419086	13542	NA	NA	Metabolites	Lipid	Kettunen	27005778	NA	SD	NA	PC
ubm-a-6	IDP T1 SIENAX grey unnormalised volume	NA	European	Males	2018	11734354	8428	NA	NA	Continuous	Psychiatric / neurological	Elliott LT	30305740	NA	NA	NA	NA
ieu-a-1016	Oligoclonal band status	NA	European	Males and Females	2015	485523	3026	363	2663	Risk factor	Immune system	Goris A	25616667	NA	log odds	NA	All subjects had multiple sclerosis; effect allele frequeinces are missing
finn-b-I9_PHLETHROMBDVTLOW	DVT of lower extremities	NA	European	Males and Females	2021	16380409	NA	4576	190028	Binary	NA	NA	NA	NA	NA	NA	I9_PHLETHROMBDVTLOW
met-c-943	Cholesterol esters in very large HDL	NA	European	Males and Females	2016	11806428	19273	NA	NA	Metabolites	Lipid	Kettunen	27005778	NA	SD	NA	XL.HDL.CE
met-d-S_HDL_TG	Triglycerides in small HDL	NA	European	Males and Females	2020	12321875	115078	NA	NA	Continuous	NA	Borges CM	NA	NA	NA	NA	NA
met-a-625	10-heptadecenoate (17:1n7)	NA	European	Males and Females	2014	2545657	7795	NA	NA	Metabolites	Fatty acid	Shin	24816252	NA	log10 units	0.187124	NA
prot-a-811	Diacylglycerol kinase beta	NA	European	Males and Females	2018	10534735	3301	NA	NA	Immune system	Protein	Sun BB	29875488	NA	NA	NA	NA
finn-b-D3_BLOODOTHER	Other diseases of blood and blood-forming organs	NA	European	Males and Females	2021	16380466	NA	3037	215755	Binary	NA	NA	NA	NA	NA	NA	D3_BLOODOTHER
ukb-b-4070	Apple intake	MRC-IEU	European	Males and Females	2018	9851867	64949	NA	NA	Categorical Ordered	NA	Ben Elsworth	NA	NA	SD	NA	104450: Output from GWAS pipeline using Phesant derived variables from UKBiobank
finn-b-L12_OTHERBULL	Other and unspecified bullous disorders	NA	European	Males and Females	2021	16380466	NA	107	218066	Binary	NA	NA	NA	NA	NA	NA	L12_OTHERBULL
finn-b-I9_SEQULAE_EXNONE	Sequelae of cerebrovascular disease (no controls excluded)	NA	European	Males and Females	2021	16380466	NA	4638	214154	Binary	NA	NA	NA	NA	NA	NA	I9_SEQULAE_EXNONE
ubm-a-1952	NET100 0796	NA	European	Males	2018	11734354	7916	NA	NA	Continuous	Psychiatric / neurological	Elliott LT	30305740	NA	NA	NA	NA
prot-c-4184_43_3	4EBP2	NA	European	Males and Females	2019	501428	NA	NA	NA	Continuous	NA	Suhre K	28240269	EFO_0007937	NA	NA	name=Eukaryotic translation initiation factor 4E-binding protein 2; chr=10; start=70404379; end=70428618; entrez=1979; uniprot=Q13542
prot-a-1716	L-lactate dehydrogenase C chain	NA	European	Males and Females	2018	10534735	3301	NA	NA	Immune system	Protein	Sun BB	29875488	NA	NA	NA	NA
ubm-a-725	IDP dMRI ProbtrackX L1 mcp	NA	European	Males	2018	11734354	7532	NA	NA	Continuous	Psychiatric / neurological	Elliott LT	30305740	NA	NA	NA	NA
prot-c-3053_49_2	Flt3 ligand	NA	European	Males and Females	2019	501428	NA	NA	NA	Continuous	NA	Suhre K	28240269	EFO_0007937	NA	NA	name=Fms-related tyrosine kinase 3 ligand; chr=19; start=49474207; end=49486231; entrez=2323; uniprot=P49771
finn-b-I9_PULMOTHHD	Other pulmonary heart/vessel disease	NA	European	Males and Females	2021	16380459	NA	493	214228	Binary	NA	NA	NA	NA	NA	NA	I9_PULMOTHHD
ebi-a-GCST008403	Arterial stiffness index	NA	European	NA	2019	9342319	127121	NA	NA	NA	NA	Fung K	31235810	NA	NA	NA	NA
finn-b-H8_EXT_NAS	Otitis externa, unspecified	NA	European	Males and Females	2021	16380442	NA	1263	214100	Binary	NA	NA	NA	NA	NA	NA	H8_EXT_NAS
finn-b-ST19_POST_TRAU_WOUND_INFECTION_NOT_ELSEW_CLASSIFIED	Post-traumatic wound infection, not elsewhere classified	NA	European	Males and Females	2021	16380466	NA	271	218275	Binary	NA	NA	NA	NA	NA	NA	ST19_POST_TRAU_WOUND_INFECTION_NOT_ELSEW_CLASSIFIED
finn-b-M13_CALCANSPUR	Calcaneal spur	NA	European	Males and Females	2021	16380306	NA	157	167641	Binary	NA	NA	NA	NA	NA	NA	M13_CALCANSPUR
prot-a-1631	UPF0577 protein KIAA1324	NA	European	Males and Females	2018	10534735	3301	NA	NA	Immune system	Protein	Sun BB	29875488	NA	NA	NA	NA
finn-b-FG_CEREBVASC	Cerebrovascular diseases (FINNGEN)	NA	European	Males and Females	2021	16380466	NA	13700	205092	Binary	NA	NA	NA	NA	NA	NA	FG_CEREBVASC
ukb-d-M13_ARTHROSIS	#Arthrosis	NA	European	Males and Females	2018	13586589	361194	24977	336217	Binary	NA	Neale lab	NA	NA	NA	NA	NA
prot-a-1350	SWI/SNF-related matrix-associated actin-dependent regulator of chromatin subfamily E member 1-related	NA	European	Males and Females	2018	10534735	3301	NA	NA	Immune system	Protein	Sun BB	29875488	NA	NA	NA	NA
finn-b-CD2_BENIGN_LIPOMATOUS_EXALLC	Benign lipomatous neoplasm (all cancers excluded)	NA	European	Males and Females	2021	16380339	NA	4870	177107	Binary	NA	NA	NA	NA	NA	NA	CD2_BENIGN_LIPOMATOUS_EXALLC
ubm-a-2040	NET100 0884	NA	European	Males	2018	11734354	7916	NA	NA	Continuous	Psychiatric / neurological	Elliott LT	30305740	NA	NA	NA	NA
ubm-a-836	IDP dMRI ProbtrackX OD ptr l	NA	European	Males	2018	11734354	7532	NA	NA	Continuous	Psychiatric / neurological	Elliott LT	30305740	NA	NA	NA	NA
ukb-b-18023	Diagnoses - secondary ICD10: Z87.3 Personal history of diseases of the musculoskeletal system and connective tissue	MRC-IEU	European	Males and Females	2018	9851867	463010	1285	461725	Binary	NA	Ben Elsworth	NA	NA	SD	NA	41204#Z873: Output from GWAS pipeline using Phesant derived variables from UKBiobank
ebi-a-GCST006465	Endometrial cancer (endometrioid histology)	NA	European	NA	2018	9464330	54884	8758	46126	NA	NA	O'Mara TA	30093612	NA	NA	NA	NA
finn-b-E4_HYTHYPOSTINF	Postinfectious hypothyroidism	NA	European	Males and Females	2021	16380359	NA	90	187684	Binary	NA	NA	NA	NA	NA	NA	E4_HYTHYPOSTINF
ubm-a-530	IDP dMRI TBSS ICVF Tapetum R	NA	European	Males	2018	11734354	7532	NA	NA	Continuous	Psychiatric / neurological	Elliott LT	30305740	NA	NA	NA	NA
prot-a-2608	Retbindin	NA	European	Males and Females	2018	10534735	3301	NA	NA	Immune system	Protein	Sun BB	29875488	NA	NA	NA	NA
ebi-a-GCST90001474	Plasmacytoid Dendritic Cell %Dendritic Cell	NA	European	NA	2020	15143298	3410	NA	NA	NA	NA	Orr<U+00F9> V	32929287	NA	NA	NA	NA
ieu-a-1033	Height	EGG	European	Males	2013	2500338	6986	NA	NA	Risk factor	Anthropometric	Cousminer	23449627	NA	SD	NA	Age 12; effect allele frequencies are missing
prot-a-1804	Leukotriene A-4 hydrolase	NA	European	Males and Females	2018	10534735	3301	NA	NA	Immune system	Protein	Sun BB	29875488	NA	NA	NA	NA
met-d-non_HDL_C	Total cholesterol minus HDL-C	NA	European	Males and Females	2020	12321875	115078	NA	NA	Continuous	NA	Borges CM	NA	NA	NA	NA	NA
prot-a-1564	Insulin receptor	NA	European	Males and Females	2018	10534735	3301	NA	NA	Immune system	Protein	Sun BB	29875488	NA	NA	NA	NA
met-a-658	X-12776	NA	European	Males and Females	2014	2545673	7764	NA	NA	Metabolites	Unknown metabolite	Shin	24816252	NA	log10 units	0.0579018	NA
ukb-b-752	Operative procedures - main OPCS: H20.2 Fibreoptic endoscopic cauterisation of lesion of colon	MRC-IEU	European	Males and Females	2018	9851867	463010	1899	461111	Binary	NA	Ben Elsworth	NA	NA	SD	NA	41200#H202: Output from GWAS pipeline using Phesant derived variables from UKBiobank
prot-c-2962_50_2	PTHrP	NA	European	Males and Females	2019	501428	NA	NA	NA	Continuous	NA	Suhre K	28240269	EFO_0007937	NA	NA	name=Parathyroid hormone-related protein; chr=12; start=27958084; end=27972705; entrez=5744; uniprot=P12272
ukb-b-12069	PCT where patients GP was registered: TAMESIDE AND GLOSSOP PCT	MRC-IEU	European	Males and Females	2018	9851867	463010	1836	461174	Binary	NA	Ben Elsworth	NA	NA	SD	NA	41230#5LH: Output from GWAS pipeline using Phesant derived variables from UKBiobank
met-a-445	1-linoleoylglycerol (1-monolinolein)	NA	European	Males and Females	2014	2545660	2797	NA	NA	Metabolites	Lipid	Shin	24816252	NA	log10 units	0.229871	NA
ukb-b-18137	PCT where patients GP was registered: REDCAR AND CLEVELAND PCT	MRC-IEU	European	Males and Females	2018	9851867	463010	1648	461362	Binary	NA	Ben Elsworth	NA	NA	SD	NA	41230#5QR: Output from GWAS pipeline using Phesant derived variables from UKBiobank
ubm-a-975	NET25 0029	NA	European	Males	2018	11734354	7916	NA	NA	Continuous	Psychiatric / neurological	Elliott LT	30305740	NA	NA	NA	NA
met-d-M_HDL_PL	Phospholipids in medium HDL	NA	European	Males and Females	2020	12321875	115078	NA	NA	Continuous	NA	Borges CM	NA	NA	NA	NA	NA
ebi-a-GCST90011716	TestASV_40 (Barnesiella) prevalence	NA	European	NA	2021	5356641	8956	NA	NA	NA	NA	R<U+00FC>hlemann MC	33462482	NA	NA	NA	NA
met-c-935	Sphingomyelins	NA	European	Males and Females	2016	11417530	13476	NA	NA	Metabolites	Lipid	Kettunen	27005778	NA	SD	NA	SM
prot-a-503	Carcinoembryonic antigen-related cell adhesion molecule 21	NA	European	Males and Females	2018	10534735	3301	NA	NA	Immune system	Protein	Sun BB	29875488	NA	NA	NA	NA
ieu-b-4860	Physical activity	Within family GWAS consortium	European	Males and Females	2022	7987378	78007	NA	NA	NA	NA	Howe LJ	NA	EFO:0008002	NA	NA	Population estimate
ukb-b-18009	Medication for cholesterol, blood pressure, diabetes, or take exogenous hormones: Blood pressure medication	MRC-IEU	European	Males and Females	2018	9851867	249710	43244	206466	Binary	NA	Ben Elsworth	NA	NA	SD	NA	6153#2: Output from GWAS pipeline using Phesant derived variables from UKBiobank
prot-a-2407	Pregnancy-specific beta-1-glycoprotein 8	NA	European	Males and Females	2018	10534735	3301	NA	NA	Immune system	Protein	Sun BB	29875488	NA	NA	NA	NA
ubm-a-1951	NET100 0795	NA	European	Males	2018	11734354	7916	NA	NA	Continuous	Psychiatric / neurological	Elliott LT	30305740	NA	NA	NA	NA
ubm-a-194	IDP tfMRI median zstat faces-shapes amygdala	NA	European	Males	2018	11734354	7612	NA	NA	Continuous	Psychiatric / neurological	Elliott LT	30305740	NA	NA	NA	NA
prot-c-4330_4_2	PSA	NA	European	Males and Females	2019	501428	NA	NA	NA	Continuous	NA	Suhre K	28240269	EFO_0007937	NA	NA	name=Prostate-specific antigen; chr=19; start=50854915; end=50860764; entrez=354; uniprot=P07288
ebi-a-GCST90000288	Myocardial fractal dimension (slice 2)	NA	European	NA	2020	13261814	18096	NA	NA	NA	NA	Meyer HV	32814899	NA	NA	NA	NA
prot-c-4129_72_1	Factor B	NA	European	Males and Females	2019	501428	NA	NA	NA	Continuous	NA	Suhre K	28240269	EFO_0007937	NA	NA	name=Complement factor B; chr=6; start=31927837; end=32028527; entrez=629; uniprot=P00751
finn-b-CD2_IMMUNOPROLIFERATIVE	Malignant immunoproliferative diseases	NA	European	Males and Females	2021	16380466	NA	105	218687	Binary	NA	NA	NA	NA	NA	NA	CD2_IMMUNOPROLIFERATIVE
prot-c-4137_57_2	IL-17E	NA	European	Males and Females	2019	501428	NA	NA	NA	Continuous	NA	Suhre K	28240269	EFO_0007937	NA	NA	name=Interleukin-25; chr=14; start=23372809; end=23376403; entrez=64806; uniprot=Q9H293
ebi-a-GCST90007324	circulating leptin levels adjusted for BMI	NA	European	NA	2020	191965	27947	NA	NA	NA	NA	Yaghootkar H	32917775	NA	NA	NA	NA
ubm-a-2379	NET100 1223	NA	European	Males	2018	11734354	7916	NA	NA	Continuous	Psychiatric / neurological	Elliott LT	30305740	NA	NA	NA	NA
ebi-a-GCST90001602	Lymphocyte %leukocyte	NA	European	NA	2020	15198020	3669	NA	NA	NA	NA	Orr<U+00F9> V	32929287	NA	NA	NA	NA
met-a-324	Threonine	NA	European	Males and Females	2014	2545896	6020	NA	NA	Metabolites	Amino acid	Shin	24816252	NA	log10 units	0.116675	NA
ukb-a-462	Vitamin and mineral supplements: Vitamin D	Neale Lab	European	Males and Females	2017	10894596	335591	12510	323081	NA	NA	Neale	NA	NA	SD	NA	NA
prot-a-420	CD177 antigen	NA	European	Males and Females	2018	10534735	3301	NA	NA	Immune system	Protein	Sun BB	29875488	NA	NA	NA	NA
ubm-a-1112	NET25 0166	NA	European	Males	2018	11734354	7916	NA	NA	Continuous	Psychiatric / neurological	Elliott LT	30305740	NA	NA	NA	NA
ieu-b-4808	25 hydroxyvitamin D level	NA	European	Males and Females	2020	16668957	441291	NA	NA	NA	NA	Manousaki et al.	NA	NA	NA	NA	NA
prot-a-2397	Proactivator polypeptide-like 1	NA	European	Males and Females	2018	10534735	3301	NA	NA	Immune system	Protein	Sun BB	29875488	NA	NA	NA	NA
prot-a-32	A disintegrin and metalloproteinase with thrombospondin motifs 13	NA	European	Males and Females	2018	10534735	3301	NA	NA	Immune system	Protein	Sun BB	29875488	NA	NA	NA	NA
prot-a-1281	GrpE protein homolog 1, mitochondrial	NA	European	Males and Females	2018	10534735	3301	NA	NA	Immune system	Protein	Sun BB	29875488	NA	NA	NA	NA
met-c-913	Concentration of medium VLDL particles	NA	European	Males and Females	2016	11819006	19273	NA	NA	Metabolites	Lipid	Kettunen	27005778	NA	SD	NA	M.VLDL.P
ubm-a-1457	NET100 0301	NA	European	Males	2018	11734354	7916	NA	NA	Continuous	Psychiatric / neurological	Elliott LT	30305740	NA	NA	NA	NA
ukb-d-M25	Diagnoses - main ICD10: M25 Other joint disorders, not elsewhere classified	NA	European	Males and Females	2018	12784029	361194	7218	353976	Binary	NA	Neale lab	NA	NA	NA	NA	NA
finn-b-R18_ABNORMAL_WEIGHT_LOSS	Abnormal weight loss	NA	European	Males and Females	2021	16380466	NA	977	217815	Binary	NA	NA	NA	NA	NA	NA	R18_ABNORMAL_WEIGHT_LOSS
finn-b-C3_BILIARY_TRACT	Malignant neoplasm of other and unspecified parts of biliary tract	NA	European	Males and Females	2021	16380466	NA	109	218683	Binary	NA	NA	NA	NA	NA	NA	C3_BILIARY_TRACT
prot-a-2869	Signal transducer and activator of transcription 3	NA	European	Males and Females	2018	10534735	3301	NA	NA	Immune system	Protein	Sun BB	29875488	NA	NA	NA	NA
ieu-a-996	Eczema	EAGLE	European	Males and Females	2014	11059641	40835	10788	30047	Disease	Autoimmune / inflammatory	Paternoster	26482879	NA	log odds	NA	23andME excluded
ukb-b-2053	Health satisfaction	MRC-IEU	European	Males and Females	2018	9851867	152420	NA	NA	Categorical Ordered	NA	Ben Elsworth	NA	NA	SD	NA	4548: Output from GWAS pipeline using Phesant derived variables from UKBiobank
ebi-a-GCST90011696	TestASV_22 (Sutterella) prevalence	NA	European	NA	2021	5408519	8956	NA	NA	NA	NA	R<U+00FC>hlemann MC	33462482	NA	NA	NA	NA
ebi-a-GCST004420	CTACK levels	NA	European	NA	2016	9568408	3631	NA	NA	NA	NA	Ahola-Olli AV	27989323	NA	NA	NA	NA
finn-b-AB1_PARASITIC_NOS	Unspecified parasitic disease	NA	European	Males and Females	2021	16380464	NA	123	217987	Binary	NA	NA	NA	NA	NA	NA	AB1_PARASITIC_NOS
ubm-a-1771	NET100 0615	NA	European	Males	2018	11734354	7916	NA	NA	Continuous	Psychiatric / neurological	Elliott LT	30305740	NA	NA	NA	NA
prot-a-201	Sarcoplasmic/endoplasmic reticulum calcium ATPase 3	NA	European	Males and Females	2018	10534735	3301	NA	NA	Immune system	Protein	Sun BB	29875488	NA	NA	NA	NA
prot-a-742	Growth-regulated alpha protein	NA	European	Males and Females	2018	10534735	3301	NA	NA	Immune system	Protein	Sun BB	29875488	NA	NA	NA	NA
ubm-a-2072	NET100 0916	NA	European	Males	2018	11734354	7916	NA	NA	Continuous	Psychiatric / neurological	Elliott LT	30305740	NA	NA	NA	NA
ukb-b-7138	Age stopped smoking	MRC-IEU	European	Males and Females	2018	9851867	114431	NA	NA	Continuous	NA	Ben Elsworth	NA	NA	SD	NA	2897: Output from GWAS pipeline using Phesant derived variables from UKBiobank
ieu-b-4982	Sepsis (critical care)	UK Biobank	European	Males and Females	2021	12243372	431365	1380	429985	Disease	NA	Hamilton F	NA	HP:0100806	NA	NA	HES coded only (secondary care). Performed using regenie v2.2.4, adjusted for age, sex, chip, and the first 10 PCAs
ebi-a-GCST90011730	TestASV_9 (Alistipes) prevalence	NA	European	NA	2021	5408519	8956	NA	NA	NA	NA	R<U+00FC>hlemann MC	33462482	NA	NA	NA	NA
finn-b-M13_SPINENTHES	Spinal enthesopathy	NA	European	Males and Females	2021	16380219	NA	526	164682	Binary	NA	NA	NA	NA	NA	NA	M13_SPINENTHES
ieu-b-35	C-Reactive protein level	NA	European	Males and Females	2018	2414379	204402	NA	NA	Continuous	Immune system	Ligthart, S	30388399	NA	NA	NA	NA
prot-a-539	Secretogranin-1	NA	European	Males and Females	2018	10534735	3301	NA	NA	Immune system	Protein	Sun BB	29875488	NA	NA	NA	NA
ubm-a-3099	a2009s rh G temp sup-Plan polar thickness	NA	European	Males	2018	11734354	8411	NA	NA	Continuous	Psychiatric / neurological	Elliott LT	30305740	NA	NA	NA	NA
ubm-a-971	NET25 0025	NA	European	Males	2018	11734354	7916	NA	NA	Continuous	Psychiatric / neurological	Elliott LT	30305740	NA	NA	NA	NA
ukb-b-8463	Back pain for 3+ months	MRC-IEU	European	Males and Females	2018	9851867	117404	80588	36816	Binary	NA	Ben Elsworth	NA	NA	SD	NA	3571: Output from GWAS pipeline using Phesant derived variables from UKBiobank
met-a-390	X-04494	NA	European	Males and Females	2014	2544637	5007	NA	NA	Metabolites	Unknown metabolite	Shin	24816252	NA	log10 units	0.138311	NA
ukb-a-88	Non-cancer illness code self-reported: ankylosing spondylitis	Neale Lab	European	Males and Females	2017	10894596	337159	968	336191	NA	NA	Neale	NA	NA	SD	NA	NA
met-d-XL_VLDL_FC	Free cholesterol in very large VLDL	NA	European	Males and Females	2020	12321875	115078	NA	NA	Continuous	NA	Borges CM	NA	NA	NA	NA	NA
finn-b-CD2_BENIGN_BONE_SHORT_UPPER_EXALLC	Benign neoplasm: Short bones of upper limb (all cancers excluded)	NA	European	Males and Females	2021	16380337	NA	195	180598	Binary	NA	NA	NA	NA	NA	NA	CD2_BENIGN_BONE_SHORT_UPPER_EXALLC
prot-a-1230	Glucosamine-6-phosphate isomerase 1	NA	European	Males and Females	2018	10534735	3301	NA	NA	Immune system	Protein	Sun BB	29875488	NA	NA	NA	NA
finn-b-CD2_BENIGN_COLON_NOS_EXALLC	"Benign neoplasm: Colon, unspecified" (all cancers excluded)	NA	European	Males and Females	2021	16380338	NA	3337	178568	Binary	NA	NA	NA	NA	NA	NA	CD2_BENIGN_COLON_NOS_EXALLC
prot-a-1194	Growth/differentiation factor 11/8	NA	European	Males and Females	2018	10534735	3301	NA	NA	Immune system	Protein	Sun BB	29875488	NA	NA	NA	NA
ubm-a-86	IDP T1 FAST ROIs L precun cortex	NA	European	Males	2018	11734354	8427	NA	NA	Continuous	Psychiatric / neurological	Elliott LT	30305740	NA	NA	NA	NA
prot-c-4471_50_2	TGM3	NA	European	Males and Females	2019	501428	NA	NA	NA	Continuous	NA	Suhre K	28240269	EFO_0007937	NA	NA	name=Protein-glutamine gamma-glutamyltransferase E; chr=20; start=2296001; end=2341078; entrez=7053; uniprot=Q08188
ubm-a-33	IDP T1 FAST ROIs R mid front gyrus	NA	European	Males	2018	11734354	8427	NA	NA	Continuous	Psychiatric / neurological	Elliott LT	30305740	NA	NA	NA	NA
ieu-a-1188	Major Depressive Disorder	PGC	European	Males and Females	2018	13554550	173005	59851	113154	Disease	Psychiatric / neurological	Wray	29700475	NA	\\N	NA	NA
prot-a-979	Endoplasmic reticulum lectin 1	NA	European	Males and Females	2018	10534735	3301	NA	NA	Immune system	Protein	Sun BB	29875488	NA	NA	NA	NA
ebi-a-GCST90001578	Transitional B cell %lymphocyte	NA	European	NA	2020	15048937	3656	NA	NA	NA	NA	Orr<U+00F9> V	32929287	NA	NA	NA	NA
ukb-a-141	Treatment/medication code: prednisolone	Neale Lab	European	Males and Females	2017	10894596	337159	1940	335219	NA	NA	Neale	NA	NA	SD	NA	NA
ukb-b-8425	Non-cancer illness code, self-reported: nasal polyps	MRC-IEU	European	Males and Females	2018	9851867	462933	2019	460914	Binary	NA	Ben Elsworth	NA	NA	SD	NA	20002#1417: Output from GWAS pipeline using Phesant derived variables from UKBiobank
ieu-b-4915	Liver & bile duct cancer	UK Biobank	European	Males and Females	2021	7687713	372366	350	372016	Disease	Cancer	Burrows	NA	MONDO:0024477	NA	NA	NA
ukb-d-M13_SOFTTISSUEOTH	Other soft tissue disorders, not elsewhere classified	NA	European	Males and Females	2018	12694879	361194	7233	353961	Binary	NA	Neale lab	NA	NA	NA	NA	NA
finn-b-M13_POLYARTHROPATHIES	Polyarthropathies	NA	European	Males and Females	2021	16380229	NA	15246	147221	Binary	NA	NA	NA	NA	NA	NA	M13_POLYARTHROPATHIES
met-c-883	Total lipids in large LDL	NA	European	Males and Females	2016	11820652	19273	NA	NA	Metabolites	Lipid	Kettunen	27005778	NA	SD	NA	L.LDL.L
finn-b-AB1_GHLAMY_OTHER	Other diseases caused by chlamydiae (AB1_GHLAMY_OTHER)	NA	European	Males and Females	2021	16380466	NA	167	218605	Binary	NA	NA	NA	NA	NA	NA	AB1_GHLAMY_OTHER
ubm-a-1448	NET100 0292	NA	European	Males	2018	11734354	7916	NA	NA	Continuous	Psychiatric / neurological	Elliott LT	30305740	NA	NA	NA	NA
ukb-d-1538_2	Major dietary changes in the last 5 years: Yes, because of other reasons	NA	European	Males and Females	2018	13586569	360294	100875	259419	Binary	NA	Neale lab	NA	NA	NA	NA	NA
ebi-a-GCST90011344	G_Ruminococcus abundance	NA	European	NA	2021	5445767	8956	NA	NA	NA	NA	R<U+00FC>hlemann MC	33462482	NA	NA	NA	NA
prot-a-1038	Protein FAM189A2	NA	European	Males and Females	2018	10534735	3301	NA	NA	Immune system	Protein	Sun BB	29875488	NA	NA	NA	NA
finn-b-N14_OVARTORS	Torsion of ovary, ovarian pedicle and fallobian tube	NA	European	Males and Females	2021	16376184	NA	318	68969	Binary	NA	NA	NA	NA	NA	NA	N14_OVARTORS
finn-b-FG_CVD	Cardiovascular diseases (excluding rheumatic etc)	NA	European	Males and Females	2021	16380466	NA	101866	116926	Binary	NA	NA	NA	NA	NA	NA	FG_CVD
finn-b-CD2_BENIGN_MENINGES_EXALLC	Benign neoplasm of meninges (all cancers excluded)	NA	European	Males and Females	2021	16380339	NA	1280	180320	Binary	NA	NA	NA	NA	NA	NA	CD2_BENIGN_MENINGES_EXALLC
prot-c-4981_6_1	DSC3	NA	European	Males and Females	2019	501428	NA	NA	NA	Continuous	NA	Suhre K	28240269	EFO_0007937	NA	NA	name=Desmocollin-3; chr=18; start=30990008; end=31042815; entrez=1825; uniprot=Q14574
prot-a-1746	Leukocyte immunoglobulin-like receptor subfamily B member 4	NA	European	Males and Females	2018	10534735	3301	NA	NA	Immune system	Protein	Sun BB	29875488	NA	NA	NA	NA
ukb-d-S01	Diagnoses - main ICD10: S01 Open wound of head	NA	European	Males and Females	2018	10217696	361194	1694	359500	Binary	NA	Neale lab	NA	NA	NA	NA	NA
prot-a-871	E3 ubiquitin-protein ligase DTX1	NA	European	Males and Females	2018	10534735	3301	NA	NA	Immune system	Protein	Sun BB	29875488	NA	NA	NA	NA
prot-a-3036	Tumor necrosis factor receptor superfamily member 11A	NA	European	Males and Females	2018	10534735	3301	NA	NA	Immune system	Protein	Sun BB	29875488	NA	NA	NA	NA
ebi-a-GCST90000465	EN-RAGE levels	NA	European	NA	2020	7883807	982	NA	NA	NA	NA	Hillary RF	32641083	NA	NA	NA	NA
ukb-b-8553	Decaffeinated tea	MRC-IEU	European	Males and Females	2018	9851867	64949	NA	NA	Categorical Ordered	NA	Ben Elsworth	NA	NA	SD	NA	100470: Output from GWAS pipeline using Phesant derived variables from UKBiobank
finn-b-H7_MYOPIA	Myopia	NA	European	Males and Females	2021	16380455	NA	1640	210931	Binary	NA	NA	NA	NA	NA	NA	H7_MYOPIA
ukb-a-216	Illnesses of mother: Diabetes	Neale Lab	European	Males and Females	2017	10894596	308780	28875	281078	NA	NA	Neale	NA	NA	SD	NA	NA
prot-c-2771_35_2	IGFBP-1	NA	European	Males and Females	2019	501428	NA	NA	NA	Continuous	NA	Suhre K	28240269	EFO_0007937	NA	NA	name=Insulin-like growth factor-binding protein 1; chr=7; start=45888357; end=45893668; entrez=3484; uniprot=P08833
prot-b-32	resistin	NA	European	Males and Females	2018	5270646	3394	NA	NA	Immune system	Protein	Folkersen L	28369058	NA	NA	NA	NA
ukb-b-6517	Diagnoses - secondary ICD10: R31 Unspecified haematuria	MRC-IEU	European	Males and Females	2018	9851867	463010	2594	460416	Binary	NA	Ben Elsworth	NA	NA	SD	NA	41204#R31: Output from GWAS pipeline using Phesant derived variables from UKBiobank
prot-c-2580_83_2	Myeloperoxidase	NA	European	Males and Females	2019	501428	NA	NA	NA	Continuous	NA	Suhre K	28240269	EFO_0007937	NA	NA	name=Myeloperoxidase; chr=17; start=58269856; end=58280935; entrez=4353; uniprot=P05164
ubm-a-2466	NET100 1310	NA	European	Males	2018	11734354	7916	NA	NA	Continuous	Psychiatric / neurological	Elliott LT	30305740	NA	NA	NA	NA
prot-a-779	Probable ATP-dependent RNA helicase DDX58	NA	European	Males and Females	2018	10534735	3301	NA	NA	Immune system	Protein	Sun BB	29875488	NA	NA	NA	NA
ebi-a-GCST90011679	OTU99_92 (Ruminococcus) prevalence	NA	European	NA	2021	5438111	8956	NA	NA	NA	NA	R<U+00FC>hlemann MC	33462482	NA	NA	NA	NA
ubm-a-1454	NET100 0298	NA	European	Males	2018	11734354	7916	NA	NA	Continuous	Psychiatric / neurological	Elliott LT	30305740	NA	NA	NA	NA
ukb-b-7178	Doctor diagnosed hayfever or allergic rhinitis	MRC-IEU	European	Males and Females	2018	9851867	112583	25486	87097	Binary	NA	Ben Elsworth	NA	NA	SD	NA	22126: Output from GWAS pipeline using Phesant derived variables from UKBiobank
ubm-a-1648	NET100 0492	NA	European	Males	2018	11734354	7916	NA	NA	Continuous	Psychiatric / neurological	Elliott LT	30305740	NA	NA	NA	NA
prot-a-1314	Heparin-binding EGF-like growth factor	NA	European	Males and Females	2018	10534735	3301	NA	NA	Immune system	Protein	Sun BB	29875488	NA	NA	NA	NA
prot-a-1554	Inhibin beta A chain:Inhibin beta B chain heterodimer	NA	European	Males and Females	2018	10534735	3301	NA	NA	Immune system	Protein	Sun BB	29875488	NA	NA	NA	NA
met-b-232	CD8mem:%"TFH" (3)	NA	European	Females	2015	1624651	497	NA	NA	Immune system	Immune cell subset frequency	Roederer	25772697	NA	%	0.371636	Female twins
ukb-b-14425	Vegetarian alternatives intake	MRC-IEU	European	Males and Females	2018	9851867	64949	2318	62631	Binary	NA	Ben Elsworth	NA	NA	SD	NA	103250: Output from GWAS pipeline using Phesant derived variables from UKBiobank
ubm-a-362	IDP dMRI TBSS L1 Anterior corona radiata R	NA	European	Males	2018	11734354	7532	NA	NA	Continuous	Psychiatric / neurological	Elliott LT	30305740	NA	NA	NA	NA
ebi-a-GCST90002114	HLA DR on HLA DR+ CD4+ T cell	NA	European	NA	2020	14891166	3060	NA	NA	NA	NA	Orr<U+00F9> V	32929287	NA	NA	NA	NA
prot-a-2884	Syntaxin-18	NA	European	Males and Females	2018	10534735	3301	NA	NA	Immune system	Protein	Sun BB	29875488	NA	NA	NA	NA
prot-a-2258	Phosphoglucomutase-1	NA	European	Males and Females	2018	10534735	3301	NA	NA	Immune system	Protein	Sun BB	29875488	NA	NA	NA	NA
ukb-b-9591	Diagnoses - main ICD10: N92.1 Excessive and frequent menstruation with irregular cycle	MRC-IEU	European	Males and Females	2018	9851867	463010	2048	460962	Binary	NA	Ben Elsworth	NA	NA	SD	NA	41202#N921: Output from GWAS pipeline using Phesant derived variables from UKBiobank
met-a-378	Acetylphosphate	NA	European	Males and Females	2014	2545589	7789	NA	NA	Metabolites	Energy	Shin	24816252	NA	log10 units	0.0913489	NA
ukb-b-9040	Operative procedures - main OPCS: R18.2 Lower uterine segment caesarean delivery NEC	MRC-IEU	European	Males and Females	2018	9851867	463010	2254	460756	Binary	NA	Ben Elsworth	NA	NA	SD	NA	41200#R182: Output from GWAS pipeline using Phesant derived variables from UKBiobank
prot-a-2579	Roundabout homolog 3	NA	European	Males and Females	2018	10534735	3301	NA	NA	Immune system	Protein	Sun BB	29875488	NA	NA	NA	NA
finn-b-I9_RHEUVALV	Rheumatic valve diseases	NA	European	Males and Females	2021	16380466	NA	404	218219	Binary	NA	NA	NA	NA	NA	NA	I9_RHEUVALV
prot-a-1640	Killer cell immunoglobulin-like receptor 2DL2	NA	European	Males and Females	2018	10534735	3301	NA	NA	Immune system	Protein	Sun BB	29875488	NA	NA	NA	NA
ebi-a-GCST90010228	Interleukin-2 receptor subunit alpha levels	NA	European	NA	2020	18221903	1323	NA	NA	NA	NA	Gilly A	33303764	NA	NA	NA	NA
ubm-a-1743	NET100 0587	NA	European	Males	2018	11734354	7916	NA	NA	Continuous	Psychiatric / neurological	Elliott LT	30305740	NA	NA	NA	NA
prot-a-836	DnaJ homolog subfamily B member 11	NA	European	Males and Females	2018	10534735	3301	NA	NA	Immune system	Protein	Sun BB	29875488	NA	NA	NA	NA
ubm-a-2444	NET100 1288	NA	European	Males	2018	11734354	7916	NA	NA	Continuous	Psychiatric / neurological	Elliott LT	30305740	NA	NA	NA	NA
finn-b-I9_CARDMYO	Cardiomyopathy	NA	European	Males and Females	2021	16380196	NA	3100	156711	Binary	NA	NA	NA	NA	NA	NA	I9_CARDMYO
ebi-a-GCST90012046	P-selectin glycoprotein ligand 1 levels	NA	European	NA	2020	13020699	21758	NA	NA	NA	NA	Folkersen L	33067605	NA	NA	NA	NA
met-b-216	CD4nv:%preTh17	NA	European	Females	2015	1623361	497	NA	NA	Immune system	Immune cell subset frequency	Roederer	25772697	NA	%	0.534829	Female twins
ukb-d-30650_raw	Aspartate aminotransferase	NA	European	Males and Females	2018	13586009	NA	NA	NA	Metabolites	NA	Neale lab	NA	NA	NA	NA	NA
ebi-a-GCST90012050	Matrix metalloproteinase-10 levels	NA	European	NA	2020	12718221	21758	NA	NA	NA	NA	Folkersen L	33067605	NA	NA	NA	NA
ebi-a-GCST90010332	Neuronal pentraxin receptor levels	NA	European	NA	2020	18197903	1313	NA	NA	NA	NA	Gilly A	33303764	NA	NA	NA	NA
ebi-a-GCST90001894	CD28 on CD28+ CD4+ T cell	NA	European	NA	2020	14849646	2920	NA	NA	NA	NA	Orr<U+00F9> V	32929287	NA	NA	NA	NA
prot-a-598	UMP-CMP kinase	NA	European	Males and Females	2018	10534735	3301	NA	NA	Immune system	Protein	Sun BB	29875488	NA	NA	NA	NA
ebi-a-GCST90012035	Tumor necrosis factor receptor superfamily member 6 levels	NA	European	NA	2020	13138663	21758	NA	NA	NA	NA	Folkersen L	33067605	NA	NA	NA	NA
prot-a-2962	Transforming growth factor beta-1	NA	European	Males and Females	2018	10534735	3301	NA	NA	Immune system	Protein	Sun BB	29875488	NA	NA	NA	NA
prot-a-1377	Heparan sulfate glucosamine 3-O-sulfotransferase 4	NA	European	Males and Females	2018	10534735	3301	NA	NA	Immune system	Protein	Sun BB	29875488	NA	NA	NA	NA
finn-b-CD2_BENIGN_ANUS_ANAL_CANAL_EXALLC	Benign neoplasm: Anus and anal canal (all cancers excluded)	NA	European	Males and Females	2021	16380337	NA	370	180525	Binary	NA	NA	NA	NA	NA	NA	CD2_BENIGN_ANUS_ANAL_CANAL_EXALLC
prot-a-2052	Nischarin	NA	European	Males and Females	2018	10534735	3301	NA	NA	Immune system	Protein	Sun BB	29875488	NA	NA	NA	NA
finn-b-R18_CONVU_NOT_ELSEW_CLASSIFIED	Convulsions, not elsewhere classified	NA	European	Males and Females	2021	16380331	NA	4660	172999	Binary	NA	NA	NA	NA	NA	NA	R18_CONVU_NOT_ELSEW_CLASSIFIED
ubm-a-44	IDP T1 FAST ROIs L sup temp gyrus post	NA	European	Males	2018	11734354	8427	NA	NA	Continuous	Psychiatric / neurological	Elliott LT	30305740	NA	NA	NA	NA
prot-a-3159	NKG2D ligand 1	NA	European	Males and Females	2018	10534735	3301	NA	NA	Immune system	Protein	Sun BB	29875488	NA	NA	NA	NA
met-a-683	X-13429	NA	European	Males and Females	2014	2545710	6344	NA	NA	Metabolites	Unknown metabolite	Shin	24816252	NA	log10 units	0.309823	NA
ubm-a-851	IDP dMRI ProbtrackX ISOVF cgh r	NA	European	Males	2018	11734354	7532	NA	NA	Continuous	Psychiatric / neurological	Elliott LT	30305740	NA	NA	NA	NA
ebi-a-GCST004617	Eosinophil percentage of granulocytes	NA	European	NA	2016	29165900	170536	NA	NA	NA	NA	Astle WJ	27863252	NA	NA	NA	NA
prot-a-2286	Phospholipase A2, membrane associated	NA	European	Males and Females	2018	10534735	3301	NA	NA	Immune system	Protein	Sun BB	29875488	NA	NA	NA	NA
ubm-a-472	IDP dMRI TBSS L3 Cingulum hippocampus R	NA	European	Males	2018	11734354	7532	NA	NA	Continuous	Psychiatric / neurological	Elliott LT	30305740	NA	NA	NA	NA
ukb-a-17	Past tobacco smoking	Neale Lab	European	Males and Females	2017	10894596	310749	NA	NA	NA	NA	Neale	NA	NA	SD	NA	NA
ukb-b-18189	Reason for glasses/contact lenses: For long-sightedness, i.e. for distance and near, but particularly for near tasks like reading (called 'hypermetropia')	MRC-IEU	European	Males and Females	2018	9851867	460536	19050	441486	Binary	NA	Ben Elsworth	NA	NA	SD	NA	6147#2: Output from GWAS pipeline using Phesant derived variables from UKBiobank
finn-b-CD2_INSITU_MELANOMA_EXALLC	Melanoma in situ (all cancers excluded)	NA	European	Males and Females	2021	16380337	NA	393	180622	Binary	NA	NA	NA	NA	NA	NA	CD2_INSITU_MELANOMA_EXALLC
prot-a-345	Neuron-specific vesicular protein calcyon	NA	European	Males and Females	2018	10534735	3301	NA	NA	Immune system	Protein	Sun BB	29875488	NA	NA	NA	NA
ebi-a-GCST90001549	Central Memory CD8+ T cell %CD8+ T cell	NA	European	NA	2020	15141588	3427	NA	NA	NA	NA	Orr<U+00F9> V	32929287	NA	NA	NA	NA
prot-a-2641	Scavenger receptor class F member 2	NA	European	Males and Females	2018	10534735	3301	NA	NA	Immune system	Protein	Sun BB	29875488	NA	NA	NA	NA
ubm-a-2583	NET100 1427	NA	European	Males	2018	11734354	7916	NA	NA	Continuous	Psychiatric / neurological	Elliott LT	30305740	NA	NA	NA	NA
prot-c-2998_53_2	JAM-C	NA	European	Males and Females	2019	501428	NA	NA	NA	Continuous	NA	Suhre K	28240269	EFO_0007937	NA	NA	name=Junctional adhesion molecule C; chr=11; start=134068925; end=134152001; entrez=83700; uniprot=Q9BX67
ukb-a-585	Diagnoses - main ICD10: R31 Unspecified haematuria	Neale Lab	European	Males and Females	2017	10894596	337199	7363	329836	NA	NA	Neale	NA	NA	SD	NA	NA
ieu-a-30	Crohn's disease	IIBDGC	European	Males and Females	2015	12276506	20883	5956	14927	Disease	Autoimmune / inflammatory	Liu	26192919	NA	log odds	NA	NA
finn-b-ASTHMA_NOS_EXMORE	Undetermined asthma (more controls excluded)	NA	European	Males and Females	2021	16379751	NA	1778	131051	Binary	NA	NA	NA	NA	NA	NA	ASTHMA_NOS_EXMORE
prot-c-3373_5_2	Granzyme H	NA	European	Males and Females	2019	501428	NA	NA	NA	Continuous	NA	Suhre K	28240269	EFO_0007937	NA	NA	name=Granzyme H; chr=14; start=24606480; end=24609699; entrez=2999; uniprot=P20718
ebi-a-GCST90001785	CD25 on IgD- CD24- B cell	NA	European	NA	2020	15047424	3649	NA	NA	NA	NA	Orr<U+00F9> V	32929287	NA	NA	NA	NA
ukb-b-15297	Reason for glasses/contact lenses: Other eye condition	MRC-IEU	European	Males and Females	2018	9851867	460536	1615	458921	Binary	NA	Ben Elsworth	NA	NA	SD	NA	6147#7: Output from GWAS pipeline using Phesant derived variables from UKBiobank
finn-b-C3_CORPUS_UTERI_EXALLC	Malignant neoplasm of corpus uteri (all cancers excluded)	NA	European	Males and Females	2021	16378942	NA	1053	99321	Binary	NA	NA	NA	NA	NA	NA	C3_CORPUS_UTERI_EXALLC
ukb-b-7217	3mm asymmetry index (right)	MRC-IEU	European	Males and Females	2018	9851867	94258	NA	NA	Continuous	NA	Ben Elsworth	NA	NA	SD	NA	5159: Output from GWAS pipeline using Phesant derived variables from UKBiobank
finn-b-KRA_PSY_ANYMENTAL_SUICID_PREG_NERV	Any mental disorder, or suicide (or attempt), or psychic disorders complicating pregnancy, partum or puerperum or nerve system disorders	NA	European	Males and Females	2021	16380466	NA	52473	166319	Binary	NA	NA	NA	NA	NA	NA	KRA_PSY_ANYMENTAL_SUICID_PREG_NERV
ieu-a-1025	Multiple sclerosis	IMSGC	European	Males and Females	2013	156632	38589	14498	24091	Disease	Autoimmune / inflammatory	Beecham	24076602	NA	log odds	NA	NA
finn-b-K11_HEPFAIL	Hepatic failure, not elsewhere classified	NA	European	Males and Females	2021	16380437	NA	464	213592	Binary	NA	NA	NA	NA	NA	NA	K11_HEPFAIL
ebi-a-GCST90011644	OTU99_2 (Bacteroides) prevalence	NA	European	NA	2021	5438111	8956	NA	NA	NA	NA	R<U+00FC>hlemann MC	33462482	NA	NA	NA	NA
ubm-a-2120	NET100 0964	NA	European	Males	2018	11734354	7916	NA	NA	Continuous	Psychiatric / neurological	Elliott LT	30305740	NA	NA	NA	NA
met-d-XL_VLDL_C	Cholesterol in very large VLDL	NA	European	Males and Females	2020	12321875	115078	NA	NA	Continuous	NA	Borges CM	NA	NA	NA	NA	NA
prot-a-516	Centrin-2	NA	European	Males and Females	2018	10534735	3301	NA	NA	Immune system	Protein	Sun BB	29875488	NA	NA	NA	NA
met-a-586	Eicosenoate (20:1n9 or 11)	NA	European	Males and Females	2014	2545661	7799	NA	NA	Metabolites	Fatty acid	Shin	24816252	NA	log10 units	0.212089	NA
ebi-a-GCST90012114	Total testosterone levels	NA	European	NA	2020	16132861	425097	NA	NA	NA	NA	Ruth KS	32042192	NA	NA	NA	NA
ubm-a-1069	NET25 0123	NA	European	Males	2018	11734354	7916	NA	NA	Continuous	Psychiatric / neurological	Elliott LT	30305740	NA	NA	NA	NA
ebi-a-GCST90002062	CD4 on CD28+ CD4+ T cell	NA	European	NA	2020	14849646	2920	NA	NA	NA	NA	Orr<U+00F9> V	32929287	NA	NA	NA	NA
finn-b-I9_CARDMPRI_EXNONE	"Cardiomyopathies, Primary/intrinsic" (no controls excluded)	NA	European	Males and Females	2021	16380466	NA	2221	216571	Binary	NA	NA	NA	NA	NA	NA	I9_CARDMPRI_EXNONE
ubm-a-325	IDP dMRI TBSS MO External capsule L	NA	European	Males	2018	11734354	7532	NA	NA	Continuous	Psychiatric / neurological	Elliott LT	30305740	NA	NA	NA	NA
finn-b-N14_INFLUTH	Inflammatory disease of uterus	NA	European	Males and Females	2021	16379526	NA	2177	111858	Binary	NA	NA	NA	NA	NA	NA	N14_INFLUTH
ubm-a-2762	a2009s lh G front sup area	NA	European	Males	2018	11734354	8411	NA	NA	Continuous	Psychiatric / neurological	Elliott LT	30305740	NA	NA	NA	NA
ubm-a-2741	DKTatlas lh superiorparietal area	NA	European	Males	2018	11734354	8411	NA	NA	Continuous	Psychiatric / neurological	Elliott LT	30305740	NA	NA	NA	NA
ieu-b-4858	Ever smoked	Within family GWAS consortium	European	Males and Females	2022	7933821	99996	NA	NA	NA	NA	Howe LJ	NA	EFO:0005670	NA	NA	Population estimate
ukb-b-5018	Diagnoses - main ICD10: K61.0 Anal abscess	MRC-IEU	European	Males and Females	2018	9851867	463010	1034	461976	Binary	NA	Ben Elsworth	NA	NA	SD	NA	41202#K610: Output from GWAS pipeline using Phesant derived variables from UKBiobank
prot-c-4149_8_2	PDGF-BB	NA	European	Males and Females	2019	501428	NA	NA	NA	Continuous	NA	Suhre K	28240269	EFO_0007937	NA	NA	name=Platelet-derived growth factor subunit B; chr=22; start=39223359; end=39244751; entrez=5155; uniprot=P01127
prot-a-708	Di-N-acetylchitobiase	NA	European	Males and Females	2018	10534735	3301	NA	NA	Immune system	Protein	Sun BB	29875488	NA	NA	NA	NA
met-c-866	Histidine	NA	European	Males and Females	2016	11811025	19244	NA	NA	Metabolites	Amino acid	Kettunen	27005778	NA	SD	NA	NA
finn-b-E4_AMYLOIDOSIS	Amyloidosis	NA	European	Males and Females	2021	16380377	NA	226	197259	Binary	NA	NA	NA	NA	NA	NA	E4_AMYLOIDOSIS
prot-c-4994_178_1	hnRNP K	NA	European	Males and Females	2019	501428	NA	NA	NA	Continuous	NA	Suhre K	28240269	EFO_0007937	NA	NA	name=Heterogeneous nuclear ribonucleoprotein K; chr=9; start=83968083; end=83980616; entrez=3190; uniprot=P61978
ieu-a-1232	Low malignant potential mucinous ovarian cancer	OCAC	European	Females	2017	0	42090	1149	40941	Disease	Cancer	Phelan	28346442	NA	log odds	NA	NA
ukb-b-1744	Operative procedures - secondary OPCS: Y02.2 Insertion of prosthesis into organ NOC	MRC-IEU	European	Males and Females	2018	9851867	463010	2701	460309	Binary	NA	Ben Elsworth	NA	NA	SD	NA	41210#Y022: Output from GWAS pipeline using Phesant derived variables from UKBiobank
ubm-a-3087	a2009s rh G oc-temp med-Parahip thickness	NA	European	Males	2018	11734354	8411	NA	NA	Continuous	Psychiatric / neurological	Elliott LT	30305740	NA	NA	NA	NA
ukb-d-M65	Diagnoses - main ICD10: M65 Synovitis and tenosynovitis	NA	European	Males and Females	2018	11090107	361194	2812	358382	Binary	NA	Neale lab	NA	NA	NA	NA	NA
finn-b-G6_ATYFAC	Atypical facial pain	NA	European	Males and Females	2021	16380408	NA	701	195047	Binary	NA	NA	NA	NA	NA	NA	G6_ATYFAC
prot-a-445	T-cell surface glycoprotein CD3 epsilon chain	NA	European	Males and Females	2018	10534735	3301	NA	NA	Immune system	Protein	Sun BB	29875488	NA	NA	NA	NA
prot-a-1120	Filamin-A	NA	European	Males and Females	2018	10534735	3301	NA	NA	Immune system	Protein	Sun BB	29875488	NA	NA	NA	NA
ubm-a-1956	NET100 0800	NA	European	Males	2018	11734354	7916	NA	NA	Continuous	Psychiatric / neurological	Elliott LT	30305740	NA	NA	NA	NA
finn-b-AB1_SEXUAL_TRANSMISSION_NOS	Other predominantly sexually transmitted diseases, not elsewhere classified	NA	European	Males and Females	2021	16380460	NA	3114	212952	Binary	NA	NA	NA	NA	NA	NA	AB1_SEXUAL_TRANSMISSION_NOS
prot-a-396	C-C motif chemokine 20	NA	European	Males and Females	2018	10534735	3301	NA	NA	Immune system	Protein	Sun BB	29875488	NA	NA	NA	NA
ubm-a-2498	NET100 1342	NA	European	Males	2018	11734354	7916	NA	NA	Continuous	Psychiatric / neurological	Elliott LT	30305740	NA	NA	NA	NA
ebi-a-GCST90011632	OTU99_132 (Bacteroidales) prevalence	NA	European	NA	2021	5438111	8956	NA	NA	NA	NA	R<U+00FC>hlemann MC	33462482	NA	NA	NA	NA
ebi-a-GCST90000439	Axin-1 levels	NA	European	NA	2020	7883872	982	NA	NA	NA	NA	Hillary RF	32641083	NA	NA	NA	NA
ukb-b-11765	Treatment speciality of consultant (recoded): Clinical oncology	MRC-IEU	European	Males and Females	2018	9851867	444237	4945	439292	Binary	NA	Ben Elsworth	NA	NA	SD	NA	41246#1270: Output from GWAS pipeline using Phesant derived variables from UKBiobank
ukb-d-F5_DEPRESSIO	Depression	NA	European	Males and Females	2018	9518776	361194	1145	360049	Binary	NA	Neale lab	NA	NA	NA	NA	NA
prot-c-4556_10_2	IL-34	NA	European	Males and Females	2019	501428	NA	NA	NA	Continuous	NA	Suhre K	28240269	EFO_0007937	NA	NA	name=Interleukin-34; chr=16; start=70579895; end=70660682; entrez=146433; uniprot=Q6ZMJ4
met-b-155	CD27 on CD4 T	NA	European	Females	2015	1623131	497	NA	NA	Immune system	Immune cell-surface protein expression levels	Roederer	25772697	NA	arbitrary units	194.826	Female twins
prot-a-1168	Polypeptide N-acetylgalactosaminyltransferase 11	NA	European	Males and Females	2018	10534735	3301	NA	NA	Immune system	Protein	Sun BB	29875488	NA	NA	NA	NA
ubm-a-846	IDP dMRI ProbtrackX ISOVF atr l	NA	European	Males	2018	11734354	7532	NA	NA	Continuous	Psychiatric / neurological	Elliott LT	30305740	NA	NA	NA	NA
ubm-a-221	IDP dMRI TBSS FA Superior corona radiata L	NA	European	Males	2018	11734354	7532	NA	NA	Continuous	Psychiatric / neurological	Elliott LT	30305740	NA	NA	NA	NA
met-b-161	CD3 on 127+DN T	NA	European	Females	2015	1617019	497	NA	NA	Immune system	Immune cell-surface protein expression levels	Roederer	25772697	NA	arbitrary units	2559.85	Female twins
ukb-a-329	Ever stopped smoking for 6+ months	Neale Lab	European	Males and Females	2017	10894596	81538	35064	46474	NA	NA	Neale	NA	NA	SD	NA	NA
ubm-a-1393	NET100 0237	NA	European	Males	2018	11734354	7916	NA	NA	Continuous	Psychiatric / neurological	Elliott LT	30305740	NA	NA	NA	NA
finn-b-K11_PERIODON_CHRON	Chronic periodontitis	NA	European	Males and Females	2021	16380378	NA	3046	195395	Binary	NA	NA	NA	NA	NA	NA	K11_PERIODON_CHRON
[truncated: 16,099 more rows]
